# Supplementary material for: Interaction between Teneurin-2 and microtubules via EB proteins provides a platform for GABAA receptor exocytosis
Source: eLife journal article supplement (doi:10.7554/elife.83276), 2023-06-05
Supplement: fig1-data1 [file 1F-H.xlsx]

## Sheet: Sheet1
Trial No	Observation length	Number of anterograde comets	Number of retrograde comets	Total gephyrin positive pixel	Total gephyrin positive length	gephyrin positive / total length ratio	Total gephyrin negative length	Number of anterograde comets stop at gep	Number of retrograde comets stop at gep	probability of anterograde comets stop at gep	probability of anterograde comets stop at non-gep	probability of retrograde comets stop at gep	probability of retrograde comets stop at non-gep	Number of total comets	Number of total comets stop at gep	plobability of total comets stop at gep	plobability of anterograde comets stop at non-gep
1	31.3656	40	14	31	4.0858	0.130264	27.2798	12	3	0.74103	0.25897	0.645507	0.354493	54	15	0.719729	0.280271
2	39.1446	22	3	29	3.8222	0.0976431	35.3224	2	0	0.480287	0.519713			25	2	0.445553	0.554447
3	73.2743	77	22	51	6.7218	0.0917348	66.5525	21	5	0.787815	0.212185	0.74438	0.25562	99	26	0.779073	0.220927
4	66.5531	36	6	106	13.9708	0.20992	52.5823	16	5	0.750685	0.249315	0.949542	0.0504575	42	21	0.79008	0.20992
5	58.6458	30	11	42	5.5356	0.0943904	53.1102	3	1	0.515981	0.484019	0.489647	0.510353	41	4	0.509135	0.490865
6	45.5987	31	3	31	4.0858	0.0896034	41.5129	9	0	0.806069	0.193931			34	9	0.785302	0.214698
7	57.3279	27	13	84	11.0712	0.193121	46.2567	9	3	0.676276	0.323724	0.556233	0.443767	40	12	0.641657	0.358343
