# Supplementary material for: Interaction between Teneurin-2 and microtubules via EB proteins provides a platform for GABAA receptor exocytosis
Source: eLife journal article supplement (doi:10.7554/elife.83276), 2023-06-05
Supplement: fig1-data1 [file 1F.xlsx]

## Sheet: Figure 1F
Total Comet Pauring Probability
gephyrin	ratio		Welch Two Sample t-test
positive	0.719729
positive	0.445553		data: dat$ratio by dat$gephyrin
positive	0.779073		t = -4.4475, df = 12, p-value = 0.0007963
positive	0.79008		alternative hypothesis: true difference in means between group Negative and group Positive is not equal to 0
positive	0.509135		95 percent confidence interval:
positive	0.759221		-0.4871727 -0.1667978
positive	0.641657		sample estimates:
negative	0.280271		mean in group Negative mean in group Positive
negative	0.554447		0.3365074 0.6634926
negative	0.220927
negative	0.20992
negative	0.490865
negative	0.240779
negative	0.358343
