# Supplementary material for: Interaction between Teneurin-2 and microtubules via EB proteins provides a platform for GABAA receptor exocytosis
Source: eLife journal article supplement (doi:10.7554/elife.83276), 2023-06-05
Supplement: fig1-data1 [file 1G.xlsx]

## Sheet: Figure 1G
Anterogrande Comet Pauring Probability
gephyrin	ratio		Welch Two Sample t-test
Positive	0.74103
Positive	0.480287		data: dat$ratio by dat$gephyrin
Positive	0.787815		t = -5.1318, df = 12, p-value = 0.0002484
Positive	0.750685		alternative hypothesis: true difference in means between group Negative and group Positive is not equal to 0
Positive	0.515981		95 percent confidence interval:
Positive	0.806069		-0.5120899 -0.2068491
Positive	0.676276		sample estimates:
Negative	0.25897		mean in group Negative mean in group Positive
Negative	0.519713		0.3202652 0.6797348
Negative	0.212185
Negative	0.249315
Negative	0.484019
Negative	0.193931
Negative	0.323724
