# Supplementary material for: Interaction between Teneurin-2 and microtubules via EB proteins provides a platform for GABAA receptor exocytosis
Source: eLife journal article supplement (doi:10.7554/elife.83276), 2023-06-05
Supplement: fig1-data1 [file 1H.xlsx]

## Sheet: Figure 1H
Anterogrande Comet Pausing Probability
gephyrin	ratio		Welch Two Sample t-test
Positive	0.645507
Positive	0.74438		data: dat$ratio by dat$gephyrin
Positive	0.949542		t = -3.1119, df = 8, p-value = 0.0144
Positive	0.489647		alternative hypothesis: true difference in means between group Negative and group Positive is not equal to 0
Positive	0.556233		95 percent confidence interval:
Negative	0.354493		-0.61653947 -0.09170796
Negative	0.25562		sample estimates:
Negative	0.0504575		mean in group Negative mean in group Positive
Negative	0.510353		0.3229381 0.6770619
Negative	0.443767
