# Supplementary material for: Interaction between Teneurin-2 and microtubules via EB proteins provides a platform for GABAA receptor exocytosis
Source: eLife journal article supplement (doi:10.7554/elife.83276), 2023-06-05
Supplement: fig2-data1 [file 2C.xlsx]

## Sheet: Sheet1
Cluster analysis of inhibitory postsynapses.
Index	marker	area (µm2)	MAP2 (AU)	actin (AU)	UMAP1	UMAP2	cluster	NLGN2 (AU) 1<: positive 1>: negative	IGSF9b (AU) 1<: positive 1>: negative	TEN2 (AU) 1<: positive 1>: negative
1	NLGN2	0.035	6.2288	2.1628	-6.51001	1.511	1	1.15743	N/A	N/A
2	NLGN2	0.378	5.07691	1.11132	-6.52062	1.48616	1	1.07398	N/A	N/A
3	NLGN2	0.112	4.81009	1.66934	-6.43791	1.38953	1	2.27602	N/A	N/A
4	NLGN2	0.052	4.57487	2.5136	-6.11417	1.39722	1	0.839915	N/A	N/A
5	NLGN2	0.208	4.20808	2.71378	-5.62154	1.27461	1	1.28532	N/A	N/A
6	NLGN2	0.114	3.97005	1.7399	-5.87559	0.592276	1	2.15725	N/A	N/A
7	NLGN2	0.058	3.8648	1.26559	-6.36556	-1.21949	1	0.851672	N/A	N/A
8	NLGN2	0.037	3.77793	2.35037	-5.39394	0.88126	1	1.68209	N/A	N/A
9	NLGN2	0.037	3.77793	2.35037	-5.4425	0.895376	1	1.68209	N/A	N/A
10	NLGN2	0.071	3.67677	1.72037	-5.77634	0.380329	1	1.41354	N/A	N/A
11	NLGN2	0.272	3.56655	0.848215	-6.40228	-1.57725	1	1.93005	N/A	N/A
12	NLGN2	0.259	3.48228	4.09096	-4.04148	2.28041	1	1.3086	N/A	N/A
13	NLGN2	0.064	3.47267	1.21606	-6.29938	-1.34111	1	2.38438	N/A	N/A
14	NLGN2	0.052	3.35165	2.89963	-4.45335	1.205	1	1.32217	N/A	N/A
15	NLGN2	0.276	3.30401	1.19504	-6.27673	-1.50823	1	2.89911	N/A	N/A
16	NLGN2	0.114	3.25331	1.61394	-5.78497	-1.07611	1	1.29403	N/A	N/A
17	NLGN2	0.075	3.25002	1.64876	-5.70178	-0.983645	1	1.38636	N/A	N/A
18	NLGN2	0.232	3.24375	1.74604	-5.67031	-0.887445	1	2.49099	N/A	N/A
19	NLGN2	0.056	3.24269	3.31177	-4.10856	1.69815	1	2.26195	N/A	N/A
20	NLGN2	0.071	3.15885	1.90933	-5.10588	-0.277695	1	0.863769	N/A	N/A
21	NLGN2	0.255	3.13004	1.51986	-5.6842	-1.24749	1	1.93872	N/A	N/A
22	NLGN2	0.048	3.12821	1.35436	-5.90459	-1.42751	1	0.549932	N/A	N/A
23	NLGN2	0.151	3.05829	1.70689	-5.50433	-1.05695	1	1.86179	N/A	N/A
24	NLGN2	0.168	3.02533	1.68831	-5.48244	-1.06218	1	1.50297	N/A	N/A
25	NLGN2	0.154	3.01737	1.40081	-5.74563	-1.46737	1	2.05886	N/A	N/A
26	NLGN2	0.137	2.99982	1.4499	-5.61701	-1.45546	1	1.41186	N/A	N/A
27	NLGN2	0.054	2.98953	0.617682	-5.96611	-2.64053	1	1.36134	N/A	N/A
28	NLGN2	0.118	2.94156	1.44929	-5.58918	-1.48192	1	1.55021	N/A	N/A
29	NLGN2	0.079	2.8788	3.80051	-3.76922	2.22079	1	0.911418	N/A	N/A
30	NLGN2	0.166	2.82883	4.73282	-3.73892	3.10964	1	1.01555	N/A	N/A
31	NLGN2	0.214	2.81648	2.15512	-4.5404	-0.230919	1	1.83036	N/A	N/A
32	NLGN2	0.309	2.72322	1.65567	-4.97186	-1.38372	1	2.86212	N/A	N/A
33	NLGN2	0.403	2.71415	1.88887	-4.40269	-1.06627	1	2.03218	N/A	N/A
34	NLGN2	0.048	2.71237	1.93752	-4.6805	-0.943346	1	1.14879	N/A	N/A
35	NLGN2	0.264	2.6803	4.30818	-3.68363	3.04431	1	2.59273	N/A	N/A
36	NLGN2	0.098	2.65436	4.7857	-3.73094	3.17918	1	1.12882	N/A	N/A
37	NLGN2	0.235	2.57723	1.9656	-4.14263	-0.942502	1	1.45649	N/A	N/A
38	NLGN2	0.056	2.57235	2.89808	-3.411	1.12811	1	1.65918	N/A	N/A
39	NLGN2	0.309	2.56464	2.34998	-3.57939	-0.201092	1	2.22478	N/A	N/A
40	NLGN2	0.181	2.48098	2.78775	-3.35864	1.02126	1	1.97777	N/A	N/A
41	NLGN2	0.565	2.4804	1.45167	-3.88235	-2.58952	1	2.74092	N/A	N/A
42	NLGN2	0.741	2.45672	1.86591	-3.80052	-1.20028	1	2.67986	N/A	N/A
43	NLGN2	0.243	2.45427	1.54778	-3.8184	-2.60371	1	1.70154	N/A	N/A
44	NLGN2	0.141	2.43804	2.07743	-3.61974	-0.936106	1	2.61098	N/A	N/A
45	NLGN2	0.577	2.41751	2.28529	-3.40585	-0.628228	1	1.80405	N/A	N/A
46	NLGN2	0.272	2.39569	1.40505	-3.85337	-2.733	1	1.76981	N/A	N/A
47	NLGN2	0.243	2.34372	1.64598	-3.69978	-2.49337	1	1.2433	N/A	N/A
48	NLGN2	0.185	2.32561	3.49585	-3.16615	2.03536	1	1.0462	N/A	N/A
49	NLGN2	0.531	2.31374	2.2443	-3.40023	-0.747323	1	1.89682	N/A	N/A
50	NLGN2	0.064	2.30216	0.602737	-5.69636	-3.20101	1	4.52491	N/A	N/A
51	NLGN2	0.131	2.2945	0.950642	-5.53876	-3.29075	1	1.96284	N/A	N/A
52	NLGN2	0.78	2.28806	1.27872	-3.60677	-2.88755	1	3.372	N/A	N/A
53	NLGN2	0.166	2.28554	1.64973	-3.57807	-2.50523	1	2.02702	N/A	N/A
54	NLGN2	0.282	2.28446	2.1217	-3.43602	-0.835692	1	2.62819	N/A	N/A
55	NLGN2	0.183	2.28278	1.43492	-3.82947	-2.7353	1	2.34979	N/A	N/A
56	NLGN2	0.124	2.2129	4.3694	-3.53583	3.2641	1	1.13575	N/A	N/A
57	NLGN2	0.023	2.17626	2.21737	-3.04567	-0.505214	1	0.880506	N/A	N/A
58	NLGN2	0.602	2.17266	1.29715	-3.51462	-3.05786	1	2.28492	N/A	N/A
59	NLGN2	0.042	2.16931	1.29808	-3.56664	-3.25958	1	1.30152	N/A	N/A
60	NLGN2	0.33	2.16678	2.52912	-3.00479	0.171966	1	2.12238	N/A	N/A
61	NLGN2	0.075	2.15653	2.84252	-2.98513	1.115	1	0.742688	N/A	N/A
62	NLGN2	0.137	2.1441	0.921391	-5.55368	-3.33752	1	1.49921	N/A	N/A
63	NLGN2	0.093	2.14051	0.823751	-5.58341	-3.37959	1	1.52436	N/A	N/A
64	NLGN2	0.178	2.13141	4.42217	-3.54098	3.31544	1	1.80715	N/A	N/A
65	NLGN2	0.178	2.12639	1.30809	-3.51441	-3.29635	1	3.23171	N/A	N/A
66	NLGN2	0.181	2.09859	1.61734	-3.18001	-2.4696	1	1.55317	N/A	N/A
67	NLGN2	0.239	2.09766	2.68702	-2.94194	0.411532	1	2.96659	N/A	N/A
68	NLGN2	0.108	2.09531	2.43963	-2.90963	-0.00803476	1	1.59538	N/A	N/A
69	NLGN2	0.253	2.09469	1.60158	-3.15854	-2.44021	1	2.25146	N/A	N/A
70	NLGN2	0.347	2.05506	1.78774	-2.92849	-2.14406	1	2.3793	N/A	N/A
71	NLGN2	0.21	2.0411	0.805904	-5.53927	-3.37014	1	1.70829	N/A	N/A
72	NLGN2	0.23	2.03567	2.27058	-2.81671	-0.365745	1	1.4683	N/A	N/A
73	NLGN2	0.06	2.03202	1.26832	-3.41987	-3.36457	1	1.67604	N/A	N/A
74	NLGN2	0.309	2.02654	2.54192	-2.90365	0.319191	1	1.63855	N/A	N/A
75	NLGN2	0.197	2.02254	1.2684	-3.33336	-3.40276	1	2.31021	N/A	N/A
76	NLGN2	0.108	2.02187	1.43243	-3.06576	-3.24834	1	2.4996	N/A	N/A
77	NLGN2	0.174	2.01298	2.32602	-2.79924	-0.181364	1	1.42678	N/A	N/A
78	NLGN2	0.124	2.00711	2.01904	-2.68216	-1.19729	1	1.52386	N/A	N/A
79	NLGN2	0.573	1.9945	2.01562	-2.39947	-1.663	1	1.89831	N/A	N/A
80	NLGN2	0.206	1.99447	1.70524	-2.86123	-2.30927	1	2.39254	N/A	N/A
81	NLGN2	0.344	1.98438	1.62614	-2.91146	-2.43163	1	1.90804	N/A	N/A
82	NLGN2	0.085	1.97719	3.27671	-2.3881	1.90085	1	1.23185	N/A	N/A
83	NLGN2	0.743	1.9543	2.28916	-2.38005	-1.5356	1	2.88095	N/A	N/A
84	NLGN2	0.129	1.94291	1.1435	-3.12871	-3.64006	1	1.6893	N/A	N/A
85	NLGN2	0.262	1.92081	1.67744	-2.76802	-2.38363	1	1.85331	N/A	N/A
86	NLGN2	0.299	1.91262	1.37906	-2.61495	-3.50986	1	1.58002	N/A	N/A
87	NLGN2	0.218	1.90948	2.50417	-2.73235	0.170097	1	1.79965	N/A	N/A
88	NLGN2	0.426	1.87774	1.58978	-2.6775	-2.47302	1	2.0712	N/A	N/A
89	NLGN2	0.137	1.87646	1.49087	-2.70187	-3.16842	1	2.42545	N/A	N/A
90	NLGN2	0.156	1.87215	3.30692	-2.3438	1.99321	1	1.01911	N/A	N/A
91	NLGN2	0.309	1.86089	3.70688	-2.55487	2.53937	1	1.55979	N/A	N/A
92	NLGN2	0.16	1.85862	1.98714	-2.44051	-1.66918	1	1.75298	N/A	N/A
93	NLGN2	0.212	1.84216	1.3314	-2.47109	-3.63983	1	1.37486	N/A	N/A
94	NLGN2	0.264	1.83521	1.39711	-2.43923	-3.64955	1	2.10274	N/A	N/A
95	NLGN2	0.023	1.82652	1.57818	-2.61236	-2.88622	1	1.86974	N/A	N/A
96	NLGN2	0.166	1.8149	1.29251	-2.32547	-3.81584	1	1.30099	N/A	N/A
97	NLGN2	0.166	1.80696	1.09182	-2.03258	-4.52552	2	1.72531	N/A	N/A
98	NLGN2	0.127	1.80596	4.29051	-3.34393	3.48859	1	1.25217	N/A	N/A
99	NLGN2	0.081	1.78174	3.00435	-2.17647	1.70305	1	1.16159	N/A	N/A
100	NLGN2	0.208	1.78086	2.73761	-2.15202	1.20021	1	1.48989	N/A	N/A
101	NLGN2	0.419	1.74214	1.90325	-2.09611	-1.91396	1	2.37686	N/A	N/A
102	NLGN2	0.183	1.7211	3.03448	-2.15602	1.70383	1	2.19048	N/A	N/A
103	NLGN2	0.042	1.70356	1.886	-2.37203	-1.99714	1	2.04372	N/A	N/A
104	NLGN2	0.002	1.67084	4.24609	-3.36095	3.55811	1	1.39408	N/A	N/A
105	NLGN2	0.369	1.64645	2.78161	-1.98366	1.4816	1	1.75281	N/A	N/A
106	NLGN2	0.16	1.64246	1.02635	-1.74642	-4.78915	2	0.92702	N/A	N/A
107	NLGN2	0.048	1.62479	7.26771	0.240551	9.19788	3	1.54483	N/A	N/A
108	NLGN2	0.179	1.6128	0.976883	-1.69641	-4.88896	2	1.83121	N/A	N/A
109	NLGN2	0.247	1.61254	1.4388	-1.29158	-3.85563	2	2.13947	N/A	N/A
110	NLGN2	0.448	1.6103	1.97636	-1.5215	-1.96151	2	1.7863	N/A	N/A
111	NLGN2	0.33	1.60553	2.28256	0.394646	-0.500038	2	2.55445	N/A	N/A
112	NLGN2	0.461	1.59617	1.52809	-0.915973	-2.69834	2	2.64005	N/A	N/A
113	NLGN2	0.282	1.59579	1.16414	-1.51812	-4.54658	2	2.03724	N/A	N/A
114	NLGN2	0.531	1.56111	2.96672	-1.95043	1.5514	1	1.69186	N/A	N/A
115	NLGN2	0.197	1.53094	2.25378	0.396989	-0.513117	2	0.982439	N/A	N/A
116	NLGN2	0.322	1.53048	3.8113	-2.5413	2.78297	1	2.87678	N/A	N/A
117	NLGN2	0.28	1.51479	1.17669	-1.16935	-4.56898	2	1.86036	N/A	N/A
118	NLGN2	0.21	1.50176	2.71902	-1.77188	1.3473	1	2.10954	N/A	N/A
119	NLGN2	0.046	1.50032	2.7537	-1.69921	1.29833	1	0.997051	N/A	N/A
120	NLGN2	0.095	1.49353	1.592	-0.589745	-3.28681	2	0.990794	N/A	N/A
121	NLGN2	0.181	1.49263	0.995316	-1.20072	-4.86395	2	2.23815	N/A	N/A
122	NLGN2	0.313	1.49237	2.27336	0.477957	-0.417045	2	1.90878	N/A	N/A
123	NLGN2	0.411	1.47301	1.62334	-0.576775	-2.55355	2	1.97784	N/A	N/A
124	NLGN2	0.22	1.42475	0.976079	-1.04603	-4.89068	2	1.94595	N/A	N/A
125	NLGN2	0.232	1.42175	1.77559	-0.285362	-2.32221	2	1.97125	N/A	N/A
126	NLGN2	0.06	1.40318	5.64728	0.32486	8.92556	3	1.62743	N/A	N/A
127	NLGN2	0.195	1.37029	2.99034	1.18046	3.28554	3	2.3734	N/A	N/A
128	NLGN2	0.183	1.36711	1.20242	-0.843867	-4.50323	2	2.27041	N/A	N/A
129	NLGN2	0.282	1.33232	1.72305	-0.204683	-2.37982	2	1.49713	N/A	N/A
130	NLGN2	0.06	1.33122	1.34811	-0.322704	-3.97654	2	1.49365	N/A	N/A
131	NLGN2	0.122	1.31498	2.26108	0.7959	-0.252607	2	0.633642	N/A	N/A
132	NLGN2	0.755	1.31482	1.62286	-0.156201	-2.73743	2	3.33213	N/A	N/A
133	NLGN2	0.062	1.31088	2.47623	0.862365	0.121935	2	1.29826	N/A	N/A
134	NLGN2	0.253	1.29709	0.777891	-0.672965	-5.24279	2	1.64538	N/A	N/A
135	NLGN2	0.199	1.29435	2.54705	0.844213	0.248841	2	2.27305	N/A	N/A
136	NLGN2	0.079	1.29399	1.62313	-0.129035	-3.27799	2	0.995268	N/A	N/A
137	NLGN2	0.183	1.29357	2.30043	0.872805	-0.182618	2	1.2202	N/A	N/A
138	NLGN2	0.052	1.29155	2.84237	1.24715	3.09592	3	0.612698	N/A	N/A
139	NLGN2	0.54	1.27325	2.49957	0.809816	0.258837	2	1.70709	N/A	N/A
140	NLGN2	0.272	1.25878	1.82355	0.0991143	-2.21556	2	1.61385	N/A	N/A
141	NLGN2	0.388	1.25539	2.69033	0.759841	0.642178	2	2.17437	N/A	N/A
142	NLGN2	0.423	1.24668	4.4327	0.873097	7.65164	3	2.0195	N/A	N/A
143	NLGN2	0.069	1.24586	1.03045	-0.835114	-4.89312	2	1.11743	N/A	N/A
144	NLGN2	0.313	1.24417	2.44332	0.803166	0.201003	2	1.42826	N/A	N/A
145	NLGN2	0.234	1.23911	2.92373	1.31136	3.19558	3	1.24009	N/A	N/A
146	NLGN2	0.303	1.23731	1.44628	0.14679	-3.60696	2	2.18973	N/A	N/A
147	NLGN2	0.326	1.22324	2.21706	1.32911	-0.373055	2	2.47031	N/A	N/A
148	NLGN2	0.199	1.21661	1.89946	0.460648	-1.99533	2	1.29847	N/A	N/A
149	NLGN2	0.093	1.21497	2.37346	1.02282	0.0243076	2	1.19136	N/A	N/A
150	NLGN2	0.143	1.20471	3.7195	1.1197	4.93503	3	0.952812	N/A	N/A
151	NLGN2	0.185	1.20459	1.86569	0.385259	-2.05154	2	2.57715	N/A	N/A
152	NLGN2	0.303	1.2031	2.76964	0.822138	0.78575	2	1.26281	N/A	N/A
153	NLGN2	0.166	1.16718	3.97585	1.3787	5.86492	3	1.28814	N/A	N/A
154	NLGN2	0.363	1.16495	2.50603	0.941045	0.329411	2	1.21686	N/A	N/A
155	NLGN2	0.095	1.15026	2.47735	1.06254	0.253432	2	0.802359	N/A	N/A
156	NLGN2	0.141	1.14521	4.38709	0.962103	7.67378	3	1.19158	N/A	N/A
157	NLGN2	0.131	1.13911	3.69046	1.09056	4.92374	3	0.860002	N/A	N/A
158	NLGN2	0.122	1.12438	1.30482	0.17965	-3.91863	2	1.68785	N/A	N/A
159	NLGN2	0.164	1.12438	5.27011	0.413742	8.68237	3	0.77454	N/A	N/A
160	NLGN2	0.166	1.11884	2.22317	1.51014	-0.360954	2	2.82976	N/A	N/A
161	NLGN2	0.237	1.10385	4.74823	0.540642	8.15437	3	0.990473	N/A	N/A
162	NLGN2	0.17	1.09242	2.18073	1.54353	-0.410336	2	1.0855	N/A	N/A
163	NLGN2	0.139	1.0732	1.95201	0.809042	-2.01464	2	1.24604	N/A	N/A
164	NLGN2	0.125	1.07073	1.67467	0.938545	-3.63989	2	1.90451	N/A	N/A
165	NLGN2	0.091	1.0615	1.55207	0.904857	-3.73949	2	1.13416	N/A	N/A
166	NLGN2	0.6	1.05636	1.65487	0.454612	-2.91875	2	2.78012	N/A	N/A
167	NLGN2	0.392	1.04962	1.73621	0.590775	-2.64341	2	1.52912	N/A	N/A
168	NLGN2	0.079	1.04614	1.59701	0.989738	-3.70828	2	1.67252	N/A	N/A
169	NLGN2	0.172	1.03653	1.90936	0.884447	-2.10282	2	1.55628	N/A	N/A
170	NLGN2	0.268	1.02576	1.87033	0.84949	-2.26145	2	2.3113	N/A	N/A
171	NLGN2	0.183	0.992066	2.22901	1.83605	-0.201186	2	2.3884	N/A	N/A
172	NLGN2	0.05	0.984862	4.68381	0.593068	8.11413	3	1.36788	N/A	N/A
173	NLGN2	0.199	0.978974	0.931093	2.53297	-6.3739	2	1.65794	N/A	N/A
174	NLGN2	0.156	0.974272	4.80814	0.515564	8.17053	3	0.982375	N/A	N/A
175	NLGN2	0.457	0.96225	2.26432	1.71327	-0.296101	2	1.31564	N/A	N/A
176	NLGN2	0.235	0.960285	4.75182	0.514712	8.12758	3	2.09051	N/A	N/A
177	NLGN2	0.104	0.951988	4.47664	0.991068	7.75742	3	0.756607	N/A	N/A
178	NLGN2	0.361	0.949724	1.00947	2.57438	-6.25077	2	2.37129	N/A	N/A
179	NLGN2	0.266	0.936066	2.81122	2.08515	2.65937	3	2.16859	N/A	N/A
180	NLGN2	0.1	0.912176	1.50436	1.04526	-3.80216	2	1.30599	N/A	N/A
181	NLGN2	0.085	0.906862	3.04689	2.09806	3.07155	3	1.10078	N/A	N/A
182	NLGN2	0.12	0.906757	3.284	1.97661	3.74551	3	0.606945	N/A	N/A
183	NLGN2	0.066	0.905665	1.29315	2.72427	-5.46986	2	1.70037	N/A	N/A
184	NLGN2	0.301	0.898892	1.97162	2.70928	-2.07073	2	1.55024	N/A	N/A
185	NLGN2	0.21	0.868157	1.19358	2.74059	-5.59362	2	1.2709	N/A	N/A
186	NLGN2	0.079	0.865921	0.640207	2.43155	-6.66548	2	1.43618	N/A	N/A
187	NLGN2	0.156	0.856927	1.6613	1.19961	-3.63183	2	1.87508	N/A	N/A
188	NLGN2	0.206	0.855583	0.821891	2.46469	-6.55646	2	1.14003	N/A	N/A
189	NLGN2	0.05	0.855019	1.30137	2.73832	-5.4686	2	2.31086	N/A	N/A
190	NLGN2	0.095	0.839088	3.56058	1.5567	5.38827	3	0.800571	N/A	N/A
191	NLGN2	0.318	0.811348	3.73684	1.81155	5.72072	3	1.13855	N/A	N/A
192	NLGN2	0.112	0.810971	4.35644	1.36359	7.67397	3	1.1676	N/A	N/A
193	NLGN2	0.272	0.807405	3.55699	1.77465	5.48478	3	1.53558	N/A	N/A
194	NLGN2	0.212	0.796437	3.03495	2.32101	2.89197	3	1.81488	N/A	N/A
195	NLGN2	0.21	0.794262	3.76346	1.7361	5.66408	3	1.69328	N/A	N/A
196	NLGN2	0.193	0.794005	0.689441	2.43708	-6.63326	2	1.71631	N/A	N/A
197	NLGN2	0.307	0.771977	3.75719	1.88624	5.69689	3	1.85392	N/A	N/A
198	NLGN2	0.164	0.742496	2.14962	2.89805	-1.37894	2	0.876913	N/A	N/A
199	NLGN2	0.224	0.729339	1.96784	2.87831	-2.13368	2	2.43896	N/A	N/A
200	NLGN2	0.315	0.718945	2.5552	2.91538	0.688123	2	1.83947	N/A	N/A
201	NLGN2	0.193	0.711711	3.014	2.48186	2.91966	3	1.7931	N/A	N/A
202	NLGN2	0.019	0.692231	3.74797	2.53553	5.36209	3	0.735646	N/A	N/A
203	NLGN2	0.044	0.689923	2.46713	2.99562	0.26612	2	0.518776	N/A	N/A
204	NLGN2	0.158	0.672165	1.78239	3.24519	-3.05198	2	1.47406	N/A	N/A
205	NLGN2	0.083	0.666629	2.37878	3.24647	-0.0766628	2	0.639224	N/A	N/A
206	NLGN2	0.261	0.662562	3.34097	2.43336	3.96364	3	1.31168	N/A	N/A
207	NLGN2	0.438	0.653929	3.75582	1.97573	5.76554	3	1.70231	N/A	N/A
208	NLGN2	0.064	0.626851	2.05335	3.46392	-1.98503	2	1.74906	N/A	N/A
209	NLGN2	0.452	0.626763	1.88117	3.35229	-2.85319	2	2.96323	N/A	N/A
210	NLGN2	0.149	0.604976	2.92393	2.66497	2.86146	3	1.12964	N/A	N/A
211	NLGN2	0.232	0.599136	3.18451	2.8721	3.65096	3	1.9902	N/A	N/A
212	NLGN2	0.093	0.588949	1.07191	2.94263	-6.11833	2	0.310931	N/A	N/A
213	NLGN2	0.257	0.585113	1.42175	3.41106	-4.87528	2	2.60294	N/A	N/A
214	NLGN2	0.154	0.584058	3.04525	2.82468	3.19886	3	1.00348	N/A	N/A
215	NLGN2	0.122	0.577647	2.01582	3.69551	-2.03327	2	3.15931	N/A	N/A
216	NLGN2	0.195	0.561319	3.31398	2.91211	3.8978	3	1.20507	N/A	N/A
217	NLGN2	0.156	0.548883	2.32384	3.94944	-0.268644	2	1.5217	N/A	N/A
218	NLGN2	0.079	0.548759	4.43362	1.77722	7.97444	3	0.606398	N/A	N/A
219	NLGN2	0.046	0.536184	1.59891	3.7631	-4.47438	2	0.854962	N/A	N/A
220	NLGN2	0.152	0.52446	2.00007	3.78471	-2.05489	2	1.72574	N/A	N/A
221	NLGN2	0.031	0.521673	4.56494	1.66857	8.35978	3	1.39323	N/A	N/A
222	NLGN2	0.077	0.512712	3.57189	2.85212	5.03304	3	0.759229	N/A	N/A
223	NLGN2	0.166	0.490835	3.17914	3.05378	3.63778	3	1.83703	N/A	N/A
224	NLGN2	0.201	0.489396	2.1369	4.01001	-1.21229	2	1.97072	N/A	N/A
225	NLGN2	0.062	0.478404	5.96803	0.191639	9.26389	3	0.952159	N/A	N/A
226	NLGN2	0.137	0.465496	1.70164	3.95414	-3.31036	2	1.86718	N/A	N/A
227	NLGN2	0.272	0.460624	4.08126	2.50724	7.10405	3	1.20098	N/A	N/A
228	NLGN2	0.129	0.458069	2.80959	3.68036	1.83897	2	0.564464	N/A	N/A
229	NLGN2	0.253	0.453903	3.75413	2.66302	5.37568	3	1.6267	N/A	N/A
230	NLGN2	0.06	0.45113	5.77895	0.213834	9.27688	3	0.475117	N/A	N/A
231	NLGN2	0.048	0.440405	1.09196	3.71114	-6.01785	2	1.52323	N/A	N/A
232	NLGN2	0.044	0.440082	1.78119	4.14008	-2.86489	2	1.31124	N/A	N/A
233	NLGN2	0.081	0.43623	3.18781	3.19746	3.76344	3	0.510289	N/A	N/A
234	NLGN2	0.199	0.417549	3.42611	3.26905	4.31934	3	1.05169	N/A	N/A
235	NLGN2	0.305	0.412278	2.99136	3.67437	2.10191	2	1.12676	N/A	N/A
236	NLGN2	0.002	0.390713	1.63601	4.16278	-3.97744	2	0.413692	N/A	N/A
237	NLGN2	0.286	0.388931	2.65249	3.7412	1.51952	2	1.79112	N/A	N/A
238	NLGN2	0.133	0.380231	6.54061	0.161939	9.28747	3	1.93567	N/A	N/A
239	NLGN2	0.041	0.379904	2.3473	4.25121	-0.134013	2	1.05644	N/A	N/A
240	NLGN2	0.178	0.371832	4.57608	1.64273	8.48162	3	1.10463	N/A	N/A
241	NLGN2	0.085	0.35235	1.83123	4.239	-2.38926	2	2.0327	N/A	N/A
242	NLGN2	0.046	0.349177	3.25804	3.43734	3.89115	3	0.739981	N/A	N/A
243	NLGN2	0.041	0.341634	1.4845	4.20383	-4.95095	2	1.2753	N/A	N/A
244	NLGN2	0.195	0.325986	2.10996	4.31608	-1.23031	2	1.48444	N/A	N/A
245	NLGN2	0.033	0.325866	2.96007	3.85889	2.34337	2	0.23514	N/A	N/A
246	NLGN2	0.017	0.325447	3.00686	3.83165	2.47453	2	2.30941	N/A	N/A
247	NLGN2	0.1	0.325342	3.53926	3.15335	4.73501	3	0.694861	N/A	N/A
248	NLGN2	0.139	0.318302	2.45725	4.40427	0.215227	2	0.650296	N/A	N/A
249	NLGN2	0.276	0.312898	1.71838	4.42109	-4.25497	2	1.17218	N/A	N/A
250	NLGN2	0.127	0.310449	2.57299	4.04175	0.953822	2	1.25781	N/A	N/A
251	NLGN2	0.052	0.302291	1.69202	4.3724	-3.96475	2	1.21051	N/A	N/A
252	NLGN2	0.116	0.302023	2.2431	4.43153	-0.417517	2	0.479367	N/A	N/A
253	NLGN2	0.278	0.295497	1.28237	4.19873	-5.4047	2	1.11597	N/A	N/A
254	NLGN2	0.206	0.291828	3.37124	3.53458	4.09074	3	1.87161	N/A	N/A
255	NLGN2	0.135	0.281137	2.80222	3.95535	1.94328	2	1.77505	N/A	N/A
256	NLGN2	0.187	0.27765	5.96749	0.231541	9.21219	3	1.25893	N/A	N/A
257	NLGN2	0.494	0.277597	2.25615	4.23294	-0.954779	2	1.51335	N/A	N/A
258	NLGN2	0.131	0.268372	1.12023	3.96878	-6.0173	2	0.739589	N/A	N/A
259	NLGN2	0.185	0.26777	1.58867	4.40462	-4.33536	2	1.13379	N/A	N/A
260	NLGN2	0.216	0.266207	2.17353	4.3615	-1.06762	2	0.795269	N/A	N/A
261	NLGN2	0.293	0.249807	3.83137	2.75726	6.987	3	1.43362	N/A	N/A
262	NLGN2	0.563	0.228893	2.94959	3.759	1.91593	2	1.48003	N/A	N/A
263	NLGN2	0.199	0.216522	2.93062	3.93738	2.23323	2	0.392609	N/A	N/A
264	NLGN2	0.151	0.213543	1.63356	4.44556	-4.24681	2	0.836161	N/A	N/A
265	NLGN2	0.079	0.212026	2.75606	4.14263	1.79037	2	0.665568	N/A	N/A
266	NLGN2	0.1	0.207957	2.14958	4.49998	-1.14048	2	0.659107	N/A	N/A
267	NLGN2	0.172	0.206516	3.91623	2.83675	7.11822	3	0.966271	N/A	N/A
268	NLGN2	0.133	0.1964	3.18528	3.75758	3.86859	3	0.635744	N/A	N/A
269	NLGN2	0.133	0.192235	3.03352	3.92255	2.42899	2	0.373285	N/A	N/A
270	NLGN2	0.054	0.186875	2.50872	4.48216	0.276857	2	1.81368	N/A	N/A
271	NLGN2	0.081	0.173862	4.00693	2.87035	7.18521	3	1.37921	N/A	N/A
272	NLGN2	0.251	0.171274	4.39333	2.0664	8.12316	3	1.47042	N/A	N/A
273	NLGN2	0.147	0.165498	2.24484	4.51245	-0.374197	2	0.513053	N/A	N/A
274	NLGN2	0.118	0.164975	1.14882	4.20143	-6.07589	2	1.41666	N/A	N/A
275	NLGN2	0.197	0.161266	1.66623	4.46498	-4.20687	2	0.710984	N/A	N/A
276	NLGN2	0.189	0.160074	1.6644	4.47863	-4.18451	2	0.927191	N/A	N/A
277	NLGN2	0.023	0.149798	2.69242	4.20169	1.76951	2	0.396622	N/A	N/A
278	NLGN2	0.095	0.145515	1.48781	4.3781	-4.87991	2	0.974419	N/A	N/A
279	NLGN2	0.064	0.137704	1.96526	4.51221	-1.80407	2	0.992907	N/A	N/A
280	NLGN2	0.218	0.128478	2.69965	4.18469	1.67862	2	0.786924	N/A	N/A
281	NLGN2	0.068	0.121636	5.10579	1.36186	9.07966	3	0.837213	N/A	N/A
282	NLGN2	0.096	0.120531	2.74441	4.17025	1.79199	2	1.47859	N/A	N/A
283	NLGN2	0.206	0.0861957	3.31445	3.75499	3.99208	3	1.0854	N/A	N/A
284	NLGN2	0.122	0.0812912	0.947759	4.01344	-6.57087	2	0.782784	N/A	N/A
285	NLGN2	0.206	0.0599952	3.46444	3.60802	4.22771	3	1.63726	N/A	N/A
286	NLGN2	0.187	0.052534	2.02316	4.56727	-1.6399	2	1.50065	N/A	N/A
287	NLGN2	0.286	0.0496752	3.82325	2.85803	7.01561	3	0.864985	N/A	N/A
288	NLGN2	0.141	0.0490992	1.75205	4.53414	-4.14871	2	0.922697	N/A	N/A
289	NLGN2	0.108	0.0489546	1.23435	4.29752	-6.08043	2	0.789574	N/A	N/A
290	NLGN2	0.261	0.0459386	2.50494	4.43593	0.508806	2	1.78935	N/A	N/A
291	NLGN2	0.056	0.0338082	1.2398	4.2963	-6.08393	2	0.688642	N/A	N/A
292	NLGN2	0.125	0.0272654	1.32123	4.30101	-6.07627	2	0.884817	N/A	N/A
293	NLGN2	0.041	0.0213505	2.33804	4.50232	-0.106614	2	0.136883	N/A	N/A
294	IGSF9b	0.152	5.86804	1.93206	-6.54325	1.55494	1	N/A	1.19323	N/A
295	IGSF9b	0.168	5.46301	2.7545	-6.52798	1.59092	1	N/A	1.33698	N/A
296	IGSF9b	0.044	5.37206	1.42031	-6.49383	1.46739	1	N/A	0.36321	N/A
297	IGSF9b	0.093	4.75607	4.48264	-4.25686	2.15756	1	N/A	1.8663	N/A
298	IGSF9b	0.199	4.6833	2.04722	-6.41918	1.42544	1	N/A	1.10396	N/A
299	IGSF9b	0.087	4.64266	2.09732	-6.39325	1.39893	1	N/A	0.559776	N/A
300	IGSF9b	0.077	4.46447	2.13509	-6.30095	1.32914	1	N/A	0.802552	N/A
301	IGSF9b	0.056	4.16317	2.5159	-5.61353	1.21048	1	N/A	1.00563	N/A
302	IGSF9b	0.156	4.02199	2.33067	-5.59769	1.0498	1	N/A	0.561382	N/A
303	IGSF9b	0.284	3.98523	3.39293	-4.28935	2.00368	1	N/A	0.419931	N/A
304	IGSF9b	0.096	3.90311	1.01706	-6.37207	-1.35332	1	N/A	0.607702	N/A
305	IGSF9b	0.166	3.84713	3.99697	-4.12703	2.21981	1	N/A	0.294025	N/A
306	IGSF9b	0.164	3.82494	1.96308	-5.65885	0.639495	1	N/A	1.17362	N/A
307	IGSF9b	0.095	3.60016	0.57294	-6.4149	-1.62325	1	N/A	0.188978	N/A
308	IGSF9b	0.106	3.41647	0.881439	-6.42857	-1.62172	1	N/A	0.540089	N/A
309	IGSF9b	0.16	3.40547	3.88296	-4.03579	2.24744	1	N/A	1.07319	N/A
310	IGSF9b	0.131	3.36896	2.38351	-4.88237	0.84488	1	N/A	0.672826	N/A
311	IGSF9b	0.042	3.26933	0.989264	-6.40692	-1.67716	1	N/A	0.481011	N/A
312	IGSF9b	0.199	3.25463	1.03084	-6.40463	-1.67775	1	N/A	0.951045	N/A
313	IGSF9b	0.137	3.23324	1.56436	-5.80036	-1.13016	1	N/A	0.7247	N/A
314	IGSF9b	0.334	3.23172	3.86861	-3.97446	2.25813	1	N/A	1.27653	N/A
315	IGSF9b	0.243	3.19187	0.952435	-6.35898	-1.73013	1	N/A	0.340102	N/A
316	IGSF9b	0.324	3.17104	1.68849	-5.59393	-1.01688	1	N/A	0.587356	N/A
317	IGSF9b	0.195	3.13884	2.03792	-4.99382	-0.134844	1	N/A	0.213407	N/A
318	IGSF9b	0.359	3.09969	2.66461	-4.43253	1.014	1	N/A	0.542811	N/A
319	IGSF9b	0.102	3.08853	2.32482	-4.7695	0.245913	1	N/A	1.34633	N/A
320	IGSF9b	0.108	3.05409	1.96344	-4.96857	-0.177691	1	N/A	0.240033	N/A
321	IGSF9b	0.28	3.04856	1.99259	-4.91534	-0.123874	1	N/A	1.25977	N/A
322	IGSF9b	0.316	3.03917	1.4787	-5.69504	-1.51494	1	N/A	0.777702	N/A
323	IGSF9b	0.288	2.95725	1.11488	-6.0519	-1.95187	1	N/A	0.421193	N/A
324	IGSF9b	0.193	2.89487	1.79355	-5.09921	-1.14315	1	N/A	0.369492	N/A
325	IGSF9b	0.075	2.84802	1.04294	-5.8815	-2.36406	1	N/A	0.879748	N/A
326	IGSF9b	0.035	2.81724	0.624419	-5.90925	-2.80792	1	N/A	0.380963	N/A
327	IGSF9b	0.178	2.8006	1.58356	-5.19873	-1.40885	1	N/A	0.329903	N/A
328	IGSF9b	0.166	2.77598	2.26584	-4.54435	-0.106773	1	N/A	0.305311	N/A
329	IGSF9b	0.064	2.75762	1.38174	-5.45175	-1.66548	1	N/A	0.632528	N/A
330	IGSF9b	0.042	2.74546	1.06661	-5.78026	-2.57699	1	N/A	0.761761	N/A
331	IGSF9b	0.133	2.74271	0.602152	-5.85628	-2.84795	1	N/A	0.222273	N/A
332	IGSF9b	0.108	2.70552	1.81445	-4.77292	-1.25347	1	N/A	0.624255	N/A
333	IGSF9b	0.116	2.69527	2.17985	-4.47067	-0.23387	1	N/A	0.288753	N/A
334	IGSF9b	0.16	2.69093	0.733434	-5.79661	-2.93871	1	N/A	0.471782	N/A
335	IGSF9b	0.054	2.67688	1.67738	-4.85055	-1.40121	1	N/A	0.965952	N/A
336	IGSF9b	0.174	2.66689	3.49661	-3.55674	2.08956	1	N/A	0.80211	N/A
337	IGSF9b	0.052	2.64824	1.1916	-5.63505	-2.52701	1	N/A	0.444568	N/A
338	IGSF9b	0.066	2.63504	0.887094	-5.75915	-2.93003	1	N/A	0.392142	N/A
339	IGSF9b	0.095	2.62413	1.71939	-4.78372	-1.35293	1	N/A	0.264306	N/A
340	IGSF9b	0.463	2.61875	1.41395	-3.95532	-2.53101	1	N/A	0.413715	N/A
341	IGSF9b	0.154	2.61211	1.7113	-4.83959	-1.41566	1	N/A	0.62608	N/A
342	IGSF9b	0.12	2.55494	0.769753	-5.774	-2.97707	1	N/A	0.33728	N/A
343	IGSF9b	0.197	2.54521	2.01293	-4.00354	-0.894029	1	N/A	1.0395	N/A
344	IGSF9b	0.179	2.5414	3.82267	-3.57883	2.4352	1	N/A	1.50014	N/A
345	IGSF9b	0.068	2.54095	1.66951	-4.72948	-1.56059	1	N/A	0.441726	N/A
346	IGSF9b	0.438	2.53042	2.99	-3.36241	1.24383	1	N/A	0.849343	N/A
347	IGSF9b	0.181	2.51842	2.53232	-3.33253	0.191493	1	N/A	2.39164	N/A
348	IGSF9b	0.17	2.47603	2.30318	-3.46901	-0.175115	1	N/A	0.668357	N/A
349	IGSF9b	0.106	2.45593	1.18003	-4.966	-3.01796	1	N/A	0.668753	N/A
350	IGSF9b	0.438	2.44074	3.02307	-3.23553	1.30012	1	N/A	0.854164	N/A
351	IGSF9b	0.152	2.40589	0.793898	-5.67027	-3.1357	1	N/A	0.374568	N/A
352	IGSF9b	0.268	2.40547	1.65125	-3.72266	-2.48705	1	N/A	0.269101	N/A
353	IGSF9b	0.073	2.3495	1.91751	-3.54601	-1.10818	1	N/A	0.303403	N/A
354	IGSF9b	0.243	2.33517	2.60904	-3.23344	0.252372	1	N/A	0.888307	N/A
355	IGSF9b	0.048	2.32454	0.693713	-5.68459	-3.19217	1	N/A	0.727707	N/A
356	IGSF9b	0.087	2.30965	2.0181	-3.47962	-1.00928	1	N/A	0.411798	N/A
357	IGSF9b	0.241	2.29987	1.18525	-3.92829	-3.17249	1	N/A	0.486061	N/A
358	IGSF9b	0.031	2.29723	1.42226	-3.70427	-2.87967	1	N/A	0.21837	N/A
359	IGSF9b	0.176	2.29496	2.60984	-3.19624	0.344089	1	N/A	0.794987	N/A
360	IGSF9b	0.143	2.29455	1.58471	-3.70443	-2.656	1	N/A	0.391155	N/A
361	IGSF9b	0.124	2.27709	2.38603	-3.16867	-0.0745552	1	N/A	0.259646	N/A
362	IGSF9b	0.183	2.27493	4.09356	-3.5689	3.12229	1	N/A	0.380025	N/A
363	IGSF9b	0.037	2.24155	0.97996	-5.52866	-3.25459	1	N/A	1.07608	N/A
364	IGSF9b	0.307	2.22586	2.96075	-3.06727	1.27032	1	N/A	0.910712	N/A
365	IGSF9b	0.039	2.22003	4.14077	-3.56896	3.20181	1	N/A	0.44125	N/A
366	IGSF9b	0.002	2.21808	4.32193	-3.59001	3.20046	1	N/A	0.906667	N/A
367	IGSF9b	0.274	2.19999	4.19608	-3.53283	3.24228	1	N/A	0.793849	N/A
368	IGSF9b	0.183	2.18794	0.766757	-5.60148	-3.30492	1	N/A	0.778276	N/A
369	IGSF9b	0.083	2.16708	1.21475	-3.55861	-3.30999	1	N/A	0.407126	N/A
370	IGSF9b	0.164	2.16022	4.07724	-3.59891	3.17051	1	N/A	0.206832	N/A
371	IGSF9b	0.245	2.05357	1.22368	-3.34284	-3.40318	1	N/A	0.463977	N/A
372	IGSF9b	0.096	2.04534	3.49583	-2.58867	2.15371	1	N/A	0.60708	N/A
373	IGSF9b	0.251	2.02683	1.87151	-2.80988	-2.0317	1	N/A	0.407678	N/A
374	IGSF9b	0.168	2.01467	1.42625	-3.00362	-3.21812	1	N/A	0.593003	N/A
375	IGSF9b	0.071	2.01052	2.0919	-2.6997	-0.997008	1	N/A	0.33368	N/A
376	IGSF9b	0.083	2.00239	2.30725	-2.81505	-0.249104	1	N/A	0.306234	N/A
377	IGSF9b	0.145	1.99571	1.70938	-2.83156	-2.32167	1	N/A	0.53181	N/A
378	IGSF9b	0.753	1.97644	3.50965	-2.80334	2.04785	1	N/A	0.926582	N/A
379	IGSF9b	0.116	1.95019	1.42085	-2.81	-3.29202	1	N/A	0.115926	N/A
380	IGSF9b	0.029	1.94772	2.13277	-2.65402	-1.01555	1	N/A	0.748022	N/A
381	IGSF9b	0.434	1.91759	2.16946	-2.35216	-1.58942	1	N/A	0.738207	N/A
382	IGSF9b	0.172	1.90819	2.10118	-2.52646	-1.29596	1	N/A	1.37985	N/A
383	IGSF9b	0.465	1.90381	1.46537	-2.67571	-2.89102	1	N/A	0.580459	N/A
384	IGSF9b	0.255	1.88511	2.44531	-2.71934	0.136325	1	N/A	1.09715	N/A
385	IGSF9b	0.11	1.86469	1.85524	-2.48593	-1.94648	1	N/A	1.02413	N/A
386	IGSF9b	0.189	1.84609	3.09617	-2.2389	1.70649	1	N/A	0.939358	N/A
387	IGSF9b	0.037	1.81339	0.911623	-2.06249	-5.08115	2	N/A	0.643575	N/A
388	IGSF9b	0.125	1.8123	0.870956	-2.1089	-5.03005	2	N/A	0.658437	N/A
389	IGSF9b	0.133	1.8092	3.60539	-2.44623	2.39173	1	N/A	0.373292	N/A
390	IGSF9b	0.295	1.79751	1.99923	-2.31631	-1.76398	1	N/A	1.13198	N/A
391	IGSF9b	0.235	1.7952	0.49157	-2.1044	-5.21379	2	N/A	0.414494	N/A
392	IGSF9b	0.054	1.78464	3.22913	-2.22125	1.92048	1	N/A	0.396378	N/A
393	IGSF9b	0.062	1.78311	0.668318	-2.08905	-5.18498	2	N/A	0.263	N/A
394	IGSF9b	0.075	1.78151	0.965943	-2.04721	-5.02343	2	N/A	0.282081	N/A
395	IGSF9b	0.303	1.77961	1.68863	-2.63253	-2.37657	1	N/A	0.658929	N/A
396	IGSF9b	0.205	1.76862	1.17643	-1.98547	-4.34344	2	N/A	0.37615	N/A
397	IGSF9b	0.347	1.76293	1.25274	-2.16483	-3.98951	1	N/A	0.691193	N/A
398	IGSF9b	0.048	1.76105	2.57129	-2.59215	0.297944	1	N/A	0.262833	N/A
399	IGSF9b	0.062	1.76079	1.66374	-2.49332	-2.56223	1	N/A	3.68602	N/A
400	IGSF9b	0.76	1.76025	3.94132	-2.61642	2.69397	1	N/A	0.867578	N/A
401	IGSF9b	0.114	1.74831	1.65598	-2.45277	-2.56927	1	N/A	1.09142	N/A
402	IGSF9b	0.066	1.74139	0.762518	-2.06486	-5.14997	2	N/A	0.347774	N/A
403	IGSF9b	0.079	1.73763	1.25849	-1.85081	-4.17363	2	N/A	0.44139	N/A
404	IGSF9b	0.257	1.72463	1.23814	-1.99241	-4.22544	2	N/A	0.362707	N/A
405	IGSF9b	0.108	1.71749	0.864504	-2.03677	-5.103	2	N/A	0.34032	N/A
406	IGSF9b	0.091	1.71545	4.17776	-3.38548	3.46296	1	N/A	0.449505	N/A
407	IGSF9b	0.179	1.7114	1.09365	-1.91054	-4.5601	2	N/A	0.620487	N/A
408	IGSF9b	0.052	1.70416	1.21187	-1.76107	-4.32849	2	N/A	0.305867	N/A
409	IGSF9b	0.152	1.69478	1.07121	-1.86263	-4.63315	2	N/A	0.209002	N/A
410	IGSF9b	0.228	1.68032	3.6298	-2.43298	2.51179	1	N/A	0.581412	N/A
411	IGSF9b	0.65	1.67021	1.75291	-1.14685	-2.35362	2	N/A	1.56838	N/A
412	IGSF9b	0.538	1.66123	3.76978	-2.57235	2.73359	1	N/A	1.01165	N/A
413	IGSF9b	0.16	1.65528	0.725128	-2.03373	-5.15721	2	N/A	0.39897	N/A
414	IGSF9b	0.282	1.63362	0.943973	-1.71186	-4.83073	2	N/A	1.57476	N/A
415	IGSF9b	0.073	1.61381	1.301	-1.54341	-4.13087	2	N/A	2.28467	N/A
416	IGSF9b	0.212	1.59362	3.13941	-2.11044	1.80719	1	N/A	0.640391	N/A
417	IGSF9b	0.05	1.56902	1.39695	-1.41535	-3.98235	2	N/A	0.549103	N/A
418	IGSF9b	0.162	1.56113	1.50912	-1.21873	-3.77368	2	N/A	0.608214	N/A
419	IGSF9b	0.187	1.54473	0.721601	-1.95373	-5.19815	2	N/A	1.16023	N/A
420	IGSF9b	0.201	1.53981	4.09324	-3.23773	3.48627	1	N/A	0.5098	N/A
421	IGSF9b	0.087	1.53661	1.15307	-1.22805	-4.60887	2	N/A	0.387324	N/A
422	IGSF9b	0.45	1.51056	1.78501	-0.757784	-2.34802	2	N/A	0.997816	N/A
423	IGSF9b	0.137	1.48965	4.44227	-3.28642	3.56607	1	N/A	0.520596	N/A
424	IGSF9b	0.129	1.48492	2.10599	0.269577	-0.991592	2	N/A	1.04887	N/A
425	IGSF9b	0.205	1.47064	1.88923	-0.181476	-2.10747	2	N/A	0.284075	N/A
426	IGSF9b	0.041	1.46844	1.04639	-1.02382	-4.84278	2	N/A	0.203115	N/A
427	IGSF9b	0.158	1.46481	1.15646	-1.12267	-4.54518	2	N/A	0.520982	N/A
428	IGSF9b	0.201	1.44282	1.87565	-0.196224	-2.10729	2	N/A	0.509381	N/A
429	IGSF9b	0.174	1.43235	1.10674	-0.986346	-4.6455	2	N/A	0.630661	N/A
430	IGSF9b	0.174	1.43235	1.10674	-1.0288	-4.73509	2	N/A	0.630661	N/A
431	IGSF9b	0.1	1.42757	2.41876	0.672448	-0.103371	2	N/A	0.307885	N/A
432	IGSF9b	0.145	1.40914	1.10185	-0.953377	-4.66496	2	N/A	0.880532	N/A
433	IGSF9b	0.565	1.40887	3.80687	-2.50751	2.74922	1	N/A	0.32785	N/A
434	IGSF9b	0.056	1.38375	1.11037	-0.932848	-4.71476	2	N/A	0.282379	N/A
435	IGSF9b	0.284	1.37959	2.41288	0.632737	-0.092174	2	N/A	0.528037	N/A
436	IGSF9b	0.311	1.3579	1.40649	-0.196309	-3.64077	2	N/A	0.253703	N/A
437	IGSF9b	0.093	1.35759	1.25553	-0.538801	-4.21226	2	N/A	0.610125	N/A
438	IGSF9b	0.151	1.33785	3.15493	1.16535	3.60891	3	N/A	1.35089	N/A
439	IGSF9b	0.154	1.33574	3.33271	1.1024	3.87964	3	N/A	0.336423	N/A
440	IGSF9b	0.384	1.2967	3.5148	1.04372	4.2526	3	N/A	0.754139	N/A
441	IGSF9b	0.239	1.28439	3.1537	1.21226	3.5786	3	N/A	1.06033	N/A
442	IGSF9b	0.147	1.2837	0.980551	-0.916043	-4.98801	2	N/A	1.12298	N/A
443	IGSF9b	0.149	1.2638	1.60945	-0.060159	-3.24809	2	N/A	0.916008	N/A
444	IGSF9b	0.066	1.26368	1.4678	-0.0822279	-3.67005	2	N/A	0.206608	N/A
445	IGSF9b	0.262	1.2527	2.60683	0.82411	0.465512	2	N/A	0.451184	N/A
446	IGSF9b	0.147	1.2462	0.698867	-0.654695	-5.23392	2	N/A	0.403046	N/A
447	IGSF9b	0.062	1.21633	1.63725	0.00379733	-3.17456	2	N/A	0.205187	N/A
448	IGSF9b	0.087	1.21303	3.2302	1.18235	3.71826	3	N/A	0.764841	N/A
449	IGSF9b	0.179	1.21214	0.739977	-0.6005	-5.28408	2	N/A	0.392536	N/A
450	IGSF9b	0.295	1.20775	3.33338	1.18403	3.8229	3	N/A	0.357765	N/A
451	IGSF9b	0.135	1.2076	1.50479	0.111147	-3.57059	2	N/A	0.349024	N/A
452	IGSF9b	0.041	1.20323	2.23738	1.14759	-0.249979	2	N/A	0.680298	N/A
453	IGSF9b	0.112	1.20151	2.38326	0.985583	0.0882085	2	N/A	2.50522	N/A
454	IGSF9b	0.156	1.17248	1.82768	0.486508	-2.08435	2	N/A	0.782021	N/A
455	IGSF9b	0.056	1.14749	1.9763	0.668335	-1.78929	2	N/A	0.902957	N/A
456	IGSF9b	0.151	1.13455	3.06489	1.40219	3.3947	3	N/A	1.08396	N/A
457	IGSF9b	0.035	1.13311	4.80678	0.484462	8.15425	3	N/A	1.78718	N/A
458	IGSF9b	0.044	1.125	2.01777	0.747297	-1.78115	2	N/A	0.265819	N/A
459	IGSF9b	0.056	1.1202	0.621106	-0.45442	-5.39713	2	N/A	0.453494	N/A
460	IGSF9b	0.552	1.11618	3.05064	1.51333	3.29811	3	N/A	0.549197	N/A
461	IGSF9b	0.208	1.11112	1.93724	0.757612	-2.02997	2	N/A	0.427089	N/A
462	IGSF9b	0.075	1.10505	4.70244	0.592765	8.08024	3	N/A	0.312551	N/A
463	IGSF9b	0.071	1.08968	1.98939	0.770995	-1.84367	2	N/A	0.4825	N/A
464	IGSF9b	0.052	1.08804	1.95649	0.82285	-1.89582	2	N/A	0.410185	N/A
465	IGSF9b	0.122	1.08026	3.49622	1.18612	4.90277	3	N/A	0.352315	N/A
466	IGSF9b	0.214	1.06934	3.13314	1.5096	3.51507	3	N/A	1.26672	N/A
467	IGSF9b	0.083	1.06183	3.5923	1.16621	4.99538	3	N/A	0.635829	N/A
468	IGSF9b	0.087	1.06087	1.39542	0.754773	-3.83529	2	N/A	0.209204	N/A
469	IGSF9b	0.143	1.05458	3.54215	1.20003	5.0045	3	N/A	0.685363	N/A
470	IGSF9b	0.185	1.04425	1.97782	0.852039	-2.00868	2	N/A	0.752056	N/A
471	IGSF9b	0.158	1.03683	3.83276	1.42278	5.70377	3	N/A	1.70935	N/A
472	IGSF9b	0.1	1.00996	4.28994	1.05708	7.63684	3	N/A	0.675604	N/A
473	IGSF9b	0.803	0.99136	2.87053	1.72425	2.9376	3	N/A	1.03187	N/A
474	IGSF9b	0.062	0.990289	2.70944	2.06301	2.48649	3	N/A	0.400013	N/A
475	IGSF9b	0.091	0.989054	3.78932	1.49125	5.61689	3	N/A	0.174135	N/A
476	IGSF9b	0.139	0.981038	2.23118	1.83294	-0.202118	2	N/A	0.318008	N/A
477	IGSF9b	0.129	0.964395	1.48321	0.991091	-3.81994	2	N/A	0.193459	N/A
478	IGSF9b	0.247	0.960636	3.84907	1.5333	5.80334	3	N/A	0.372891	N/A
479	IGSF9b	0.154	0.949501	3.02026	2.02223	2.92827	3	N/A	0.908127	N/A
480	IGSF9b	0.23	0.924315	3.70661	1.57111	5.58662	3	N/A	0.641267	N/A
481	IGSF9b	0.203	0.920169	0.625729	2.4157	-6.65616	2	N/A	0.203763	N/A
482	IGSF9b	0.289	0.91122	3.35114	2.04547	3.87626	3	N/A	0.483735	N/A
483	IGSF9b	0.056	0.907099	3.76061	1.47406	5.58604	3	N/A	0.525848	N/A
484	IGSF9b	0.303	0.899185	4.73903	0.587704	8.2118	3	N/A	0.460403	N/A
485	IGSF9b	0.253	0.8986	2.92377	2.11377	2.74674	3	N/A	0.672464	N/A
486	IGSF9b	0.33	0.897261	3.59742	1.66096	5.54592	3	N/A	0.468577	N/A
487	IGSF9b	0.299	0.892145	2.8321	2.05637	2.62943	3	N/A	1.51359	N/A
488	IGSF9b	0.127	0.888354	3.6436	1.50138	5.45709	3	N/A	0.462837	N/A
489	IGSF9b	0.234	0.888204	1.00724	2.56037	-6.29962	2	N/A	0.704014	N/A
490	IGSF9b	0.141	0.885066	3.89313	1.553	5.90078	3	N/A	0.893047	N/A
491	IGSF9b	0.112	0.882959	3.65091	1.46137	5.45292	3	N/A	0.578073	N/A
492	IGSF9b	0.222	0.868214	4.81355	0.565796	8.2493	3	N/A	0.448364	N/A
493	IGSF9b	0.143	0.866242	4.38939	1.10115	7.70395	3	N/A	0.14199	N/A
494	IGSF9b	0.328	0.865123	3.65726	1.79809	5.62417	3	N/A	1.14244	N/A
495	IGSF9b	0.45	0.864269	3.28531	2.04502	3.82149	3	N/A	0.604705	N/A
496	IGSF9b	0.062	0.859438	0.319989	2.48992	-6.71949	2	N/A	0.648695	N/A
497	IGSF9b	0.066	0.858469	2.72132	2.16257	2.46055	3	N/A	0.0890417	N/A
498	IGSF9b	0.069	0.858333	3.12149	2.13591	3.12073	3	N/A	0.548102	N/A
499	IGSF9b	0.137	0.853248	1.79664	2.47263	-2.54526	2	N/A	0.384839	N/A
500	IGSF9b	0.166	0.852732	3.37013	2.11548	3.9517	3	N/A	2.01578	N/A
501	IGSF9b	0.185	0.852592	3.95608	1.5917	6.04101	3	N/A	1.72144	N/A
502	IGSF9b	0.315	0.837675	3.31417	2.1232	3.91931	3	N/A	0.525363	N/A
503	IGSF9b	0.189	0.832907	0.981943	2.51298	-6.36215	2	N/A	0.766959	N/A
504	IGSF9b	0.147	0.827257	1.91847	2.61008	-2.31838	2	N/A	0.513588	N/A
505	IGSF9b	0.147	0.823228	0.792048	2.43336	-6.58796	2	N/A	0.277268	N/A
506	IGSF9b	0.054	0.809397	0.671592	2.44377	-6.70239	2	N/A	0.278074	N/A
507	IGSF9b	0.112	0.799716	3.2602	2.17685	3.81214	3	N/A	0.360056	N/A
508	IGSF9b	0.193	0.792034	2.9691	2.32904	2.82585	3	N/A	0.290583	N/A
509	IGSF9b	0.081	0.78245	1.83009	2.59042	-2.51147	2	N/A	0.508018	N/A
510	IGSF9b	0.135	0.775581	4.06898	1.88135	6.68194	3	N/A	0.232148	N/A
511	IGSF9b	0.124	0.770111	2.24811	2.82533	-1.07191	2	N/A	1.70671	N/A
512	IGSF9b	0.052	0.769283	1.95309	2.6965	-2.38401	2	N/A	0.806435	N/A
513	IGSF9b	0.158	0.766267	2.05673	2.84151	-1.987	2	N/A	0.159857	N/A
514	IGSF9b	0.318	0.764945	4.10319	1.86965	6.55452	3	N/A	0.38991	N/A
515	IGSF9b	0.096	0.749536	2.18682	2.84765	-1.23248	2	N/A	0.77439	N/A
516	IGSF9b	0.048	0.707224	0.513032	2.50402	-6.71405	2	N/A	0.25305	N/A
517	IGSF9b	0.064	0.696029	0.9971	2.84085	-6.15044	2	N/A	0.33953	N/A
518	IGSF9b	0.139	0.6876	1.56033	3.44264	-4.59154	2	N/A	0.394289	N/A
519	IGSF9b	0.075	0.687109	3.31202	2.53908	3.88465	3	N/A	0.557814	N/A
520	IGSF9b	0.762	0.682157	3.66815	1.91056	5.74409	3	N/A	0.87075	N/A
521	IGSF9b	0.264	0.663612	3.46772	2.36622	4.24799	3	N/A	0.191683	N/A
522	IGSF9b	0.164	0.654616	2.70903	3.2807	1.22205	2	N/A	0.152272	N/A
523	IGSF9b	0.112	0.651568	1.18053	2.87693	-5.94296	2	N/A	0.145438	N/A
524	IGSF9b	0.38	0.649464	3.94071	1.96935	6.12843	3	N/A	0.735289	N/A
525	IGSF9b	0.048	0.643848	3.33844	2.74248	3.92414	3	N/A	0.32403	N/A
526	IGSF9b	0.131	0.643004	4.05073	2.1103	6.91792	3	N/A	0.365945	N/A
527	IGSF9b	0.179	0.639029	1.10315	2.84937	-6.11013	2	N/A	0.126181	N/A
528	IGSF9b	0.087	0.633905	3.15406	2.8482	3.42008	3	N/A	0.401267	N/A
529	IGSF9b	0.125	0.620229	3.74085	2.61993	5.33529	3	N/A	0.229271	N/A
530	IGSF9b	0.073	0.612625	2.92613	2.65842	2.87103	3	N/A	0.143996	N/A
531	IGSF9b	0.226	0.606294	1.0515	2.86591	-6.18392	2	N/A	0.692463	N/A
532	IGSF9b	0.077	0.604669	3.14169	2.90793	3.43514	3	N/A	0.443429	N/A
533	IGSF9b	0.05	0.596349	4.44138	1.78996	7.96625	3	N/A	0.220442	N/A
534	IGSF9b	0.162	0.593707	1.59765	3.52826	-4.56892	2	N/A	0.164893	N/A
535	IGSF9b	0.16	0.592605	3.6209	2.63458	5.28502	3	N/A	0.646163	N/A
536	IGSF9b	0.162	0.588011	0.989215	2.9334	-6.29997	2	N/A	0.271151	N/A
537	IGSF9b	0.054	0.581536	2.61255	3.56165	1.19349	2	N/A	0.244003	N/A
538	IGSF9b	0.083	0.578836	4.31405	1.89778	7.73852	3	N/A	0.298769	N/A
539	IGSF9b	0.106	0.573056	3.62847	2.73427	5.20546	3	N/A	0.84063	N/A
540	IGSF9b	0.068	0.570947	3.37147	2.84006	4.00332	3	N/A	0.927717	N/A
541	IGSF9b	0.112	0.558908	1.54753	3.68552	-4.63411	2	N/A	0.197412	N/A
542	IGSF9b	0.124	0.554765	2.31631	3.95167	-0.250167	2	N/A	0.73329	N/A
543	IGSF9b	0.091	0.554399	3.25878	2.94352	3.83775	3	N/A	0.133005	N/A
544	IGSF9b	0.268	0.542266	2.65162	3.49521	1.31923	2	N/A	1.58497	N/A
545	IGSF9b	0.075	0.536961	2.01317	3.7694	-2.03218	2	N/A	0.408246	N/A
546	IGSF9b	0.096	0.525353	2.56126	3.62974	1.11153	2	N/A	0.121762	N/A
547	IGSF9b	0.324	0.523444	4.46498	1.79619	8.19153	3	N/A	0.741196	N/A
548	IGSF9b	0.143	0.523103	3.97714	2.42347	6.93575	3	N/A	0.493106	N/A
549	IGSF9b	0.166	0.522879	4.34201	1.92221	7.79892	3	N/A	0.582284	N/A
550	IGSF9b	0.046	0.522253	2.44481	3.94009	-0.0791648	2	N/A	0.508226	N/A
551	IGSF9b	0.12	0.520644	3.10873	2.97999	3.35451	3	N/A	0.635806	N/A
552	IGSF9b	0.064	0.515303	3.28698	2.97826	3.9322	3	N/A	0.568202	N/A
553	IGSF9b	0.112	0.514584	3.21678	3.06181	3.75986	3	N/A	0.222428	N/A
554	IGSF9b	0.11	0.514337	3.36628	2.99679	4.08691	3	N/A	0.986041	N/A
555	IGSF9b	0.081	0.510564	3.73328	2.71984	5.29075	3	N/A	0.189948	N/A
556	IGSF9b	0.062	0.500964	2.00914	3.90864	-2.05205	2	N/A	0.658516	N/A
557	IGSF9b	0.048	0.491144	1.87046	4.05551	-2.38764	2	N/A	1.08859	N/A
558	IGSF9b	0.064	0.482915	1.55366	3.85258	-4.56804	2	N/A	0.196215	N/A
559	IGSF9b	0.089	0.479711	1.32385	3.854	-5.31383	2	N/A	2.15885	N/A
560	IGSF9b	0.077	0.478732	2.7408	3.60178	1.52953	2	N/A	0.245102	N/A
561	IGSF9b	0.085	0.477729	4.35626	1.87267	7.88936	3	N/A	0.784553	N/A
562	IGSF9b	0.071	0.476725	1.50186	3.85077	-4.68637	2	N/A	1.18313	N/A
563	IGSF9b	0.195	0.471993	4.55609	1.71214	8.34345	3	N/A	0.261276	N/A
564	IGSF9b	0.071	0.470673	1.83302	4.04861	-2.62569	2	N/A	0.270171	N/A
565	IGSF9b	0.152	0.463968	3.39114	3.15437	4.20605	3	N/A	0.304781	N/A
566	IGSF9b	0.203	0.463369	1.4781	3.78667	-4.82431	2	N/A	0.30982	N/A
567	IGSF9b	0.102	0.45593	3.26868	3.20644	3.7943	3	N/A	0.302038	N/A
568	IGSF9b	0.054	0.455854	0.541622	3.73909	-6.90224	2	N/A	2.01533	N/A
569	IGSF9b	0.145	0.454495	3.46525	3.13375	4.39214	3	N/A	2.143	N/A
570	IGSF9b	0.087	0.451635	3.98045	2.49067	6.99786	3	N/A	0.265707	N/A
571	IGSF9b	0.179	0.447237	2.34584	4.08016	-0.271206	2	N/A	0.206314	N/A
572	IGSF9b	0.077	0.445533	2.66172	3.6325	1.38676	2	N/A	0.165802	N/A
573	IGSF9b	0.05	0.442805	2.23907	4.13275	-0.332067	2	N/A	0.474769	N/A
574	IGSF9b	0.131	0.438305	1.71289	4.03909	-3.29724	2	N/A	0.266373	N/A
575	IGSF9b	0.11	0.424849	1.78415	4.06998	-2.90459	2	N/A	0.530697	N/A
576	IGSF9b	0.152	0.412714	2.85741	3.75224	1.98688	2	N/A	0.916161	N/A
577	IGSF9b	0.05	0.406791	4.31573	1.88808	7.89368	3	N/A	0.378173	N/A
578	IGSF9b	0.152	0.405681	4.74442	1.33071	8.86861	3	N/A	1.29461	N/A
579	IGSF9b	0.002	0.392233	4.83357	1.40045	8.94957	3	N/A	1.77333	N/A
580	IGSF9b	0.318	0.386251	4.14199	2.62341	7.13588	3	N/A	0.297508	N/A
581	IGSF9b	0.16	0.384788	4.7856	1.32741	8.87837	3	N/A	1.3358	N/A
582	IGSF9b	0.218	0.384155	3.34634	3.33969	4.15227	3	N/A	0.595034	N/A
583	IGSF9b	0.093	0.379403	4.04186	2.67565	7.15728	3	N/A	0.562507	N/A
584	IGSF9b	0.149	0.370683	1.9143	4.20025	-2.24634	2	N/A	0.404416	N/A
585	IGSF9b	0.17	0.364348	3.06903	3.77753	2.45595	2	N/A	0.374329	N/A
586	IGSF9b	0.064	0.348587	0.35371	3.7689	-6.94991	2	N/A	0.856465	N/A
587	IGSF9b	0.093	0.33992	4.76427	1.43815	8.93292	3	N/A	0.951498	N/A
588	IGSF9b	0.068	0.338212	4.32601	1.95641	7.87146	3	N/A	0.579298	N/A
589	IGSF9b	0.218	0.337841	2.10981	4.31932	-1.22666	2	N/A	0.371811	N/A
590	IGSF9b	0.164	0.334033	0.843004	3.89385	-6.74523	2	N/A	0.157248	N/A
591	IGSF9b	0.195	0.330588	4.4938	1.8167	8.23948	3	N/A	1.0761	N/A
592	IGSF9b	0.06	0.325381	0.67558	3.78821	-6.93118	2	N/A	0.62615	N/A
593	IGSF9b	0.149	0.323625	2.78961	3.84596	1.85625	2	N/A	0.329911	N/A
594	IGSF9b	0.073	0.323611	3.33543	3.54041	3.97282	3	N/A	0.619009	N/A
595	IGSF9b	0.125	0.318764	0.935313	3.89501	-6.66268	2	N/A	0.892165	N/A
596	IGSF9b	0.16	0.316821	4.74272	1.41576	8.92511	3	N/A	0.768622	N/A
597	IGSF9b	0.087	0.311066	1.26726	4.09951	-5.51777	2	N/A	0.0816963	N/A
598	IGSF9b	0.133	0.310799	3.31259	3.53112	4.01539	3	N/A	0.669182	N/A
599	IGSF9b	0.096	0.310446	1.65816	4.34887	-4.05376	2	N/A	0.170843	N/A
600	IGSF9b	0.091	0.306164	0.603891	3.79806	-6.94391	2	N/A	0.295294	N/A
601	IGSF9b	0.089	0.299481	1.6936	4.40763	-4.00408	2	N/A	0.397851	N/A
602	IGSF9b	0.069	0.297353	3.74093	3.00877	5.1101	3	N/A	0.357475	N/A
603	IGSF9b	0.037	0.295062	0.805691	3.86801	-6.85691	2	N/A	0.812719	N/A
604	IGSF9b	0.255	0.286455	2.00163	4.37061	-1.43773	2	N/A	0.442474	N/A
605	IGSF9b	0.149	0.274135	4.0328	2.79193	7.18424	3	N/A	0.396397	N/A
606	IGSF9b	0.278	0.268659	4.05458	2.70408	7.1505	3	N/A	0.375913	N/A
607	IGSF9b	0.046	0.267917	1.97754	4.50832	-1.81259	2	N/A	0.271528	N/A
608	IGSF9b	0.1	0.259813	1.46829	4.35292	-4.9642	2	N/A	0.136824	N/A
609	IGSF9b	0.066	0.255809	4.83357	1.41107	8.98311	3	N/A	0.209105	N/A
610	IGSF9b	0.095	0.25113	3.95421	2.84484	7.15375	3	N/A	0.913874	N/A
611	IGSF9b	0.085	0.251088	2.43049	4.48354	0.1337	2	N/A	0.270864	N/A
612	IGSF9b	0.093	0.248738	2.32439	4.50393	-0.135209	2	N/A	0.571724	N/A
613	IGSF9b	0.05	0.244047	4.80659	1.43417	8.98043	3	N/A	0.715801	N/A
614	IGSF9b	0.096	0.241434	1.39089	4.31534	-5.15964	2	N/A	0.151262	N/A
615	IGSF9b	0.069	0.234717	1.85724	4.48986	-1.99727	2	N/A	0.258859	N/A
616	IGSF9b	0.096	0.227995	2.03154	4.50501	-1.62085	2	N/A	0.405858	N/A
617	IGSF9b	0.064	0.218075	1.85659	4.46332	-2.01741	2	N/A	1.16726	N/A
618	IGSF9b	0.351	0.207792	2.67562	4.06298	1.63795	2	N/A	0.438265	N/A
619	IGSF9b	0.127	0.204592	1.72427	4.47585	-4.16742	2	N/A	0.503447	N/A
620	IGSF9b	0.174	0.200512	3.15293	3.77918	3.79416	3	N/A	0.405309	N/A
621	IGSF9b	0.222	0.188179	0.645902	3.77552	-6.9563	2	N/A	0.817284	N/A
622	IGSF9b	0.068	0.167867	3.97305	2.90545	7.20592	3	N/A	0.625071	N/A
623	IGSF9b	0.031	0.100598	0.906673	3.97118	-6.66134	2	N/A	0.217396	N/A
624	IGSF9b	0.127	0.0986366	4.64368	1.49502	8.92404	3	N/A	1.92747	N/A
625	IGSF9b	0.158	0.0935984	4.20725	2.738	7.3245	3	N/A	0.426874	N/A
626	IGSF9b	0.05	0.0822152	2.72645	4.17972	1.76191	2	N/A	0.583407	N/A
627	IGSF9b	0.154	0.0741493	1.26866	4.29851	-6.05281	2	N/A	1.03048	N/A
628	IGSF9b	0.122	0.0593801	1.13349	4.25393	-6.13233	2	N/A	0.0508373	N/A
629	IGSF9b	0.147	0.0495523	2.77335	4.22831	1.78698	2	N/A	0.447533	N/A
630	TEN2	0.029	0.296258	6.58395	0.169325	9.27551	3	N/A	N/A	0.460339
631	TEN2	0.124	0.773169	6.1471	0.213421	9.26168	3	N/A	N/A	0.466159
632	TEN2	0.039	1.3433	6.11709	0.217907	9.17136	3	N/A	N/A	0.474946
633	TEN2	0.064	0.62868	6.07053	0.186184	9.26248	3	N/A	N/A	0.494949
634	TEN2	0.168	1.08351	5.98118	0.216608	9.16311	3	N/A	N/A	0.461433
635	TEN2	0.064	0.22336	5.11631	1.37547	9.07034	3	N/A	N/A	0.548448
636	TEN2	0.394	2.20425	5.04665	-3.72295	3.29446	1	N/A	N/A	0.330644
637	TEN2	0.264	0.490058	5.02654	1.22967	9.06992	3	N/A	N/A	0.514417
638	TEN2	0.116	0.506381	4.96628	1.29932	8.97214	3	N/A	N/A	0.322984
639	TEN2	0.058	0.65264	4.8378	1.22236	8.79827	3	N/A	N/A	0.270755
640	TEN2	0.027	0.416361	4.79121	1.367	8.95228	3	N/A	N/A	1.02679
641	TEN2	0.037	0.417446	4.66252	1.41055	8.82494	3	N/A	N/A	0.533674
642	TEN2	0.135	0.520583	4.59434	1.64134	8.42116	3	N/A	N/A	0.328468
643	TEN2	0.129	0.536848	4.52526	1.72766	8.25194	3	N/A	N/A	0.523565
644	TEN2	0.212	3.01503	4.43291	-3.84195	2.83817	1	N/A	N/A	0.475065
645	TEN2	0.079	0.386045	4.38242	1.88365	7.93258	3	N/A	N/A	0.306762
646	TEN2	0.232	1.73529	4.30951	-3.39249	3.56309	1	N/A	N/A	0.655802
647	TEN2	0.131	0.55487	4.30887	1.91563	7.72015	3	N/A	N/A	0.731787
648	TEN2	0.183	1.99026	4.18984	-3.45266	3.32026	1	N/A	N/A	0.299368
649	TEN2	0.089	1.71501	4.16132	-3.35735	3.49093	1	N/A	N/A	1.03281
650	TEN2	0.407	1.17859	4.15904	0.971025	7.3126	3	N/A	N/A	0.512467
651	TEN2	0.081	0.661204	4.12856	2.0281	7.0309	3	N/A	N/A	0.525457
652	TEN2	0.27	0.331399	3.96084	2.72145	7.04874	3	N/A	N/A	0.269609
653	TEN2	0.075	3.20963	3.91925	-3.99886	2.22141	1	N/A	N/A	0.793401
654	TEN2	0.695	0.285216	3.89165	2.64955	6.90409	3	N/A	N/A	0.78382
655	TEN2	0.158	2.34036	3.81056	-3.51588	2.69567	1	N/A	N/A	0.244052
656	TEN2	0.179	0.626469	3.8065	2.55167	5.43245	3	N/A	N/A	1.09424
657	TEN2	0.122	0.526072	3.7191	2.69553	5.30451	3	N/A	N/A	0.193273
658	TEN2	0.05	1.2223	3.6598	1.03281	4.81177	3	N/A	N/A	1.17519
659	TEN2	0.11	0.93111	3.65506	1.44574	5.49106	3	N/A	N/A	1.02135
660	TEN2	0.357	0.666769	3.6497	2.03157	5.57674	3	N/A	N/A	0.283852
661	TEN2	0.083	4.20508	3.60636	-4.25888	2.09445	1	N/A	N/A	0.827453
662	TEN2	0.079	0.382183	3.60319	3.03338	4.95488	3	N/A	N/A	0.146601
663	TEN2	0.187	2.69272	3.56449	-3.60943	2.15974	1	N/A	N/A	0.984421
664	TEN2	0.083	1.34015	3.56171	0.990257	4.61037	3	N/A	N/A	0.668687
665	TEN2	0.274	0.124187	3.55055	3.52233	4.45881	3	N/A	N/A	0.827311
666	TEN2	0.114	2.84745	3.5072	-3.71588	2.11615	1	N/A	N/A	0.510853
667	TEN2	0.87	2.3995	3.47163	-3.03114	1.83447	1	N/A	N/A	0.767699
668	TEN2	0.033	1.57619	3.38792	-2.09264	2.20756	1	N/A	N/A	0.544315
669	TEN2	0.174	1.30138	3.38709	1.10017	3.93757	3	N/A	N/A	0.826003
670	TEN2	0.106	0.984062	3.32373	1.93398	3.95608	3	N/A	N/A	0.413658
671	TEN2	0.033	0.256359	3.30641	3.63591	3.92993	3	N/A	N/A	0.270496
672	TEN2	0.12	0.89605	3.30428	2.04635	3.86143	3	N/A	N/A	0.596896
673	TEN2	0.243	2.34785	3.30269	-3.07885	1.66557	1	N/A	N/A	0.257421
674	TEN2	0.21	0.721723	3.28452	2.35914	3.89496	3	N/A	N/A	0.334235
675	TEN2	0.139	0.186698	3.27008	3.71869	3.93248	3	N/A	N/A	0.799948
676	TEN2	0.002	0.00849228	3.20835	3.77433	3.88822	3	N/A	N/A	0.404406
677	TEN2	0.276	1.09067	3.18857	1.44836	3.51402	3	N/A	N/A	0.490105
678	TEN2	0.133	1.77111	3.12737	-2.19136	1.75555	1	N/A	N/A	0.641892
679	TEN2	0.259	2.16285	3.09469	-2.96261	1.45724	1	N/A	N/A	0.775516
680	TEN2	0.398	2.94778	3.03685	-3.87949	1.28356	1	N/A	N/A	0.825562
681	TEN2	0.093	0.696046	3.00632	2.4954	2.90007	3	N/A	N/A	0.916283
682	TEN2	0.066	1.92385	2.98427	-2.29222	1.61962	1	N/A	N/A	0.951669
683	TEN2	0.178	2.50383	2.9769	-3.34613	1.26321	1	N/A	N/A	0.54363
684	TEN2	0.179	1.93499	2.94558	-2.28954	1.59389	1	N/A	N/A	0.484923
685	TEN2	0.417	2.11595	2.92853	-2.93853	1.33599	1	N/A	N/A	0.662206
686	TEN2	0.066	0.348014	2.92351	3.85961	2.33983	2	N/A	N/A	0.433965
687	TEN2	0.228	2.79164	2.8739	-3.75029	1.18272	1	N/A	N/A	0.702611
688	TEN2	0.11	0.774837	2.84686	2.23265	2.67167	3	N/A	N/A	0.707085
689	TEN2	0.143	0.828819	2.82069	2.17348	2.65397	3	N/A	N/A	0.963715
690	TEN2	0.345	0.443124	2.81909	3.67353	1.80888	2	N/A	N/A	0.348215
691	TEN2	0.247	1.60029	2.79778	-1.89772	1.38951	1	N/A	N/A	1.1073
692	TEN2	0.444	0.588733	2.78084	3.46028	1.76357	2	N/A	N/A	0.354863
693	TEN2	0.091	4.10782	2.77442	-5.51555	1.25383	1	N/A	N/A	0.266381
694	TEN2	0.054	2.89186	2.76674	-3.9439	1.1312	1	N/A	N/A	0.951904
695	TEN2	0.212	1.98066	2.75002	-2.7122	0.626876	1	N/A	N/A	0.41699
696	TEN2	0.133	3.51353	2.69682	-4.7484	1.05855	1	N/A	N/A	0.75327
697	TEN2	0.046	1.20399	2.61067	0.983661	0.311593	2	N/A	N/A	0.525063
698	TEN2	0.234	0.765078	2.60085	2.92307	0.737356	2	N/A	N/A	0.839037
699	TEN2	0.232	3.17992	2.59158	-4.51965	0.958587	1	N/A	N/A	0.659018
700	TEN2	0.268	1.91891	2.56176	-2.70264	0.243847	1	N/A	N/A	0.277586
701	TEN2	0.203	0.768953	2.54876	2.85294	0.56313	2	N/A	N/A	0.577805
702	TEN2	0.125	1.23318	2.52497	0.913535	0.279768	2	N/A	N/A	0.573736
703	TEN2	0.125	3.41146	2.51674	-4.82535	0.920972	1	N/A	N/A	0.751635
704	TEN2	0.216	0.720649	2.49779	2.85746	0.530141	2	N/A	N/A	0.735843
705	TEN2	0.091	0.812883	2.49037	2.62123	0.292408	2	N/A	N/A	0.297358
706	TEN2	0.104	1.09839	2.47434	1.22621	0.323597	2	N/A	N/A	0.504058
707	TEN2	0.129	2.12759	2.46203	-2.92398	-0.014809	1	N/A	N/A	1.13669
708	TEN2	0.108	0.179514	2.41995	4.53719	0.124354	2	N/A	N/A	0.532432
709	TEN2	0.156	0.52342	2.38454	3.9359	-0.220968	2	N/A	N/A	1.21272
710	TEN2	0.129	1.28606	2.36108	0.822342	-0.029315	2	N/A	N/A	0.335839
711	TEN2	0.197	0.886968	2.35432	2.06475	0.0718288	2	N/A	N/A	1.35987
712	TEN2	0.436	0.944136	2.34312	1.78384	-0.221241	2	N/A	N/A	0.546594
713	TEN2	0.168	1.33171	2.33964	0.765271	-0.152985	2	N/A	N/A	0.398196
714	TEN2	0.235	0.867411	2.32732	2.08708	-0.0899911	2	N/A	N/A	0.193433
715	TEN2	0.189	2.24608	2.32307	-3.1858	-0.295972	1	N/A	N/A	0.692666
716	TEN2	0.087	0.194549	2.32257	4.52581	-0.104827	2	N/A	N/A	0.549252
717	TEN2	0.145	1.45919	2.32226	0.492933	-0.37268	2	N/A	N/A	0.95769
718	TEN2	0.124	0.858223	2.31766	2.19618	-0.100791	2	N/A	N/A	0.380559
719	TEN2	0.141	0.923698	2.27753	2.02782	-0.0835579	2	N/A	N/A	0.748733
720	TEN2	0.172	1.57277	2.27336	0.40534	-0.484476	2	N/A	N/A	0.547005
721	TEN2	0.152	0.962156	2.24952	1.87065	-0.17381	2	N/A	N/A	0.360796
722	TEN2	0.382	0.526505	2.24247	3.99754	-0.89519	2	N/A	N/A	0.7438
723	TEN2	0.069	1.23837	2.23245	1.10234	-0.30883	2	N/A	N/A	0.805925
724	TEN2	0.031	0.718404	2.21869	2.92179	-1.1264	2	N/A	N/A	0.68075
725	TEN2	0.102	1.62275	2.2085	0.304657	-0.678105	2	N/A	N/A	0.553454
726	TEN2	0.077	1.17001	2.20561	1.22718	-0.340645	2	N/A	N/A	0.438773
727	TEN2	0.345	1.14389	2.20255	1.59352	-0.358998	2	N/A	N/A	0.438556
728	TEN2	0.056	4.62955	2.19918	-6.28722	1.38195	1	N/A	N/A	0.477472
729	TEN2	0.33	1.41795	2.17962	0.563892	-0.467773	2	N/A	N/A	0.648347
730	TEN2	0.201	2.82909	2.17547	-4.59351	-0.1373	1	N/A	N/A	0.346747
731	TEN2	0.164	2.23196	2.15224	-3.27501	-0.779833	1	N/A	N/A	1.33917
732	TEN2	0.135	1.14275	2.14118	1.40485	-0.459054	2	N/A	N/A	0.227643
733	TEN2	0.428	1.09741	2.12502	1.63969	-0.457179	2	N/A	N/A	0.738616
734	TEN2	0.166	0.468823	2.12372	4.0852	-1.32024	2	N/A	N/A	0.60061
735	TEN2	0.239	3.05799	2.1123	-4.88411	-0.0417298	1	N/A	N/A	0.61963
736	TEN2	0.114	3.05654	2.10675	-4.90628	-0.043081	1	N/A	N/A	1.14841
737	TEN2	0.147	1.27373	2.08703	0.709628	-1.40894	2	N/A	N/A	0.766159
738	TEN2	0.193	3.54014	2.08458	-5.44268	0.631306	1	N/A	N/A	0.567515
739	TEN2	0.093	2.86327	2.08008	-4.74303	-0.224762	1	N/A	N/A	0.256024
740	TEN2	0.048	1.02678	2.06168	0.84452	-1.85266	2	N/A	N/A	0.962976
741	TEN2	0.614	1.88636	2.05712	-2.32661	-1.7072	1	N/A	N/A	1.1002
742	TEN2	0.405	0.84435	2.04951	2.75931	-2.03587	2	N/A	N/A	0.742902
743	TEN2	0.095	1.42562	2.03688	0.211375	-1.40205	2	N/A	N/A	0.562833
744	TEN2	0.237	0.878808	2.03082	2.67515	-1.99882	2	N/A	N/A	0.207727
745	TEN2	0.079	1.19869	2.02928	0.669295	-1.69525	2	N/A	N/A	0.355319
746	TEN2	0.091	1.12792	2.00636	0.731713	-1.77022	2	N/A	N/A	0.29726
747	TEN2	0.185	2.28354	1.99933	-3.44402	-1.05185	1	N/A	N/A	0.413348
748	TEN2	0.286	0.823893	1.99848	2.76706	-2.07464	2	N/A	N/A	0.399737
749	TEN2	0.187	1.55842	1.97865	-0.191754	-1.81266	2	N/A	N/A	0.490661
750	TEN2	0.079	0.559439	1.95534	3.81876	-2.12131	2	N/A	N/A	0.508669
751	TEN2	0.093	0.879283	1.94884	2.54947	-2.30711	2	N/A	N/A	0.0895426
752	TEN2	0.152	0.427216	1.94669	4.05878	-2.20592	2	N/A	N/A	0.0895426
753	TEN2	0.031	2.85532	1.93467	-4.7551	-0.7214	1	N/A	N/A	0.588963
754	TEN2	0.203	0.86333	1.92645	2.68276	-2.21812	2	N/A	N/A	0.464916
755	TEN2	0.089	0.253004	1.9125	4.52086	-1.9024	2	N/A	N/A	0.254652
756	TEN2	0.089	1.0109	1.91014	0.947358	-2.06004	2	N/A	N/A	1.31723
757	TEN2	0.069	0.70762	1.88841	2.72948	-2.45536	2	N/A	N/A	0.354663
758	TEN2	0.035	2.61944	1.88475	-4.59787	-1.15253	1	N/A	N/A	0.288827
759	TEN2	0.116	2.19353	1.88313	-3.37597	-1.39014	1	N/A	N/A	0.527857
760	TEN2	0.193	1.36307	1.86012	-0.133732	-2.16329	2	N/A	N/A	0.360633
761	TEN2	0.083	0.908571	1.85826	2.39508	-2.47389	2	N/A	N/A	0.439022
762	TEN2	0.288	1.8865	1.84277	-2.64488	-2.07841	1	N/A	N/A	1.58524
763	TEN2	0.357	2.05447	1.83252	-2.87915	-2.10944	1	N/A	N/A	0.411889
764	TEN2	0.187	0.562679	1.80733	3.54609	-2.98404	2	N/A	N/A	0.55671
765	TEN2	0.421	0.564364	1.80481	3.49415	-2.98245	2	N/A	N/A	0.227675
766	TEN2	0.156	0.792873	1.78722	2.55764	-2.602	2	N/A	N/A	0.299926
767	TEN2	0.125	1.36795	1.76463	-0.234049	-2.39055	2	N/A	N/A	0.272324
768	TEN2	0.135	1.46011	1.75336	-0.269181	-2.3724	2	N/A	N/A	0.261929
769	TEN2	0.303	2.21643	1.75098	-3.36953	-2.20425	1	N/A	N/A	0.484337
770	TEN2	0.241	0.585034	1.75004	3.48596	-3.07902	2	N/A	N/A	0.583752
771	TEN2	0.095	2.86849	1.74557	-5.0399	-1.16487	1	N/A	N/A	0.495521
772	TEN2	0.193	4.90345	1.72765	-6.46287	1.44391	1	N/A	N/A	0.913169
773	TEN2	0.158	0.641785	1.70438	3.42281	-3.16435	2	N/A	N/A	1.03164
774	TEN2	0.044	0.466993	1.70108	4.1073	-3.40366	2	N/A	N/A	1.49614
775	TEN2	0.286	1.33555	1.6912	-0.248305	-2.60218	2	N/A	N/A	0.39916
776	TEN2	0.34	1.90072	1.68981	-2.73867	-2.27746	1	N/A	N/A	0.685088
777	TEN2	0.041	0.99822	1.67378	1.10704	-3.6851	2	N/A	N/A	0.61245
778	TEN2	0.137	1.21449	1.66406	-0.0237935	-3.18685	2	N/A	N/A	0.793492
779	TEN2	0.237	2.94338	1.62479	-5.44161	-1.1493	1	N/A	N/A	1.03855
780	TEN2	0.064	0.935593	1.62252	1.09389	-3.7115	2	N/A	N/A	0.888505
781	TEN2	0.459	0.883237	1.62045	0.56465	-3.03779	2	N/A	N/A	0.326695
782	TEN2	0.133	4.23507	1.61007	-6.24052	1.00017	1	N/A	N/A	0.438305
783	TEN2	0.062	0.51472	1.57334	3.74961	-4.50626	2	N/A	N/A	0.441068
784	TEN2	0.095	0.935618	1.56287	1.09612	-3.74298	2	N/A	N/A	0.836701
785	TEN2	0.249	0.361813	1.55688	4.16763	-4.56816	2	N/A	N/A	0.92955
786	TEN2	0.141	2.7532	1.55599	-5.183	-1.44141	1	N/A	N/A	0.983546
787	TEN2	0.096	4.97011	1.55303	-6.46281	1.43507	1	N/A	N/A	0.59967
788	TEN2	0.152	1.33957	1.55276	-0.144013	-3.40294	2	N/A	N/A	0.772502
789	TEN2	0.042	0.478985	1.54586	3.84236	-4.59361	2	N/A	N/A	1.03405
790	TEN2	0.203	0.656894	1.54567	3.41418	-4.58148	2	N/A	N/A	0.729361
791	TEN2	0.189	1.12139	1.53431	0.430928	-3.62539	2	N/A	N/A	0.804206
792	TEN2	0.039	0.233601	1.53407	4.37026	-4.85426	2	N/A	N/A	0.881711
793	TEN2	0.141	2.21674	1.52593	-3.63497	-2.73562	1	N/A	N/A	0.880706
794	TEN2	0.05	0.31117	1.52458	4.3029	-4.85599	2	N/A	N/A	0.489777
795	TEN2	0.091	0.435431	1.51772	3.93863	-4.78906	2	N/A	N/A	0.17069
796	TEN2	0.073	0.946624	1.50116	1.02172	-3.84523	2	N/A	N/A	0.780455
797	TEN2	0.206	0.576937	1.49659	3.45453	-4.76478	2	N/A	N/A	0.594529
798	TEN2	0.208	1.03594	1.49272	0.654781	-3.69539	2	N/A	N/A	0.504561
799	TEN2	0.149	2.26064	1.48165	-3.70619	-2.79642	1	N/A	N/A	0.743316
800	TEN2	0.145	0.258309	1.47038	4.35505	-4.95239	2	N/A	N/A	0.234575
801	TEN2	0.152	2.13853	1.45895	-3.44861	-2.98344	1	N/A	N/A	0.728897
802	TEN2	0.112	3.18538	1.44239	-5.90816	-1.32316	1	N/A	N/A	1.00785
803	TEN2	0.235	1.09541	1.43271	0.495271	-3.68908	2	N/A	N/A	0.862565
804	TEN2	0.235	1.09541	1.43271	0.472218	-3.68803	2	N/A	N/A	0.469979
805	TEN2	0.185	0.919274	1.41796	0.980454	-3.86488	2	N/A	N/A	0.317378
806	TEN2	0.199	1.79839	1.40127	-2.43006	-3.64012	1	N/A	N/A	0.87674
807	TEN2	0.152	1.85373	1.39215	-2.57251	-3.51066	1	N/A	N/A	0.790324
808	TEN2	0.446	1.0179	1.37937	0.535536	-3.61258	2	N/A	N/A	0.482889
809	TEN2	0.147	0.701941	1.37846	3.24472	-5.0531	2	N/A	N/A	0.446843
810	TEN2	0.164	0.720966	1.37564	3.21368	-5.05915	2	N/A	N/A	0.383392
811	TEN2	0.081	0.570827	1.36963	3.78918	-5.13978	2	N/A	N/A	1.21383
812	TEN2	0.118	0.294445	1.36894	4.27022	-5.25544	2	N/A	N/A	0.352979
813	TEN2	0.185	5.42556	1.36375	-6.53322	1.5124	1	N/A	N/A	0.722054
814	TEN2	0.152	1.59148	1.35296	-1.40628	-3.9958	2	N/A	N/A	0.359832
815	TEN2	0.299	1.46911	1.34816	-1.02168	-3.99999	2	N/A	N/A	0.360103
816	TEN2	0.066	0.273236	1.34619	4.25402	-5.25325	2	N/A	N/A	0.167899
817	TEN2	0.048	1.27806	1.32103	-0.30032	-4.00736	2	N/A	N/A	1.11319
818	TEN2	0.002	4.57094	1.31819	-6.36691	1.24282	1	N/A	N/A	0.431651
819	TEN2	0.052	0.0167632	1.30772	4.30628	-6.05485	2	N/A	N/A	0.943943
820	TEN2	0.137	0.460665	1.2977	3.88526	-5.36792	2	N/A	N/A	2.04668
821	TEN2	0.039	0.823216	1.26182	2.75578	-5.44382	2	N/A	N/A	0.434176
822	TEN2	0.058	3.69819	1.24465	-6.32316	-1.23491	1	N/A	N/A	1.34764
823	TEN2	0.071	0.752758	1.22211	2.81012	-5.54475	2	N/A	N/A	1.0814
824	TEN2	0.058	5.2811	1.21666	-6.50325	1.47269	1	N/A	N/A	0.837946
825	TEN2	0.216	1.38795	1.18389	-0.91554	-4.60589	2	N/A	N/A	0.699854
826	TEN2	0.062	0.390812	1.14837	3.81214	-5.85956	2	N/A	N/A	0.245592
827	TEN2	0.139	0.584591	1.13395	2.93298	-6.06759	2	N/A	N/A	0.278997
828	TEN2	0.042	1.61042	1.11707	-1.58966	-4.63884	2	N/A	N/A	0.160175
829	TEN2	0.041	0.675848	1.0961	2.84121	-6.0781	2	N/A	N/A	1.46668
830	TEN2	0.145	0.565071	1.07313	2.93623	-6.15781	2	N/A	N/A	0.738679
831	TEN2	0.095	1.34523	1.06943	-0.8904	-4.79988	2	N/A	N/A	0.52878
832	TEN2	0.019	0.393098	1.06472	3.78057	-6.14268	2	N/A	N/A	0.532903
833	TEN2	0.106	1.56596	1.04163	-1.5574	-4.79195	2	N/A	N/A	1.38617
834	TEN2	0.052	1.71644	0.966935	-1.95291	-5.05244	2	N/A	N/A	1.16337
835	TEN2	0.052	1.71644	0.966935	-1.97535	-5.00316	2	N/A	N/A	0.742897
836	TEN2	0.288	1.6164	0.957738	-1.6796	-4.89241	2	N/A	N/A	0.330614
837	TEN2	0.116	0.396015	0.906536	3.8326	-6.77433	2	N/A	N/A	2.13376
838	TEN2	0.029	1.37903	0.890976	-0.841327	-4.95934	2	N/A	N/A	1.85681
839	TEN2	0.187	0.926665	0.831455	2.43568	-6.56122	2	N/A	N/A	0.576761
840	TEN2	0.112	0.264857	0.79337	3.90156	-6.85723	2	N/A	N/A	0.992215
841	TEN2	0.029	0.275073	0.718348	3.84263	-6.87682	2	N/A	N/A	0.431821
842	TEN2	0.062	0.175661	0.171467	3.76176	-6.9809	2	N/A	N/A	0.823869
843	TEN2	0.093	1.80305	1.86812	-2.43406	-1.97213	1	N/A	N/A	0.337011
844	TEN2	0.064	3.19769	0.965871	-6.3779	-1.70941	1	N/A	N/A	0.900262
845	TEN2	0.002	2.38571	0.431982	-5.68952	-3.18886	1	N/A	N/A	0.546207
846	TEN2	0.066	0.90279	1.53605	1.08402	-3.7596	2	N/A	N/A	0.769837
847	TEN2	0.102	0.444126	1.44939	3.89844	-4.87927	2	N/A	N/A	0.673825
848	TEN2	0.129	0.792939	1.16948	2.71975	-5.6429	2	N/A	N/A	0.59823
849	TEN2	0.095	1.90497	1.5373	-2.72333	-3.01423	1	N/A	N/A	0.705328
850	TEN2	0.079	2.81128	1.75226	-4.93666	-1.23803	1	N/A	N/A	0.403731
851	TEN2	0.118	1.02724	2.51327	1.31546	0.322725	2	N/A	N/A	0.856194
852	TEN2	0.494	2.04048	3.27171	-2.87299	1.71162	1	N/A	N/A	0.561151
853	TEN2	0.189	0.980345	2.46408	1.74577	0.193471	2	N/A	N/A	0.451064
854	TEN2	0.239	2.8761	1.44434	-5.5429	-1.48149	1	N/A	N/A	0.382728
855	TEN2	0.075	2.86645	2.08409	-4.67048	-0.256395	1	N/A	N/A	0.688278
856	TEN2	0.127	2.18647	1.44629	-3.70778	-2.93527	1	N/A	N/A	0.599113
857	TEN2	0.201	1.13902	3.23364	1.33918	3.65526	3	N/A	N/A	1.00088
858	TEN2	0.108	2.94521	0.60364	-5.9496	-2.70635	1	N/A	N/A	0.441606
859	TEN2	0.214	0.704819	2.13732	2.93162	-1.49179	2	N/A	N/A	0.318788
860	TEN2	0.112	5.149	2.0596	-6.49421	1.50093	1	N/A	N/A	0.316949
861	TEN2	0.162	2.80667	2.1223	-4.52445	-0.181802	1	N/A	N/A	1.1751
862	TEN2	0.164	0.923246	3.90301	1.53255	5.88565	3	N/A	N/A	1.31173
863	TEN2	0.05	2.32586	1.50191	-3.72932	-2.78046	1	N/A	N/A	0.366834
864	TEN2	0.135	2.18127	1.69318	-3.32179	-2.32029	1	N/A	N/A	0.268016
865	TEN2	0.154	3.60295	1.4127	-6.21373	-1.10043	1	N/A	N/A	1.4238
866	TEN2	0.056	1.23011	1.25424	-0.323914	-4.06084	2	N/A	N/A	1.1663
867	TEN2	0.125	3.31478	1.29068	-6.23355	-1.38006	1	N/A	N/A	0.27501
868	TEN2	0.363	1.78138	3.01378	-2.21167	1.6805	1	N/A	N/A	0.737718
869	TEN2	0.133	0.486806	2.79941	3.59276	1.70676	2	N/A	N/A	0.82694
870	TEN2	0.203	2.21162	1.76511	-3.34088	-2.17457	1	N/A	N/A	0.46386
871	TEN2	0.039	2.41047	2.52644	-3.33784	0.112329	1	N/A	N/A	0.325737
872	TEN2	0.044	5.04684	4.67228	-4.25961	2.20361	1	N/A	N/A	0.592389
873	TEN2	0.077	0.38498	1.91576	4.2181	-2.22409	2	N/A	N/A	0.488023
874	TEN2	0.174	0.775838	1.01109	2.67537	-6.21555	2	N/A	N/A	1.35727
875	TEN2	0.114	2.78828	1.62059	-5.17798	-1.43511	1	N/A	N/A	0.29718
876	TEN2	0.039	4.46621	1.82671	-6.22928	1.13068	1	N/A	N/A	0.715409
877	TEN2	0.083	0.543421	0.767407	3.71877	-6.85945	2	N/A	N/A	1.28191
878	TEN2	0.079	1.75434	4.75288	-3.3878	3.65364	1	N/A	N/A	1.00894
879	TEN2	0.112	0.366706	2.15656	4.2715	-1.1494	2	N/A	N/A	1.07662
880	TEN2	0.181	3.49123	1.55597	-6.0082	-0.979963	1	N/A	N/A	0.561281
881	TEN2	0.131	3.561	2.03329	-5.47869	0.611599	1	N/A	N/A	0.284357
882	TEN2	0.178	1.88708	1.71744	-2.65983	-2.34066	1	N/A	N/A	0.284357
883	TEN2	0.17	2.22109	1.26268	-3.70288	-3.20356	1	N/A	N/A	0.348932
884	TEN2	0.044	3.27013	3.02557	-4.33796	1.32691	1	N/A	N/A	0.535698
885	TEN2	0.1	2.40587	0.870359	-5.61643	-3.2188	1	N/A	N/A	0.190274
886	TEN2	0.11	1.20747	2.4249	0.965832	0.142587	2	N/A	N/A	0.790583
887	TEN2	0.046	0.829212	1.27937	2.75463	-5.45784	2	N/A	N/A	0.871144
888	TEN2	0.214	0.593473	1.75774	3.44808	-3.076	2	N/A	N/A	0.5691
889	TEN2	0.041	2.29408	2.97326	-3.07883	1.21857	1	N/A	N/A	0.840722
890	TEN2	0.162	2.68996	5.58027	-3.73995	3.27194	1	N/A	N/A	0.309414
891	TEN2	0.303	0.737283	1.3168	3.209	-5.07953	2	N/A	N/A	0.492602
892	TEN2	0.222	1.14709	3.57911	1.14288	4.88639	3	N/A	N/A	0.434732
893	TEN2	0.247	1.23551	0.880609	-0.717634	-5.18445	2	N/A	N/A	0.31091
894	TEN2	0.239	1.20438	1.49114	0.0952113	-3.55163	2	N/A	N/A	1.88821
895	TEN2	0.046	0.100817	1.99568	4.60922	-1.63821	2	N/A	N/A	0.174398
896	TEN2	0.114	0.435187	9.78105	0.188982	9.24873	3	N/A	N/A	0.5726
897	TEN2	0.11	0.470805	2.65784	3.66507	1.39404	2	N/A	N/A	0.919765
898	TEN2	0.183	1.31381	3.22709	1.15935	3.70677	3	N/A	N/A	0.680922
899	TEN2	0.069	2.72732	2.25129	-4.50588	-0.203489	1	N/A	N/A	0.596871
900	TEN2	0.079	1.05165	2.36697	1.39837	0.203587	2	N/A	N/A	0.822476
901	TEN2	0.112	1.0497	2.17933	1.59405	-0.360504	2	N/A	N/A	0.507347
902	TEN2	0.104	1.06115	2.91115	1.75996	2.96243	3	N/A	N/A	0.12641
903	TEN2	0.208	0.645118	1.94437	3.29906	-2.34171	2	N/A	N/A	0.433936
904	TEN2	0.141	1.29391	1.42432	-0.164398	-3.70274	2	N/A	N/A	0.753588
905	TEN2	0.149	0.437631	3.27205	3.2094	3.93045	3	N/A	N/A	0.532984
906	TEN2	0.108	0.438667	2.57874	3.66906	1.24764	2	N/A	N/A	0.576092
907	TEN2	0.05	0.158647	2.93792	3.99664	2.23376	2	N/A	N/A	0.237419
908	TEN2	0.145	0.250416	3.61798	3.18002	4.83344	3	N/A	N/A	0.754467
909	TEN2	0.139	0.215172	5.69981	0.171819	9.32028	3	N/A	N/A	1.666
910	TEN2	0.031	0.0261288	4.96688	1.43147	9.05788	3	N/A	N/A	0.306301
911	TEN2	0.201	1.02701	2.13068	1.61555	-0.374208	2	N/A	N/A	0.269459
912	TEN2	0.044	1.08832	5.3918	0.356426	8.75504	3	N/A	N/A	0.286324
913	TEN2	0.154	1.25246	1.98072	0.516869	-1.71294	2	N/A	N/A	0.856808
914	TEN2	0.096	0.445429	1.22934	3.80549	-5.57226	2	N/A	N/A	0.941245
915	TEN2	0.095	0.781733	2.98452	2.27979	2.86797	3	N/A	N/A	1.22571
916	TEN2	0.108	0.333297	2.41683	4.37988	0.0857351	2	N/A	N/A	0.504516
917	TEN2	0.162	0.904566	1.22139	2.67515	-5.55007	2	N/A	N/A	0.86391
918	TEN2	0.143	0.487913	4.1576	2.27328	7.24164	3	N/A	N/A	1.08802
919	TEN2	0.073	0.399057	3.05609	3.74324	2.57841	2	N/A	N/A	1.16425
920	TEN2	0.154	1.92358	1.5241	-2.75211	-3.05959	1	N/A	N/A	1.629
921	TEN2	0.124	0.666357	2.23846	2.97249	-1.17497	2	N/A	N/A	0.412384
922	TEN2	0.096	0.0518215	3.24251	3.79159	3.89991	3	N/A	N/A	0.138006
923	TEN2	0.037	0.30251	0.416967	3.79499	-6.95652	2	N/A	N/A	0.956276
924	TEN2	0.081	1.35735	3.64386	0.963397	4.66205	3	N/A	N/A	0.707094
925	TEN2	0.05	1.82805	2.47753	-2.67723	0.157363	1	N/A	N/A	1.10009
926	TEN2	0.066	0.493311	2.33721	4.05707	-0.203598	2	N/A	N/A	1.10009
927	TEN2	0.031	0.599675	4.23964	1.95373	7.60158	3	N/A	N/A	1.53707
928	TEN2	0.066	0.202371	2.02921	4.53432	-1.67215	2	N/A	N/A	0.486414
929	TEN2	0.052	0.0855554	2.24908	4.58161	-0.231293	2	N/A	N/A	1.24015
930	TEN2	0.095	0.829848	2.42043	2.38996	0.117052	2	N/A	N/A	0.549854
931	TEN2	0.234	1.69145	2.89974	-2.01007	1.51728	1	N/A	N/A	0.489084
932	TEN2	0.068	0.250617	4.1746	2.7254	7.36453	3	N/A	N/A	0.567609
933	TEN2	0.239	0.572955	1.41537	3.45025	-4.90365	2	N/A	N/A	0.433294
934	TEN2	0.066	0.468708	1.3565	3.83576	-5.2025	2	N/A	N/A	0.148859
935	TEN2	0.156	0.797343	2.03848	2.83594	-2.00804	2	N/A	N/A	0.683855
936	TEN2	0.033	0.417644	1.9083	4.15432	-2.37005	2	N/A	N/A	0.183183
937	TEN2	0.085	0.96868	1.79236	2.08848	-2.62925	2	N/A	N/A	0.911943
938	TEN2	0.066	0.182757	3.99552	2.92936	7.24982	3	N/A	N/A	1.36584
939	TEN2	0.052	0.389592	2.34786	4.2285	-0.162809	2	N/A	N/A	0.262864
940	TEN2	0.052	0.389592	2.34786	4.16228	-0.19813	2	N/A	N/A	0.326304
