# Supplementary material for: Interaction between Teneurin-2 and microtubules via EB proteins provides a platform for GABAA receptor exocytosis
Source: eLife journal article supplement (doi:10.7554/elife.83276), 2023-06-05
Supplement: fig2-data1 [file 2D-F.xlsx]

## Sheet: Sheet1
Comparison between clusters for each parameter.
area (µm2)	MAP2 (AU)	actin (AU)	cluster		area
0.035	6.2288	2.1628	1			One-way ANOVA
0.378	5.07691	1.11132	1					Df	Sum Sq	Mean Sq	F value	Pr(>F)
0.112	4.81009	1.66934	1				cluster	2	0.195	0.09751	6.329	0.00186	**
0.052	4.57487	2.5136	1				Residuals	937	14.436	0.01541
0.208	4.20808	2.71378	1			Tukey HSD
0.114	3.97005	1.7399	1					diff	lwr	upr	p adj
0.058	3.8648	1.26559	1				cluster2-1	-0.0322406	-0.0540372	-0.0104439	0.0015639
0.037	3.77793	2.35037	1				cluster3-1	-0.0258052	-0.0516895	7.90684e-05	0.0509099
0.037	3.77793	2.35037	1				cluster3-2	0.00643534	-0.0181826	0.0310533	0.812698
0.071	3.67677	1.72037	1
0.272	3.56655	0.848215	1		MAP2
0.259	3.48228	4.09096	1			One-way ANOVA
0.064	3.47267	1.21606	1					Df	Sum Sq	Mean Sq	F value	Pr(>F)
0.052	3.35165	2.89963	1				cluster	2	725.9	362.9	941.3	<2e-16	***
0.276	3.30401	1.19504	1				Residuals	937	361.3	0.4
0.114	3.25331	1.61394	1			Tukey HSD
0.075	3.25002	1.64876	1					diff	lwr	upr	p adj
0.232	3.24375	1.74604	1				cluster2-1	-1.80708	-1.91612	-1.69805	0
0.056	3.24269	3.31177	1				cluster3-1	-1.95616	-2.08565	-1.82667	0
0.071	3.15885	1.90933	1				cluster3-2	-0.149076	-0.272229	-0.0259231	0.0127312
0.255	3.13004	1.51986	1
0.048	3.12821	1.35436	1		actin
0.151	3.05829	1.70689	1			One-way ANOVA
0.168	3.02533	1.68831	1					Df	Sum Sq	Mean Sq	F value	Pr(>F)
0.154	3.01737	1.40081	1				cluster	2	682.4	341.2	492.1	<2e-16	***
0.137	2.99982	1.4499	1				Residuals	937	649.7	0.7
0.054	2.98953	0.617682	1			Tukey HSD
0.118	2.94156	1.44929	1					diff	lwr	upr	p adj
0.079	2.8788	3.80051	1				cluster2-1	-0.472464	-0.618688	-0.32624	0
0.166	2.82883	4.73282	1				cluster3-1	1.71012	1.53648	1.88377	0
0.214	2.81648	2.15512	1				cluster3-2	2.18259	2.01744	2.34774	0
0.309	2.72322	1.65567	1
0.403	2.71415	1.88887	1
0.048	2.71237	1.93752	1
0.264	2.6803	4.30818	1
0.098	2.65436	4.7857	1
0.235	2.57723	1.9656	1
0.056	2.57235	2.89808	1
0.309	2.56464	2.34998	1
0.181	2.48098	2.78775	1
0.565	2.4804	1.45167	1
0.741	2.45672	1.86591	1
0.243	2.45427	1.54778	1
0.141	2.43804	2.07743	1
0.577	2.41751	2.28529	1
0.272	2.39569	1.40505	1
0.243	2.34372	1.64598	1
0.185	2.32561	3.49585	1
0.531	2.31374	2.2443	1
0.064	2.30216	0.602737	1
0.131	2.2945	0.950642	1
0.78	2.28806	1.27872	1
0.166	2.28554	1.64973	1
0.282	2.28446	2.1217	1
0.183	2.28278	1.43492	1
0.124	2.2129	4.3694	1
0.023	2.17626	2.21737	1
0.602	2.17266	1.29715	1
0.042	2.16931	1.29808	1
0.33	2.16678	2.52912	1
0.075	2.15653	2.84252	1
0.137	2.1441	0.921391	1
0.093	2.14051	0.823751	1
0.178	2.13141	4.42217	1
0.178	2.12639	1.30809	1
0.181	2.09859	1.61734	1
0.239	2.09766	2.68702	1
0.108	2.09531	2.43963	1
0.253	2.09469	1.60158	1
0.347	2.05506	1.78774	1
0.21	2.0411	0.805904	1
0.23	2.03567	2.27058	1
0.06	2.03202	1.26832	1
0.309	2.02654	2.54192	1
0.197	2.02254	1.2684	1
0.108	2.02187	1.43243	1
0.174	2.01298	2.32602	1
0.124	2.00711	2.01904	1
0.573	1.9945	2.01562	1
0.206	1.99447	1.70524	1
0.344	1.98438	1.62614	1
0.085	1.97719	3.27671	1
0.743	1.9543	2.28916	1
0.129	1.94291	1.1435	1
0.262	1.92081	1.67744	1
0.299	1.91262	1.37906	1
0.218	1.90948	2.50417	1
0.426	1.87774	1.58978	1
0.137	1.87646	1.49087	1
0.156	1.87215	3.30692	1
0.309	1.86089	3.70688	1
0.16	1.85862	1.98714	1
0.212	1.84216	1.3314	1
0.264	1.83521	1.39711	1
0.023	1.82652	1.57818	1
0.166	1.8149	1.29251	1
0.166	1.80696	1.09182	2
0.127	1.80596	4.29051	1
0.081	1.78174	3.00435	1
0.208	1.78086	2.73761	1
0.419	1.74214	1.90325	1
0.183	1.7211	3.03448	1
0.042	1.70356	1.886	1
0.002	1.67084	4.24609	1
0.369	1.64645	2.78161	1
0.16	1.64246	1.02635	2
0.048	1.62479	7.26771	3
0.179	1.6128	0.976883	2
0.247	1.61254	1.4388	2
0.448	1.6103	1.97636	2
0.33	1.60553	2.28256	2
0.461	1.59617	1.52809	2
0.282	1.59579	1.16414	2
0.531	1.56111	2.96672	1
0.197	1.53094	2.25378	2
0.322	1.53048	3.8113	1
0.28	1.51479	1.17669	2
0.21	1.50176	2.71902	1
0.046	1.50032	2.7537	1
0.095	1.49353	1.592	2
0.181	1.49263	0.995316	2
0.313	1.49237	2.27336	2
0.411	1.47301	1.62334	2
0.22	1.42475	0.976079	2
0.232	1.42175	1.77559	2
0.06	1.40318	5.64728	3
0.195	1.37029	2.99034	3
0.183	1.36711	1.20242	2
0.282	1.33232	1.72305	2
0.06	1.33122	1.34811	2
0.122	1.31498	2.26108	2
0.755	1.31482	1.62286	2
0.062	1.31088	2.47623	2
0.253	1.29709	0.777891	2
0.199	1.29435	2.54705	2
0.079	1.29399	1.62313	2
0.183	1.29357	2.30043	2
0.052	1.29155	2.84237	3
0.54	1.27325	2.49957	2
0.272	1.25878	1.82355	2
0.388	1.25539	2.69033	2
0.423	1.24668	4.4327	3
0.069	1.24586	1.03045	2
0.313	1.24417	2.44332	2
0.234	1.23911	2.92373	3
0.303	1.23731	1.44628	2
0.326	1.22324	2.21706	2
0.199	1.21661	1.89946	2
0.093	1.21497	2.37346	2
0.143	1.20471	3.7195	3
0.185	1.20459	1.86569	2
0.303	1.2031	2.76964	2
0.166	1.16718	3.97585	3
0.363	1.16495	2.50603	2
0.095	1.15026	2.47735	2
0.141	1.14521	4.38709	3
0.131	1.13911	3.69046	3
0.122	1.12438	1.30482	2
0.164	1.12438	5.27011	3
0.166	1.11884	2.22317	2
0.237	1.10385	4.74823	3
0.17	1.09242	2.18073	2
0.139	1.0732	1.95201	2
0.125	1.07073	1.67467	2
0.091	1.0615	1.55207	2
0.6	1.05636	1.65487	2
0.392	1.04962	1.73621	2
0.079	1.04614	1.59701	2
0.172	1.03653	1.90936	2
0.268	1.02576	1.87033	2
0.183	0.992066	2.22901	2
0.05	0.984862	4.68381	3
0.199	0.978974	0.931093	2
0.156	0.974272	4.80814	3
0.457	0.96225	2.26432	2
0.235	0.960285	4.75182	3
0.104	0.951988	4.47664	3
0.361	0.949724	1.00947	2
0.266	0.936066	2.81122	3
0.1	0.912176	1.50436	2
0.085	0.906862	3.04689	3
0.12	0.906757	3.284	3
0.066	0.905665	1.29315	2
0.301	0.898892	1.97162	2
0.21	0.868157	1.19358	2
0.079	0.865921	0.640207	2
0.156	0.856927	1.6613	2
0.206	0.855583	0.821891	2
0.05	0.855019	1.30137	2
0.095	0.839088	3.56058	3
0.318	0.811348	3.73684	3
0.112	0.810971	4.35644	3
0.272	0.807405	3.55699	3
0.212	0.796437	3.03495	3
0.21	0.794262	3.76346	3
0.193	0.794005	0.689441	2
0.307	0.771977	3.75719	3
0.164	0.742496	2.14962	2
0.224	0.729339	1.96784	2
0.315	0.718945	2.5552	2
0.193	0.711711	3.014	3
0.019	0.692231	3.74797	3
0.044	0.689923	2.46713	2
0.158	0.672165	1.78239	2
0.083	0.666629	2.37878	2
0.261	0.662562	3.34097	3
0.438	0.653929	3.75582	3
0.064	0.626851	2.05335	2
0.452	0.626763	1.88117	2
0.149	0.604976	2.92393	3
0.232	0.599136	3.18451	3
0.093	0.588949	1.07191	2
0.257	0.585113	1.42175	2
0.154	0.584058	3.04525	3
0.122	0.577647	2.01582	2
0.195	0.561319	3.31398	3
0.156	0.548883	2.32384	2
0.079	0.548759	4.43362	3
0.046	0.536184	1.59891	2
0.152	0.52446	2.00007	2
0.031	0.521673	4.56494	3
0.077	0.512712	3.57189	3
0.166	0.490835	3.17914	3
0.201	0.489396	2.1369	2
0.062	0.478404	5.96803	3
0.137	0.465496	1.70164	2
0.272	0.460624	4.08126	3
0.129	0.458069	2.80959	2
0.253	0.453903	3.75413	3
0.06	0.45113	5.77895	3
0.048	0.440405	1.09196	2
0.044	0.440082	1.78119	2
0.081	0.43623	3.18781	3
0.199	0.417549	3.42611	3
0.305	0.412278	2.99136	2
0.002	0.390713	1.63601	2
0.286	0.388931	2.65249	2
0.133	0.380231	6.54061	3
0.041	0.379904	2.3473	2
0.178	0.371832	4.57608	3
0.085	0.35235	1.83123	2
0.046	0.349177	3.25804	3
0.041	0.341634	1.4845	2
0.195	0.325986	2.10996	2
0.033	0.325866	2.96007	2
0.017	0.325447	3.00686	2
0.1	0.325342	3.53926	3
0.139	0.318302	2.45725	2
0.276	0.312898	1.71838	2
0.127	0.310449	2.57299	2
0.052	0.302291	1.69202	2
0.116	0.302023	2.2431	2
0.278	0.295497	1.28237	2
0.206	0.291828	3.37124	3
0.135	0.281137	2.80222	2
0.187	0.27765	5.96749	3
0.494	0.277597	2.25615	2
0.131	0.268372	1.12023	2
0.185	0.26777	1.58867	2
0.216	0.266207	2.17353	2
0.293	0.249807	3.83137	3
0.563	0.228893	2.94959	2
0.199	0.216522	2.93062	2
0.151	0.213543	1.63356	2
0.079	0.212026	2.75606	2
0.1	0.207957	2.14958	2
0.172	0.206516	3.91623	3
0.133	0.1964	3.18528	3
0.133	0.192235	3.03352	2
0.054	0.186875	2.50872	2
0.081	0.173862	4.00693	3
0.251	0.171274	4.39333	3
0.147	0.165498	2.24484	2
0.118	0.164975	1.14882	2
0.197	0.161266	1.66623	2
0.189	0.160074	1.6644	2
0.023	0.149798	2.69242	2
0.095	0.145515	1.48781	2
0.064	0.137704	1.96526	2
0.218	0.128478	2.69965	2
0.068	0.121636	5.10579	3
0.096	0.120531	2.74441	2
0.206	0.0861957	3.31445	3
0.122	0.0812912	0.947759	2
0.206	0.0599952	3.46444	3
0.187	0.052534	2.02316	2
0.286	0.0496752	3.82325	3
0.141	0.0490992	1.75205	2
0.108	0.0489546	1.23435	2
0.261	0.0459386	2.50494	2
0.056	0.0338082	1.2398	2
0.125	0.0272654	1.32123	2
0.041	0.0213505	2.33804	2
0.152	5.86804	1.93206	1
0.168	5.46301	2.7545	1
0.044	5.37206	1.42031	1
0.093	4.75607	4.48264	1
0.199	4.6833	2.04722	1
0.087	4.64266	2.09732	1
0.077	4.46447	2.13509	1
0.056	4.16317	2.5159	1
0.156	4.02199	2.33067	1
0.284	3.98523	3.39293	1
0.096	3.90311	1.01706	1
0.166	3.84713	3.99697	1
0.164	3.82494	1.96308	1
0.095	3.60016	0.57294	1
0.106	3.41647	0.881439	1
0.16	3.40547	3.88296	1
0.131	3.36896	2.38351	1
0.042	3.26933	0.989264	1
0.199	3.25463	1.03084	1
0.137	3.23324	1.56436	1
0.334	3.23172	3.86861	1
0.243	3.19187	0.952435	1
0.324	3.17104	1.68849	1
0.195	3.13884	2.03792	1
0.359	3.09969	2.66461	1
0.102	3.08853	2.32482	1
0.108	3.05409	1.96344	1
0.28	3.04856	1.99259	1
0.316	3.03917	1.4787	1
0.288	2.95725	1.11488	1
0.193	2.89487	1.79355	1
0.075	2.84802	1.04294	1
0.035	2.81724	0.624419	1
0.178	2.8006	1.58356	1
0.166	2.77598	2.26584	1
0.064	2.75762	1.38174	1
0.042	2.74546	1.06661	1
0.133	2.74271	0.602152	1
0.108	2.70552	1.81445	1
0.116	2.69527	2.17985	1
0.16	2.69093	0.733434	1
0.054	2.67688	1.67738	1
0.174	2.66689	3.49661	1
0.052	2.64824	1.1916	1
0.066	2.63504	0.887094	1
0.095	2.62413	1.71939	1
0.463	2.61875	1.41395	1
0.154	2.61211	1.7113	1
0.12	2.55494	0.769753	1
0.197	2.54521	2.01293	1
0.179	2.5414	3.82267	1
0.068	2.54095	1.66951	1
0.438	2.53042	2.99	1
0.181	2.51842	2.53232	1
0.17	2.47603	2.30318	1
0.106	2.45593	1.18003	1
0.438	2.44074	3.02307	1
0.152	2.40589	0.793898	1
0.268	2.40547	1.65125	1
0.073	2.3495	1.91751	1
0.243	2.33517	2.60904	1
0.048	2.32454	0.693713	1
0.087	2.30965	2.0181	1
0.241	2.29987	1.18525	1
0.031	2.29723	1.42226	1
0.176	2.29496	2.60984	1
0.143	2.29455	1.58471	1
0.124	2.27709	2.38603	1
0.183	2.27493	4.09356	1
0.037	2.24155	0.97996	1
0.307	2.22586	2.96075	1
0.039	2.22003	4.14077	1
0.002	2.21808	4.32193	1
0.274	2.19999	4.19608	1
0.183	2.18794	0.766757	1
0.083	2.16708	1.21475	1
0.164	2.16022	4.07724	1
0.245	2.05357	1.22368	1
0.096	2.04534	3.49583	1
0.251	2.02683	1.87151	1
0.168	2.01467	1.42625	1
0.071	2.01052	2.0919	1
0.083	2.00239	2.30725	1
0.145	1.99571	1.70938	1
0.753	1.97644	3.50965	1
0.116	1.95019	1.42085	1
0.029	1.94772	2.13277	1
0.434	1.91759	2.16946	1
0.172	1.90819	2.10118	1
0.465	1.90381	1.46537	1
0.255	1.88511	2.44531	1
0.11	1.86469	1.85524	1
0.189	1.84609	3.09617	1
0.037	1.81339	0.911623	2
0.125	1.8123	0.870956	2
0.133	1.8092	3.60539	1
0.295	1.79751	1.99923	1
0.235	1.7952	0.49157	2
0.054	1.78464	3.22913	1
0.062	1.78311	0.668318	2
0.075	1.78151	0.965943	2
0.303	1.77961	1.68863	1
0.205	1.76862	1.17643	2
0.347	1.76293	1.25274	1
0.048	1.76105	2.57129	1
0.062	1.76079	1.66374	1
0.76	1.76025	3.94132	1
0.114	1.74831	1.65598	1
0.066	1.74139	0.762518	2
0.079	1.73763	1.25849	2
0.257	1.72463	1.23814	2
0.108	1.71749	0.864504	2
0.091	1.71545	4.17776	1
0.179	1.7114	1.09365	2
0.052	1.70416	1.21187	2
0.152	1.69478	1.07121	2
0.228	1.68032	3.6298	1
0.65	1.67021	1.75291	2
0.538	1.66123	3.76978	1
0.16	1.65528	0.725128	2
0.282	1.63362	0.943973	2
0.073	1.61381	1.301	2
0.212	1.59362	3.13941	1
0.05	1.56902	1.39695	2
0.162	1.56113	1.50912	2
0.187	1.54473	0.721601	2
0.201	1.53981	4.09324	1
0.087	1.53661	1.15307	2
0.45	1.51056	1.78501	2
0.137	1.48965	4.44227	1
0.129	1.48492	2.10599	2
0.205	1.47064	1.88923	2
0.041	1.46844	1.04639	2
0.158	1.46481	1.15646	2
0.201	1.44282	1.87565	2
0.174	1.43235	1.10674	2
0.174	1.43235	1.10674	2
0.1	1.42757	2.41876	2
0.145	1.40914	1.10185	2
0.565	1.40887	3.80687	1
0.056	1.38375	1.11037	2
0.284	1.37959	2.41288	2
0.311	1.3579	1.40649	2
0.093	1.35759	1.25553	2
0.151	1.33785	3.15493	3
0.154	1.33574	3.33271	3
0.384	1.2967	3.5148	3
0.239	1.28439	3.1537	3
0.147	1.2837	0.980551	2
0.149	1.2638	1.60945	2
0.066	1.26368	1.4678	2
0.262	1.2527	2.60683	2
0.147	1.2462	0.698867	2
0.062	1.21633	1.63725	2
0.087	1.21303	3.2302	3
0.179	1.21214	0.739977	2
0.295	1.20775	3.33338	3
0.135	1.2076	1.50479	2
0.041	1.20323	2.23738	2
0.112	1.20151	2.38326	2
0.156	1.17248	1.82768	2
0.056	1.14749	1.9763	2
0.151	1.13455	3.06489	3
0.035	1.13311	4.80678	3
0.044	1.125	2.01777	2
0.056	1.1202	0.621106	2
0.552	1.11618	3.05064	3
0.208	1.11112	1.93724	2
0.075	1.10505	4.70244	3
0.071	1.08968	1.98939	2
0.052	1.08804	1.95649	2
0.122	1.08026	3.49622	3
0.214	1.06934	3.13314	3
0.083	1.06183	3.5923	3
0.087	1.06087	1.39542	2
0.143	1.05458	3.54215	3
0.185	1.04425	1.97782	2
0.158	1.03683	3.83276	3
0.1	1.00996	4.28994	3
0.803	0.99136	2.87053	3
0.062	0.990289	2.70944	3
0.091	0.989054	3.78932	3
0.139	0.981038	2.23118	2
0.129	0.964395	1.48321	2
0.247	0.960636	3.84907	3
0.154	0.949501	3.02026	3
0.23	0.924315	3.70661	3
0.203	0.920169	0.625729	2
0.289	0.91122	3.35114	3
0.056	0.907099	3.76061	3
0.303	0.899185	4.73903	3
0.253	0.8986	2.92377	3
0.33	0.897261	3.59742	3
0.299	0.892145	2.8321	3
0.127	0.888354	3.6436	3
0.234	0.888204	1.00724	2
0.141	0.885066	3.89313	3
0.112	0.882959	3.65091	3
0.222	0.868214	4.81355	3
0.143	0.866242	4.38939	3
0.328	0.865123	3.65726	3
0.45	0.864269	3.28531	3
0.062	0.859438	0.319989	2
0.066	0.858469	2.72132	3
0.069	0.858333	3.12149	3
0.137	0.853248	1.79664	2
0.166	0.852732	3.37013	3
0.185	0.852592	3.95608	3
0.315	0.837675	3.31417	3
0.189	0.832907	0.981943	2
0.147	0.827257	1.91847	2
0.147	0.823228	0.792048	2
0.054	0.809397	0.671592	2
0.112	0.799716	3.2602	3
0.193	0.792034	2.9691	3
0.081	0.78245	1.83009	2
0.135	0.775581	4.06898	3
0.124	0.770111	2.24811	2
0.052	0.769283	1.95309	2
0.158	0.766267	2.05673	2
0.318	0.764945	4.10319	3
0.096	0.749536	2.18682	2
0.048	0.707224	0.513032	2
0.064	0.696029	0.9971	2
0.139	0.6876	1.56033	2
0.075	0.687109	3.31202	3
0.762	0.682157	3.66815	3
0.264	0.663612	3.46772	3
0.164	0.654616	2.70903	2
0.112	0.651568	1.18053	2
0.38	0.649464	3.94071	3
0.048	0.643848	3.33844	3
0.131	0.643004	4.05073	3
0.179	0.639029	1.10315	2
0.087	0.633905	3.15406	3
0.125	0.620229	3.74085	3
0.073	0.612625	2.92613	3
0.226	0.606294	1.0515	2
0.077	0.604669	3.14169	3
0.05	0.596349	4.44138	3
0.162	0.593707	1.59765	2
0.16	0.592605	3.6209	3
0.162	0.588011	0.989215	2
0.054	0.581536	2.61255	2
0.083	0.578836	4.31405	3
0.106	0.573056	3.62847	3
0.068	0.570947	3.37147	3
0.112	0.558908	1.54753	2
0.124	0.554765	2.31631	2
0.091	0.554399	3.25878	3
0.268	0.542266	2.65162	2
0.075	0.536961	2.01317	2
0.096	0.525353	2.56126	2
0.324	0.523444	4.46498	3
0.143	0.523103	3.97714	3
0.166	0.522879	4.34201	3
0.046	0.522253	2.44481	2
0.12	0.520644	3.10873	3
0.064	0.515303	3.28698	3
0.112	0.514584	3.21678	3
0.11	0.514337	3.36628	3
0.081	0.510564	3.73328	3
0.062	0.500964	2.00914	2
0.048	0.491144	1.87046	2
0.064	0.482915	1.55366	2
0.089	0.479711	1.32385	2
0.077	0.478732	2.7408	2
0.085	0.477729	4.35626	3
0.071	0.476725	1.50186	2
0.195	0.471993	4.55609	3
0.071	0.470673	1.83302	2
0.152	0.463968	3.39114	3
0.203	0.463369	1.4781	2
0.102	0.45593	3.26868	3
0.054	0.455854	0.541622	2
0.145	0.454495	3.46525	3
0.087	0.451635	3.98045	3
0.179	0.447237	2.34584	2
0.077	0.445533	2.66172	2
0.05	0.442805	2.23907	2
0.131	0.438305	1.71289	2
0.11	0.424849	1.78415	2
0.152	0.412714	2.85741	2
0.05	0.406791	4.31573	3
0.152	0.405681	4.74442	3
0.002	0.392233	4.83357	3
0.318	0.386251	4.14199	3
0.16	0.384788	4.7856	3
0.218	0.384155	3.34634	3
0.093	0.379403	4.04186	3
0.149	0.370683	1.9143	2
0.17	0.364348	3.06903	2
0.064	0.348587	0.35371	2
0.093	0.33992	4.76427	3
0.068	0.338212	4.32601	3
0.218	0.337841	2.10981	2
0.164	0.334033	0.843004	2
0.195	0.330588	4.4938	3
0.06	0.325381	0.67558	2
0.149	0.323625	2.78961	2
0.073	0.323611	3.33543	3
0.125	0.318764	0.935313	2
0.16	0.316821	4.74272	3
0.087	0.311066	1.26726	2
0.133	0.310799	3.31259	3
0.096	0.310446	1.65816	2
0.091	0.306164	0.603891	2
0.089	0.299481	1.6936	2
0.069	0.297353	3.74093	3
0.037	0.295062	0.805691	2
0.255	0.286455	2.00163	2
0.149	0.274135	4.0328	3
0.278	0.268659	4.05458	3
0.046	0.267917	1.97754	2
0.1	0.259813	1.46829	2
0.066	0.255809	4.83357	3
0.095	0.25113	3.95421	3
0.085	0.251088	2.43049	2
0.093	0.248738	2.32439	2
0.05	0.244047	4.80659	3
0.096	0.241434	1.39089	2
0.069	0.234717	1.85724	2
0.096	0.227995	2.03154	2
0.064	0.218075	1.85659	2
0.351	0.207792	2.67562	2
0.127	0.204592	1.72427	2
0.174	0.200512	3.15293	3
0.222	0.188179	0.645902	2
0.068	0.167867	3.97305	3
0.031	0.100598	0.906673	2
0.127	0.0986366	4.64368	3
0.158	0.0935984	4.20725	3
0.05	0.0822152	2.72645	2
0.154	0.0741493	1.26866	2
0.122	0.0593801	1.13349	2
0.147	0.0495523	2.77335	2
0.029	0.296258	6.58395	3
0.124	0.773169	6.1471	3
0.039	1.3433	6.11709	3
0.064	0.62868	6.07053	3
0.168	1.08351	5.98118	3
0.064	0.22336	5.11631	3
0.394	2.20425	5.04665	1
0.264	0.490058	5.02654	3
0.116	0.506381	4.96628	3
0.058	0.65264	4.8378	3
0.027	0.416361	4.79121	3
0.037	0.417446	4.66252	3
0.135	0.520583	4.59434	3
0.129	0.536848	4.52526	3
0.212	3.01503	4.43291	1
0.079	0.386045	4.38242	3
0.232	1.73529	4.30951	1
0.131	0.55487	4.30887	3
0.183	1.99026	4.18984	1
0.089	1.71501	4.16132	1
0.407	1.17859	4.15904	3
0.081	0.661204	4.12856	3
0.27	0.331399	3.96084	3
0.075	3.20963	3.91925	1
0.695	0.285216	3.89165	3
0.158	2.34036	3.81056	1
0.179	0.626469	3.8065	3
0.122	0.526072	3.7191	3
0.05	1.2223	3.6598	3
0.11	0.93111	3.65506	3
0.357	0.666769	3.6497	3
0.083	4.20508	3.60636	1
0.079	0.382183	3.60319	3
0.187	2.69272	3.56449	1
0.083	1.34015	3.56171	3
0.274	0.124187	3.55055	3
0.114	2.84745	3.5072	1
0.87	2.3995	3.47163	1
0.033	1.57619	3.38792	1
0.174	1.30138	3.38709	3
0.106	0.984062	3.32373	3
0.033	0.256359	3.30641	3
0.12	0.89605	3.30428	3
0.243	2.34785	3.30269	1
0.21	0.721723	3.28452	3
0.139	0.186698	3.27008	3
0.002	0.00849228	3.20835	3
0.276	1.09067	3.18857	3
0.133	1.77111	3.12737	1
0.259	2.16285	3.09469	1
0.398	2.94778	3.03685	1
0.093	0.696046	3.00632	3
0.066	1.92385	2.98427	1
0.178	2.50383	2.9769	1
0.179	1.93499	2.94558	1
0.417	2.11595	2.92853	1
0.066	0.348014	2.92351	2
0.228	2.79164	2.8739	1
0.11	0.774837	2.84686	3
0.143	0.828819	2.82069	3
0.345	0.443124	2.81909	2
0.247	1.60029	2.79778	1
0.444	0.588733	2.78084	2
0.091	4.10782	2.77442	1
0.054	2.89186	2.76674	1
0.212	1.98066	2.75002	1
0.133	3.51353	2.69682	1
0.046	1.20399	2.61067	2
0.234	0.765078	2.60085	2
0.232	3.17992	2.59158	1
0.268	1.91891	2.56176	1
0.203	0.768953	2.54876	2
0.125	1.23318	2.52497	2
0.125	3.41146	2.51674	1
0.216	0.720649	2.49779	2
0.091	0.812883	2.49037	2
0.104	1.09839	2.47434	2
0.129	2.12759	2.46203	1
0.108	0.179514	2.41995	2
0.156	0.52342	2.38454	2
0.129	1.28606	2.36108	2
0.197	0.886968	2.35432	2
0.436	0.944136	2.34312	2
0.168	1.33171	2.33964	2
0.235	0.867411	2.32732	2
0.189	2.24608	2.32307	1
0.087	0.194549	2.32257	2
0.145	1.45919	2.32226	2
0.124	0.858223	2.31766	2
0.141	0.923698	2.27753	2
0.172	1.57277	2.27336	2
0.152	0.962156	2.24952	2
0.382	0.526505	2.24247	2
0.069	1.23837	2.23245	2
0.031	0.718404	2.21869	2
0.102	1.62275	2.2085	2
0.077	1.17001	2.20561	2
0.345	1.14389	2.20255	2
0.056	4.62955	2.19918	1
0.33	1.41795	2.17962	2
0.201	2.82909	2.17547	1
0.164	2.23196	2.15224	1
0.135	1.14275	2.14118	2
0.428	1.09741	2.12502	2
0.166	0.468823	2.12372	2
0.239	3.05799	2.1123	1
0.114	3.05654	2.10675	1
0.147	1.27373	2.08703	2
0.193	3.54014	2.08458	1
0.093	2.86327	2.08008	1
0.048	1.02678	2.06168	2
0.614	1.88636	2.05712	1
0.405	0.84435	2.04951	2
0.095	1.42562	2.03688	2
0.237	0.878808	2.03082	2
0.079	1.19869	2.02928	2
0.091	1.12792	2.00636	2
0.185	2.28354	1.99933	1
0.286	0.823893	1.99848	2
0.187	1.55842	1.97865	2
0.079	0.559439	1.95534	2
0.093	0.879283	1.94884	2
0.152	0.427216	1.94669	2
0.031	2.85532	1.93467	1
0.203	0.86333	1.92645	2
0.089	0.253004	1.9125	2
0.089	1.0109	1.91014	2
0.069	0.70762	1.88841	2
0.035	2.61944	1.88475	1
0.116	2.19353	1.88313	1
0.193	1.36307	1.86012	2
0.083	0.908571	1.85826	2
0.288	1.8865	1.84277	1
0.357	2.05447	1.83252	1
0.187	0.562679	1.80733	2
0.421	0.564364	1.80481	2
0.156	0.792873	1.78722	2
0.125	1.36795	1.76463	2
0.135	1.46011	1.75336	2
0.303	2.21643	1.75098	1
0.241	0.585034	1.75004	2
0.095	2.86849	1.74557	1
0.193	4.90345	1.72765	1
0.158	0.641785	1.70438	2
0.044	0.466993	1.70108	2
0.286	1.33555	1.6912	2
0.34	1.90072	1.68981	1
0.041	0.99822	1.67378	2
0.137	1.21449	1.66406	2
0.237	2.94338	1.62479	1
0.064	0.935593	1.62252	2
0.459	0.883237	1.62045	2
0.133	4.23507	1.61007	1
0.062	0.51472	1.57334	2
0.095	0.935618	1.56287	2
0.249	0.361813	1.55688	2
0.141	2.7532	1.55599	1
0.096	4.97011	1.55303	1
0.152	1.33957	1.55276	2
0.042	0.478985	1.54586	2
0.203	0.656894	1.54567	2
0.189	1.12139	1.53431	2
0.039	0.233601	1.53407	2
0.141	2.21674	1.52593	1
0.05	0.31117	1.52458	2
0.091	0.435431	1.51772	2
0.073	0.946624	1.50116	2
0.206	0.576937	1.49659	2
0.208	1.03594	1.49272	2
0.149	2.26064	1.48165	1
0.145	0.258309	1.47038	2
0.152	2.13853	1.45895	1
0.112	3.18538	1.44239	1
0.235	1.09541	1.43271	2
0.235	1.09541	1.43271	2
0.185	0.919274	1.41796	2
0.199	1.79839	1.40127	1
0.152	1.85373	1.39215	1
0.446	1.0179	1.37937	2
0.147	0.701941	1.37846	2
0.164	0.720966	1.37564	2
0.081	0.570827	1.36963	2
0.118	0.294445	1.36894	2
0.185	5.42556	1.36375	1
0.152	1.59148	1.35296	2
0.299	1.46911	1.34816	2
0.066	0.273236	1.34619	2
0.048	1.27806	1.32103	2
0.002	4.57094	1.31819	1
0.052	0.0167632	1.30772	2
0.137	0.460665	1.2977	2
0.039	0.823216	1.26182	2
0.058	3.69819	1.24465	1
0.071	0.752758	1.22211	2
0.058	5.2811	1.21666	1
0.216	1.38795	1.18389	2
0.062	0.390812	1.14837	2
0.139	0.584591	1.13395	2
0.042	1.61042	1.11707	2
0.041	0.675848	1.0961	2
0.145	0.565071	1.07313	2
0.095	1.34523	1.06943	2
0.019	0.393098	1.06472	2
0.106	1.56596	1.04163	2
0.052	1.71644	0.966935	2
0.052	1.71644	0.966935	2
0.288	1.6164	0.957738	2
0.116	0.396015	0.906536	2
0.029	1.37903	0.890976	2
0.187	0.926665	0.831455	2
0.112	0.264857	0.79337	2
0.029	0.275073	0.718348	2
0.062	0.175661	0.171467	2
0.093	1.80305	1.86812	1
0.064	3.19769	0.965871	1
0.002	2.38571	0.431982	1
0.066	0.90279	1.53605	2
0.102	0.444126	1.44939	2
0.129	0.792939	1.16948	2
0.095	1.90497	1.5373	1
0.079	2.81128	1.75226	1
0.118	1.02724	2.51327	2
0.494	2.04048	3.27171	1
0.189	0.980345	2.46408	2
0.239	2.8761	1.44434	1
0.075	2.86645	2.08409	1
0.127	2.18647	1.44629	1
0.201	1.13902	3.23364	3
0.108	2.94521	0.60364	1
0.214	0.704819	2.13732	2
0.112	5.149	2.0596	1
0.162	2.80667	2.1223	1
0.164	0.923246	3.90301	3
0.05	2.32586	1.50191	1
0.135	2.18127	1.69318	1
0.154	3.60295	1.4127	1
0.056	1.23011	1.25424	2
0.125	3.31478	1.29068	1
0.363	1.78138	3.01378	1
0.133	0.486806	2.79941	2
0.203	2.21162	1.76511	1
0.039	2.41047	2.52644	1
0.044	5.04684	4.67228	1
0.077	0.38498	1.91576	2
0.174	0.775838	1.01109	2
0.114	2.78828	1.62059	1
0.039	4.46621	1.82671	1
0.083	0.543421	0.767407	2
0.079	1.75434	4.75288	1
0.112	0.366706	2.15656	2
0.181	3.49123	1.55597	1
0.131	3.561	2.03329	1
0.178	1.88708	1.71744	1
0.17	2.22109	1.26268	1
0.044	3.27013	3.02557	1
0.1	2.40587	0.870359	1
0.11	1.20747	2.4249	2
0.046	0.829212	1.27937	2
0.214	0.593473	1.75774	2
0.041	2.29408	2.97326	1
0.162	2.68996	5.58027	1
0.303	0.737283	1.3168	2
0.222	1.14709	3.57911	3
0.247	1.23551	0.880609	2
0.239	1.20438	1.49114	2
0.046	0.100817	1.99568	2
0.114	0.435187	9.78105	3
0.11	0.470805	2.65784	2
0.183	1.31381	3.22709	3
0.069	2.72732	2.25129	1
0.079	1.05165	2.36697	2
0.112	1.0497	2.17933	2
0.104	1.06115	2.91115	3
0.208	0.645118	1.94437	2
0.141	1.29391	1.42432	2
0.149	0.437631	3.27205	3
0.108	0.438667	2.57874	2
0.05	0.158647	2.93792	2
0.145	0.250416	3.61798	3
0.139	0.215172	5.69981	3
0.031	0.0261288	4.96688	3
0.201	1.02701	2.13068	2
0.044	1.08832	5.3918	3
0.154	1.25246	1.98072	2
0.096	0.445429	1.22934	2
0.095	0.781733	2.98452	3
0.108	0.333297	2.41683	2
0.162	0.904566	1.22139	2
0.143	0.487913	4.1576	3
0.073	0.399057	3.05609	2
0.154	1.92358	1.5241	1
0.124	0.666357	2.23846	2
0.096	0.0518215	3.24251	3
0.037	0.30251	0.416967	2
0.081	1.35735	3.64386	3
0.05	1.82805	2.47753	1
0.066	0.493311	2.33721	2
0.031	0.599675	4.23964	3
0.066	0.202371	2.02921	2
0.052	0.0855554	2.24908	2
0.095	0.829848	2.42043	2
0.234	1.69145	2.89974	1
0.068	0.250617	4.1746	3
0.239	0.572955	1.41537	2
0.066	0.468708	1.3565	2
0.156	0.797343	2.03848	2
0.033	0.417644	1.9083	2
0.085	0.96868	1.79236	2
0.066	0.182757	3.99552	3
0.052	0.389592	2.34786	2
0.052	0.389592	2.34786	2
