# Supplementary material for: Interaction between Teneurin-2 and microtubules via EB proteins provides a platform for GABAA receptor exocytosis
Source: eLife journal article supplement (doi:10.7554/elife.83276), 2023-06-05
Supplement: fig2-data1 [file 2G.xlsx]

## Sheet: Fig. 1E
Cluster analysis of inhibitory postsynapses.
Index	marker	UMAP1	UMAP2	cluster	NLGN2 A: positive B: negative		Index	marker	UMAP1	UMAP2	cluster	IGSF9b A: positive B: negative		Index	marker	UMAP1	UMAP2	cluster	TEN2 A: positive B: negative
1	NLGN2	-6.51001	1.511	1	A		294	IGSF9b	-6.54325	1.55494	1	A		630	TEN2	0.169325	9.27551	3	B
2	NLGN2	-6.52062	1.48616	1	A		295	IGSF9b	-6.52798	1.59092	1	A		631	TEN2	0.213421	9.26168	3	B
3	NLGN2	-6.43791	1.38953	1	A		296	IGSF9b	-6.49383	1.46739	1	B		632	TEN2	0.217907	9.17136	3	B
4	NLGN2	-6.11417	1.39722	1	B		297	IGSF9b	-4.25686	2.15756	1	A		633	TEN2	0.186184	9.26248	3	B
5	NLGN2	-5.62154	1.27461	1	A		298	IGSF9b	-6.41918	1.42544	1	A		634	TEN2	0.216608	9.16311	3	B
6	NLGN2	-5.87559	0.592276	1	A		299	IGSF9b	-6.39325	1.39893	1	B		635	TEN2	1.37547	9.07034	3	B
7	NLGN2	-6.36556	-1.21949	1	B		300	IGSF9b	-6.30095	1.32914	1	B		636	TEN2	-3.72295	3.29446	1	A
8	NLGN2	-5.39394	0.88126	1	A		301	IGSF9b	-5.61353	1.21048	1	A		637	TEN2	1.22967	9.06992	3	B
9	NLGN2	-5.4425	0.895376	1	A		302	IGSF9b	-5.59769	1.0498	1	B		638	TEN2	1.29932	8.97214	3	B
10	NLGN2	-5.77634	0.380329	1	A		303	IGSF9b	-4.28935	2.00368	1	B		639	TEN2	1.22236	8.79827	3	B
11	NLGN2	-6.40228	-1.57725	1	A		304	IGSF9b	-6.37207	-1.35332	1	B		640	TEN2	1.367	8.95228	3	B
12	NLGN2	-4.04148	2.28041	1	A		305	IGSF9b	-4.12703	2.21981	1	B		641	TEN2	1.41055	8.82494	3	B
13	NLGN2	-6.29938	-1.34111	1	A		306	IGSF9b	-5.65885	0.639495	1	A		642	TEN2	1.64134	8.42116	3	A
14	NLGN2	-4.45335	1.205	1	A		307	IGSF9b	-6.4149	-1.62325	1	B		643	TEN2	1.72766	8.25194	3	B
15	NLGN2	-6.27673	-1.50823	1	A		308	IGSF9b	-6.42857	-1.62172	1	B		644	TEN2	-3.84195	2.83817	1	B
16	NLGN2	-5.78497	-1.07611	1	A		309	IGSF9b	-4.03579	2.24744	1	A		645	TEN2	1.88365	7.93258	3	B
17	NLGN2	-5.70178	-0.983645	1	A		310	IGSF9b	-4.88237	0.84488	1	B		646	TEN2	-3.39249	3.56309	1	B
18	NLGN2	-5.67031	-0.887445	1	A		311	IGSF9b	-6.40692	-1.67716	1	B		647	TEN2	1.91563	7.72015	3	B
19	NLGN2	-4.10856	1.69815	1	A		312	IGSF9b	-6.40463	-1.67775	1	B		648	TEN2	-3.45266	3.32026	1	A
20	NLGN2	-5.10588	-0.277695	1	B		313	IGSF9b	-5.80036	-1.13016	1	B		649	TEN2	-3.35735	3.49093	1	A
21	NLGN2	-5.6842	-1.24749	1	A		314	IGSF9b	-3.97446	2.25813	1	A		650	TEN2	0.971025	7.3126	3	A
22	NLGN2	-5.90459	-1.42751	1	B		315	IGSF9b	-6.35898	-1.73013	1	B		651	TEN2	2.0281	7.0309	3	B
23	NLGN2	-5.50433	-1.05695	1	A		316	IGSF9b	-5.59393	-1.01688	1	B		652	TEN2	2.72145	7.04874	3	B
24	NLGN2	-5.48244	-1.06218	1	A		317	IGSF9b	-4.99382	-0.134844	1	B		653	TEN2	-3.99886	2.22141	1	B
25	NLGN2	-5.74563	-1.46737	1	A		318	IGSF9b	-4.43253	1.014	1	B		654	TEN2	2.64955	6.90409	3	B
26	NLGN2	-5.61701	-1.45546	1	A		319	IGSF9b	-4.7695	0.245913	1	A		655	TEN2	-3.51588	2.69567	1	B
27	NLGN2	-5.96611	-2.64053	1	A		320	IGSF9b	-4.96857	-0.177691	1	B		656	TEN2	2.55167	5.43245	3	B
28	NLGN2	-5.58918	-1.48192	1	A		321	IGSF9b	-4.91534	-0.123874	1	A		657	TEN2	2.69553	5.30451	3	B
29	NLGN2	-3.76922	2.22079	1	B		322	IGSF9b	-5.69504	-1.51494	1	B		658	TEN2	1.03281	4.81177	3	B
30	NLGN2	-3.73892	3.10964	1	A		323	IGSF9b	-6.0519	-1.95187	1	B		659	TEN2	1.44574	5.49106	3	B
31	NLGN2	-4.5404	-0.230919	1	A		324	IGSF9b	-5.09921	-1.14315	1	B		660	TEN2	2.03157	5.57674	3	B
32	NLGN2	-4.97186	-1.38372	1	A		325	IGSF9b	-5.8815	-2.36406	1	B		661	TEN2	-4.25888	2.09445	1	B
33	NLGN2	-4.40269	-1.06627	1	A		326	IGSF9b	-5.90925	-2.80792	1	B		662	TEN2	3.03338	4.95488	3	B
34	NLGN2	-4.6805	-0.943346	1	A		327	IGSF9b	-5.19873	-1.40885	1	B		663	TEN2	-3.60943	2.15974	1	B
35	NLGN2	-3.68363	3.04431	1	A		328	IGSF9b	-4.54435	-0.106773	1	B		664	TEN2	0.990257	4.61037	3	B
36	NLGN2	-3.73094	3.17918	1	A		329	IGSF9b	-5.45175	-1.66548	1	B		665	TEN2	3.52233	4.45881	3	B
37	NLGN2	-4.14263	-0.942502	1	A		330	IGSF9b	-5.78026	-2.57699	1	B		666	TEN2	-3.71588	2.11615	1	B
38	NLGN2	-3.411	1.12811	1	A		331	IGSF9b	-5.85628	-2.84795	1	B		667	TEN2	-3.03114	1.83447	1	B
39	NLGN2	-3.57939	-0.201092	1	A		332	IGSF9b	-4.77292	-1.25347	1	B		668	TEN2	-2.09264	2.20756	1	B
40	NLGN2	-3.35864	1.02126	1	A		333	IGSF9b	-4.47067	-0.23387	1	B		669	TEN2	1.10017	3.93757	3	B
41	NLGN2	-3.88235	-2.58952	1	A		334	IGSF9b	-5.79661	-2.93871	1	B		670	TEN2	1.93398	3.95608	3	B
42	NLGN2	-3.80052	-1.20028	1	A		335	IGSF9b	-4.85055	-1.40121	1	B		671	TEN2	3.63591	3.92993	3	B
43	NLGN2	-3.8184	-2.60371	1	A		336	IGSF9b	-3.55674	2.08956	1	B		672	TEN2	2.04635	3.86143	3	B
44	NLGN2	-3.61974	-0.936106	1	A		337	IGSF9b	-5.63505	-2.52701	1	B		673	TEN2	-3.07885	1.66557	1	B
45	NLGN2	-3.40585	-0.628228	1	A		338	IGSF9b	-5.75915	-2.93003	1	B		674	TEN2	2.35914	3.89496	3	B
46	NLGN2	-3.85337	-2.733	1	A		339	IGSF9b	-4.78372	-1.35293	1	B		675	TEN2	3.71869	3.93248	3	B
47	NLGN2	-3.69978	-2.49337	1	A		340	IGSF9b	-3.95532	-2.53101	1	B		676	TEN2	3.77433	3.88822	3	B
48	NLGN2	-3.16615	2.03536	1	A		341	IGSF9b	-4.83959	-1.41566	1	B		677	TEN2	1.44836	3.51402	3	B
49	NLGN2	-3.40023	-0.747323	1	A		342	IGSF9b	-5.774	-2.97707	1	B		678	TEN2	-2.19136	1.75555	1	B
50	NLGN2	-5.69636	-3.20101	1	A		343	IGSF9b	-4.00354	-0.894029	1	A		679	TEN2	-2.96261	1.45724	1	B
51	NLGN2	-5.53876	-3.29075	1	A		344	IGSF9b	-3.57883	2.4352	1	A		680	TEN2	-3.87949	1.28356	1	B
52	NLGN2	-3.60677	-2.88755	1	A		345	IGSF9b	-4.72948	-1.56059	1	B		681	TEN2	2.4954	2.90007	3	B
53	NLGN2	-3.57807	-2.50523	1	A		346	IGSF9b	-3.36241	1.24383	1	B		682	TEN2	-2.29222	1.61962	1	B
54	NLGN2	-3.43602	-0.835692	1	A		347	IGSF9b	-3.33253	0.191493	1	A		683	TEN2	-3.34613	1.26321	1	A
55	NLGN2	-3.82947	-2.7353	1	A		348	IGSF9b	-3.46901	-0.175115	1	B		684	TEN2	-2.28954	1.59389	1	A
56	NLGN2	-3.53583	3.2641	1	A		349	IGSF9b	-4.966	-3.01796	1	B		685	TEN2	-2.93853	1.33599	1	A
57	NLGN2	-3.04567	-0.505214	1	B		350	IGSF9b	-3.23553	1.30012	1	B		686	TEN2	3.85961	2.33983	2	B
58	NLGN2	-3.51462	-3.05786	1	A		351	IGSF9b	-5.67027	-3.1357	1	B		687	TEN2	-3.75029	1.18272	1	B
59	NLGN2	-3.56664	-3.25958	1	A		352	IGSF9b	-3.72266	-2.48705	1	B		688	TEN2	2.23265	2.67167	3	B
60	NLGN2	-3.00479	0.171966	1	A		353	IGSF9b	-3.54601	-1.10818	1	B		689	TEN2	2.17348	2.65397	3	B
61	NLGN2	-2.98513	1.115	1	B		354	IGSF9b	-3.23344	0.252372	1	B		690	TEN2	3.67353	1.80888	2	B
62	NLGN2	-5.55368	-3.33752	1	A		355	IGSF9b	-5.68459	-3.19217	1	B		691	TEN2	-1.89772	1.38951	1	B
63	NLGN2	-5.58341	-3.37959	1	A		356	IGSF9b	-3.47962	-1.00928	1	B		692	TEN2	3.46028	1.76357	2	B
64	NLGN2	-3.54098	3.31544	1	A		357	IGSF9b	-3.92829	-3.17249	1	B		693	TEN2	-5.51555	1.25383	1	B
65	NLGN2	-3.51441	-3.29635	1	A		358	IGSF9b	-3.70427	-2.87967	1	B		694	TEN2	-3.9439	1.1312	1	B
66	NLGN2	-3.18001	-2.4696	1	A		359	IGSF9b	-3.19624	0.344089	1	B		695	TEN2	-2.7122	0.626876	1	B
67	NLGN2	-2.94194	0.411532	1	A		360	IGSF9b	-3.70443	-2.656	1	B		696	TEN2	-4.7484	1.05855	1	B
68	NLGN2	-2.90963	-0.00803476	1	A		361	IGSF9b	-3.16867	-0.0745552	1	B		697	TEN2	0.983661	0.311593	2	B
69	NLGN2	-3.15854	-2.44021	1	A		362	IGSF9b	-3.5689	3.12229	1	B		698	TEN2	2.92307	0.737356	2	B
70	NLGN2	-2.92849	-2.14406	1	A		363	IGSF9b	-5.52866	-3.25459	1	A		699	TEN2	-4.51965	0.958587	1	B
71	NLGN2	-5.53927	-3.37014	1	A		364	IGSF9b	-3.06727	1.27032	1	B		700	TEN2	-2.70264	0.243847	1	A
72	NLGN2	-2.81671	-0.365745	1	A		365	IGSF9b	-3.56896	3.20181	1	B		701	TEN2	2.85294	0.56313	2	B
73	NLGN2	-3.41987	-3.36457	1	A		366	IGSF9b	-3.59001	3.20046	1	B		702	TEN2	0.913535	0.279768	2	B
74	NLGN2	-2.90365	0.319191	1	A		367	IGSF9b	-3.53283	3.24228	1	B		703	TEN2	-4.82535	0.920972	1	B
75	NLGN2	-3.33336	-3.40276	1	A		368	IGSF9b	-5.60148	-3.30492	1	B		704	TEN2	2.85746	0.530141	2	B
76	NLGN2	-3.06576	-3.24834	1	A		369	IGSF9b	-3.55861	-3.30999	1	B		705	TEN2	2.62123	0.292408	2	B
77	NLGN2	-2.79924	-0.181364	1	A		370	IGSF9b	-3.59891	3.17051	1	B		706	TEN2	1.22621	0.323597	2	B
78	NLGN2	-2.68216	-1.19729	1	A		371	IGSF9b	-3.34284	-3.40318	1	B		707	TEN2	-2.92398	-0.014809	1	B
79	NLGN2	-2.39947	-1.663	1	A		372	IGSF9b	-2.58867	2.15371	1	B		708	TEN2	4.53719	0.124354	2	B
80	NLGN2	-2.86123	-2.30927	1	A		373	IGSF9b	-2.80988	-2.0317	1	B		709	TEN2	3.9359	-0.220968	2	B
81	NLGN2	-2.91146	-2.43163	1	A		374	IGSF9b	-3.00362	-3.21812	1	B		710	TEN2	0.822342	-0.029315	2	B
82	NLGN2	-2.3881	1.90085	1	A		375	IGSF9b	-2.6997	-0.997008	1	B		711	TEN2	2.06475	0.0718288	2	B
83	NLGN2	-2.38005	-1.5356	1	A		376	IGSF9b	-2.81505	-0.249104	1	B		712	TEN2	1.78384	-0.221241	2	B
84	NLGN2	-3.12871	-3.64006	1	A		377	IGSF9b	-2.83156	-2.32167	1	B		713	TEN2	0.765271	-0.152985	2	B
85	NLGN2	-2.76802	-2.38363	1	A		378	IGSF9b	-2.80334	2.04785	1	B		714	TEN2	2.08708	-0.0899911	2	A
86	NLGN2	-2.61495	-3.50986	1	A		379	IGSF9b	-2.81	-3.29202	1	B		715	TEN2	-3.1858	-0.295972	1	B
87	NLGN2	-2.73235	0.170097	1	A		380	IGSF9b	-2.65402	-1.01555	1	B		716	TEN2	4.52581	-0.104827	2	B
88	NLGN2	-2.6775	-2.47302	1	A		381	IGSF9b	-2.35216	-1.58942	1	B		717	TEN2	0.492933	-0.37268	2	B
89	NLGN2	-2.70187	-3.16842	1	A		382	IGSF9b	-2.52646	-1.29596	1	A		718	TEN2	2.19618	-0.100791	2	B
90	NLGN2	-2.3438	1.99321	1	A		383	IGSF9b	-2.67571	-2.89102	1	B		719	TEN2	2.02782	-0.0835579	2	B
91	NLGN2	-2.55487	2.53937	1	A		384	IGSF9b	-2.71934	0.136325	1	A		720	TEN2	0.40534	-0.484476	2	A
92	NLGN2	-2.44051	-1.66918	1	A		385	IGSF9b	-2.48593	-1.94648	1	A		721	TEN2	1.87065	-0.17381	2	B
93	NLGN2	-2.47109	-3.63983	1	A		386	IGSF9b	-2.2389	1.70649	1	B		722	TEN2	3.99754	-0.89519	2	B
94	NLGN2	-2.43923	-3.64955	1	A		387	IGSF9b	-2.06249	-5.08115	2	B		723	TEN2	1.10234	-0.30883	2	B
95	NLGN2	-2.61236	-2.88622	1	A		388	IGSF9b	-2.1089	-5.03005	2	B		724	TEN2	2.92179	-1.1264	2	B
96	NLGN2	-2.32547	-3.81584	1	A		389	IGSF9b	-2.44623	2.39173	1	B		725	TEN2	0.304657	-0.678105	2	B
97	NLGN2	-2.03258	-4.52552	2	A		390	IGSF9b	-2.31631	-1.76398	1	A		726	TEN2	1.22718	-0.340645	2	B
98	NLGN2	-3.34393	3.48859	1	A		391	IGSF9b	-2.1044	-5.21379	2	B		727	TEN2	1.59352	-0.358998	2	B
99	NLGN2	-2.17647	1.70305	1	A		392	IGSF9b	-2.22125	1.92048	1	B		728	TEN2	-6.28722	1.38195	1	A
100	NLGN2	-2.15202	1.20021	1	A		393	IGSF9b	-2.08905	-5.18498	2	B		729	TEN2	0.563892	-0.467773	2	A
101	NLGN2	-2.09611	-1.91396	1	A		394	IGSF9b	-2.04721	-5.02343	2	B		730	TEN2	-4.59351	-0.1373	1	B
102	NLGN2	-2.15602	1.70383	1	A		395	IGSF9b	-2.63253	-2.37657	1	B		731	TEN2	-3.27501	-0.779833	1	B
103	NLGN2	-2.37203	-1.99714	1	A		396	IGSF9b	-1.98547	-4.34344	2	B		732	TEN2	1.40485	-0.459054	2	A
104	NLGN2	-3.36095	3.55811	1	A		397	IGSF9b	-2.16483	-3.98951	1	B		733	TEN2	1.63969	-0.457179	2	B
105	NLGN2	-1.98366	1.4816	1	A		398	IGSF9b	-2.59215	0.297944	1	B		734	TEN2	4.0852	-1.32024	2	B
106	NLGN2	-1.74642	-4.78915	2	B		399	IGSF9b	-2.49332	-2.56223	1	A		735	TEN2	-4.88411	-0.0417298	1	B
107	NLGN2	0.240551	9.19788	3	A		400	IGSF9b	-2.61642	2.69397	1	B		736	TEN2	-4.90628	-0.043081	1	B
108	NLGN2	-1.69641	-4.88896	2	A		401	IGSF9b	-2.45277	-2.56927	1	A		737	TEN2	0.709628	-1.40894	2	B
109	NLGN2	-1.29158	-3.85563	2	A		402	IGSF9b	-2.06486	-5.14997	2	B		738	TEN2	-5.44268	0.631306	1	B
110	NLGN2	-1.5215	-1.96151	2	A		403	IGSF9b	-1.85081	-4.17363	2	B		739	TEN2	-4.74303	-0.224762	1	B
111	NLGN2	0.394646	-0.500038	2	A		404	IGSF9b	-1.99241	-4.22544	2	B		740	TEN2	0.84452	-1.85266	2	B
112	NLGN2	-0.915973	-2.69834	2	A		405	IGSF9b	-2.03677	-5.103	2	B		741	TEN2	-2.32661	-1.7072	1	B
113	NLGN2	-1.51812	-4.54658	2	A		406	IGSF9b	-3.38548	3.46296	1	B		742	TEN2	2.75931	-2.03587	2	B
114	NLGN2	-1.95043	1.5514	1	A		407	IGSF9b	-1.91054	-4.5601	2	B		743	TEN2	0.211375	-1.40205	2	B
115	NLGN2	0.396989	-0.513117	2	B		408	IGSF9b	-1.76107	-4.32849	2	B		744	TEN2	2.67515	-1.99882	2	B
116	NLGN2	-2.5413	2.78297	1	A		409	IGSF9b	-1.86263	-4.63315	2	B		745	TEN2	0.669295	-1.69525	2	B
117	NLGN2	-1.16935	-4.56898	2	A		410	IGSF9b	-2.43298	2.51179	1	B		746	TEN2	0.731713	-1.77022	2	B
118	NLGN2	-1.77188	1.3473	1	A		411	IGSF9b	-1.14685	-2.35362	2	A		747	TEN2	-3.44402	-1.05185	1	A
119	NLGN2	-1.69921	1.29833	1	B		412	IGSF9b	-2.57235	2.73359	1	A		748	TEN2	2.76706	-2.07464	2	B
120	NLGN2	-0.589745	-3.28681	2	B		413	IGSF9b	-2.03373	-5.15721	2	B		749	TEN2	-0.191754	-1.81266	2	B
121	NLGN2	-1.20072	-4.86395	2	A		414	IGSF9b	-1.71186	-4.83073	2	A		750	TEN2	3.81876	-2.12131	2	B
122	NLGN2	0.477957	-0.417045	2	A		415	IGSF9b	-1.54341	-4.13087	2	A		751	TEN2	2.54947	-2.30711	2	B
123	NLGN2	-0.576775	-2.55355	2	A		416	IGSF9b	-2.11044	1.80719	1	B		752	TEN2	4.05878	-2.20592	2	B
124	NLGN2	-1.04603	-4.89068	2	A		417	IGSF9b	-1.41535	-3.98235	2	B		753	TEN2	-4.7551	-0.7214	1	A
125	NLGN2	-0.285362	-2.32221	2	A		418	IGSF9b	-1.21873	-3.77368	2	B		754	TEN2	2.68276	-2.21812	2	B
126	NLGN2	0.32486	8.92556	3	A		419	IGSF9b	-1.95373	-5.19815	2	A		755	TEN2	4.52086	-1.9024	2	B
127	NLGN2	1.18046	3.28554	3	A		420	IGSF9b	-3.23773	3.48627	1	B		756	TEN2	0.947358	-2.06004	2	B
128	NLGN2	-0.843867	-4.50323	2	A		421	IGSF9b	-1.22805	-4.60887	2	B		757	TEN2	2.72948	-2.45536	2	A
129	NLGN2	-0.204683	-2.37982	2	A		422	IGSF9b	-0.757784	-2.34802	2	B		758	TEN2	-4.59787	-1.15253	1	B
130	NLGN2	-0.322704	-3.97654	2	A		423	IGSF9b	-3.28642	3.56607	1	B		759	TEN2	-3.37597	-1.39014	1	B
131	NLGN2	0.7959	-0.252607	2	B		424	IGSF9b	0.269577	-0.991592	2	A		760	TEN2	-0.133732	-2.16329	2	B
132	NLGN2	-0.156201	-2.73743	2	A		425	IGSF9b	-0.181476	-2.10747	2	B		761	TEN2	2.39508	-2.47389	2	A
133	NLGN2	0.862365	0.121935	2	A		426	IGSF9b	-1.02382	-4.84278	2	B		762	TEN2	-2.64488	-2.07841	1	A
134	NLGN2	-0.672965	-5.24279	2	A		427	IGSF9b	-1.12267	-4.54518	2	B		763	TEN2	-2.87915	-2.10944	1	B
135	NLGN2	0.844213	0.248841	2	A		428	IGSF9b	-0.196224	-2.10729	2	B		764	TEN2	3.54609	-2.98404	2	B
136	NLGN2	-0.129035	-3.27799	2	B		429	IGSF9b	-0.986346	-4.6455	2	B		765	TEN2	3.49415	-2.98245	2	B
137	NLGN2	0.872805	-0.182618	2	A		430	IGSF9b	-1.0288	-4.73509	2	B		766	TEN2	2.55764	-2.602	2	A
138	NLGN2	1.24715	3.09592	3	B		431	IGSF9b	0.672448	-0.103371	2	B		767	TEN2	-0.234049	-2.39055	2	B
139	NLGN2	0.809816	0.258837	2	A		432	IGSF9b	-0.953377	-4.66496	2	B		768	TEN2	-0.269181	-2.3724	2	A
140	NLGN2	0.0991143	-2.21556	2	A		433	IGSF9b	-2.50751	2.74922	1	B		769	TEN2	-3.36953	-2.20425	1	B
141	NLGN2	0.759841	0.642178	2	A		434	IGSF9b	-0.932848	-4.71476	2	B		770	TEN2	3.48596	-3.07902	2	B
142	NLGN2	0.873097	7.65164	3	A		435	IGSF9b	0.632737	-0.092174	2	B		771	TEN2	-5.0399	-1.16487	1	A
143	NLGN2	-0.835114	-4.89312	2	A		436	IGSF9b	-0.196309	-3.64077	2	B		772	TEN2	-6.46287	1.44391	1	A
144	NLGN2	0.803166	0.201003	2	A		437	IGSF9b	-0.538801	-4.21226	2	B		773	TEN2	3.42281	-3.16435	2	B
145	NLGN2	1.31136	3.19558	3	A		438	IGSF9b	1.16535	3.60891	3	A		774	TEN2	4.1073	-3.40366	2	B
146	NLGN2	0.14679	-3.60696	2	A		439	IGSF9b	1.1024	3.87964	3	B		775	TEN2	-0.248305	-2.60218	2	B
147	NLGN2	1.32911	-0.373055	2	A		440	IGSF9b	1.04372	4.2526	3	B		776	TEN2	-2.73867	-2.27746	1	B
148	NLGN2	0.460648	-1.99533	2	A		441	IGSF9b	1.21226	3.5786	3	A		777	TEN2	1.10704	-3.6851	2	B
149	NLGN2	1.02282	0.0243076	2	A		442	IGSF9b	-0.916043	-4.98801	2	A		778	TEN2	-0.0237935	-3.18685	2	B
150	NLGN2	1.1197	4.93503	3	B		443	IGSF9b	-0.060159	-3.24809	2	B		779	TEN2	-5.44161	-1.1493	1	B
151	NLGN2	0.385259	-2.05154	2	A		444	IGSF9b	-0.0822279	-3.67005	2	B		780	TEN2	1.09389	-3.7115	2	B
152	NLGN2	0.822138	0.78575	2	A		445	IGSF9b	0.82411	0.465512	2	B		781	TEN2	0.56465	-3.03779	2	B
153	NLGN2	1.3787	5.86492	3	A		446	IGSF9b	-0.654695	-5.23392	2	B		782	TEN2	-6.24052	1.00017	1	B
154	NLGN2	0.941045	0.329411	2	A		447	IGSF9b	0.00379733	-3.17456	2	B		783	TEN2	3.74961	-4.50626	2	B
155	NLGN2	1.06254	0.253432	2	B		448	IGSF9b	1.18235	3.71826	3	B		784	TEN2	1.09612	-3.74298	2	B
156	NLGN2	0.962103	7.67378	3	A		449	IGSF9b	-0.6005	-5.28408	2	B		785	TEN2	4.16763	-4.56816	2	B
157	NLGN2	1.09056	4.92374	3	B		450	IGSF9b	1.18403	3.8229	3	B		786	TEN2	-5.183	-1.44141	1	B
158	NLGN2	0.17965	-3.91863	2	A		451	IGSF9b	0.111147	-3.57059	2	B		787	TEN2	-6.46281	1.43507	1	A
159	NLGN2	0.413742	8.68237	3	B		452	IGSF9b	1.14759	-0.249979	2	B		788	TEN2	-0.144013	-3.40294	2	B
160	NLGN2	1.51014	-0.360954	2	A		453	IGSF9b	0.985583	0.0882085	2	A		789	TEN2	3.84236	-4.59361	2	B
161	NLGN2	0.540642	8.15437	3	B		454	IGSF9b	0.486508	-2.08435	2	B		790	TEN2	3.41418	-4.58148	2	B
162	NLGN2	1.54353	-0.410336	2	A		455	IGSF9b	0.668335	-1.78929	2	B		791	TEN2	0.430928	-3.62539	2	B
163	NLGN2	0.809042	-2.01464	2	A		456	IGSF9b	1.40219	3.3947	3	A		792	TEN2	4.37026	-4.85426	2	B
164	NLGN2	0.938545	-3.63989	2	A		457	IGSF9b	0.484462	8.15425	3	A		793	TEN2	-3.63497	-2.73562	1	A
165	NLGN2	0.904857	-3.73949	2	A		458	IGSF9b	0.747297	-1.78115	2	B		794	TEN2	4.3029	-4.85599	2	A
166	NLGN2	0.454612	-2.91875	2	A		459	IGSF9b	-0.45442	-5.39713	2	B		795	TEN2	3.93863	-4.78906	2	B
167	NLGN2	0.590775	-2.64341	2	A		460	IGSF9b	1.51333	3.29811	3	B		796	TEN2	1.02172	-3.84523	2	B
168	NLGN2	0.989738	-3.70828	2	A		461	IGSF9b	0.757612	-2.02997	2	B		797	TEN2	3.45453	-4.76478	2	B
169	NLGN2	0.884447	-2.10282	2	A		462	IGSF9b	0.592765	8.08024	3	B		798	TEN2	0.654781	-3.69539	2	B
170	NLGN2	0.84949	-2.26145	2	A		463	IGSF9b	0.770995	-1.84367	2	B		799	TEN2	-3.70619	-2.79642	1	A
171	NLGN2	1.83605	-0.201186	2	A		464	IGSF9b	0.82285	-1.89582	2	B		800	TEN2	4.35505	-4.95239	2	B
172	NLGN2	0.593068	8.11413	3	A		465	IGSF9b	1.18612	4.90277	3	B		801	TEN2	-3.44861	-2.98344	1	B
173	NLGN2	2.53297	-6.3739	2	A		466	IGSF9b	1.5096	3.51507	3	A		802	TEN2	-5.90816	-1.32316	1	B
174	NLGN2	0.515564	8.17053	3	B		467	IGSF9b	1.16621	4.99538	3	B		803	TEN2	0.495271	-3.68908	2	B
175	NLGN2	1.71327	-0.296101	2	A		468	IGSF9b	0.754773	-3.83529	2	B		804	TEN2	0.472218	-3.68803	2	B
176	NLGN2	0.514712	8.12758	3	A		469	IGSF9b	1.20003	5.0045	3	B		805	TEN2	0.980454	-3.86488	2	B
177	NLGN2	0.991068	7.75742	3	B		470	IGSF9b	0.852039	-2.00868	2	B		806	TEN2	-2.43006	-3.64012	1	B
178	NLGN2	2.57438	-6.25077	2	A		471	IGSF9b	1.42278	5.70377	3	A		807	TEN2	-2.57251	-3.51066	1	B
179	NLGN2	2.08515	2.65937	3	A		472	IGSF9b	1.05708	7.63684	3	B		808	TEN2	0.535536	-3.61258	2	B
180	NLGN2	1.04526	-3.80216	2	A		473	IGSF9b	1.72425	2.9376	3	A		809	TEN2	3.24472	-5.0531	2	B
181	NLGN2	2.09806	3.07155	3	A		474	IGSF9b	2.06301	2.48649	3	B		810	TEN2	3.21368	-5.05915	2	B
182	NLGN2	1.97661	3.74551	3	B		475	IGSF9b	1.49125	5.61689	3	B		811	TEN2	3.78918	-5.13978	2	B
183	NLGN2	2.72427	-5.46986	2	A		476	IGSF9b	1.83294	-0.202118	2	B		812	TEN2	4.27022	-5.25544	2	B
184	NLGN2	2.70928	-2.07073	2	A		477	IGSF9b	0.991091	-3.81994	2	B		813	TEN2	-6.53322	1.5124	1	A
185	NLGN2	2.74059	-5.59362	2	A		478	IGSF9b	1.5333	5.80334	3	B		814	TEN2	-1.40628	-3.9958	2	B
186	NLGN2	2.43155	-6.66548	2	A		479	IGSF9b	2.02223	2.92827	3	B		815	TEN2	-1.02168	-3.99999	2	B
187	NLGN2	1.19961	-3.63183	2	A		480	IGSF9b	1.57111	5.58662	3	B		816	TEN2	4.25402	-5.25325	2	B
188	NLGN2	2.46469	-6.55646	2	A		481	IGSF9b	2.4157	-6.65616	2	B		817	TEN2	-0.30032	-4.00736	2	B
189	NLGN2	2.73832	-5.4686	2	A		482	IGSF9b	2.04547	3.87626	3	B		818	TEN2	-6.36691	1.24282	1	B
190	NLGN2	1.5567	5.38827	3	B		483	IGSF9b	1.47406	5.58604	3	B		819	TEN2	4.30628	-6.05485	2	B
191	NLGN2	1.81155	5.72072	3	A		484	IGSF9b	0.587704	8.2118	3	B		820	TEN2	3.88526	-5.36792	2	B
192	NLGN2	1.36359	7.67397	3	A		485	IGSF9b	2.11377	2.74674	3	B		821	TEN2	2.75578	-5.44382	2	B
193	NLGN2	1.77465	5.48478	3	A		486	IGSF9b	1.66096	5.54592	3	B		822	TEN2	-6.32316	-1.23491	1	A
194	NLGN2	2.32101	2.89197	3	A		487	IGSF9b	2.05637	2.62943	3	A		823	TEN2	2.81012	-5.54475	2	B
195	NLGN2	1.7361	5.66408	3	A		488	IGSF9b	1.50138	5.45709	3	B		824	TEN2	-6.50325	1.47269	1	B
196	NLGN2	2.43708	-6.63326	2	A		489	IGSF9b	2.56037	-6.29962	2	B		825	TEN2	-0.91554	-4.60589	2	B
197	NLGN2	1.88624	5.69689	3	A		490	IGSF9b	1.553	5.90078	3	B		826	TEN2	3.81214	-5.85956	2	B
198	NLGN2	2.89805	-1.37894	2	B		491	IGSF9b	1.46137	5.45292	3	B		827	TEN2	2.93298	-6.06759	2	B
199	NLGN2	2.87831	-2.13368	2	A		492	IGSF9b	0.565796	8.2493	3	B		828	TEN2	-1.58966	-4.63884	2	A
200	NLGN2	2.91538	0.688123	2	A		493	IGSF9b	1.10115	7.70395	3	B		829	TEN2	2.84121	-6.0781	2	A
201	NLGN2	2.48186	2.91966	3	A		494	IGSF9b	1.79809	5.62417	3	A		830	TEN2	2.93623	-6.15781	2	A
202	NLGN2	2.53553	5.36209	3	B		495	IGSF9b	2.04502	3.82149	3	B		831	TEN2	-0.8904	-4.79988	2	B
203	NLGN2	2.99562	0.26612	2	B		496	IGSF9b	2.48992	-6.71949	2	B		832	TEN2	3.78057	-6.14268	2	B
204	NLGN2	3.24519	-3.05198	2	A		497	IGSF9b	2.16257	2.46055	3	B		833	TEN2	-1.5574	-4.79195	2	B
205	NLGN2	3.24647	-0.0766628	2	B		498	IGSF9b	2.13591	3.12073	3	B		834	TEN2	-1.95291	-5.05244	2	A
206	NLGN2	2.43336	3.96364	3	A		499	IGSF9b	2.47263	-2.54526	2	B		835	TEN2	-1.97535	-5.00316	2	A
207	NLGN2	1.97573	5.76554	3	A		500	IGSF9b	2.11548	3.9517	3	A		836	TEN2	-1.6796	-4.89241	2	B
208	NLGN2	3.46392	-1.98503	2	A		501	IGSF9b	1.5917	6.04101	3	A		837	TEN2	3.8326	-6.77433	2	A
209	NLGN2	3.35229	-2.85319	2	A		502	IGSF9b	2.1232	3.91931	3	B		838	TEN2	-0.841327	-4.95934	2	B
210	NLGN2	2.66497	2.86146	3	A		503	IGSF9b	2.51298	-6.36215	2	B		839	TEN2	2.43568	-6.56122	2	B
211	NLGN2	2.8721	3.65096	3	A		504	IGSF9b	2.61008	-2.31838	2	B		840	TEN2	3.90156	-6.85723	2	B
212	NLGN2	2.94263	-6.11833	2	B		505	IGSF9b	2.43336	-6.58796	2	B		841	TEN2	3.84263	-6.87682	2	B
213	NLGN2	3.41106	-4.87528	2	A		506	IGSF9b	2.44377	-6.70239	2	B		842	TEN2	3.76176	-6.9809	2	B
214	NLGN2	2.82468	3.19886	3	A		507	IGSF9b	2.17685	3.81214	3	B		843	TEN2	-2.43406	-1.97213	1	A
215	NLGN2	3.69551	-2.03327	2	A		508	IGSF9b	2.32904	2.82585	3	B		844	TEN2	-6.3779	-1.70941	1	A
216	NLGN2	2.91211	3.8978	3	A		509	IGSF9b	2.59042	-2.51147	2	B		845	TEN2	-5.68952	-3.18886	1	A
217	NLGN2	3.94944	-0.268644	2	A		510	IGSF9b	1.88135	6.68194	3	B		846	TEN2	1.08402	-3.7596	2	A
218	NLGN2	1.77722	7.97444	3	B		511	IGSF9b	2.82533	-1.07191	2	A		847	TEN2	3.89844	-4.87927	2	A
219	NLGN2	3.7631	-4.47438	2	B		512	IGSF9b	2.6965	-2.38401	2	B		848	TEN2	2.71975	-5.6429	2	A
220	NLGN2	3.78471	-2.05489	2	A		513	IGSF9b	2.84151	-1.987	2	B		849	TEN2	-2.72333	-3.01423	1	A
221	NLGN2	1.66857	8.35978	3	A		514	IGSF9b	1.86965	6.55452	3	B		850	TEN2	-4.93666	-1.23803	1	A
222	NLGN2	2.85212	5.03304	3	B		515	IGSF9b	2.84765	-1.23248	2	B		851	TEN2	1.31546	0.322725	2	A
223	NLGN2	3.05378	3.63778	3	A		516	IGSF9b	2.50402	-6.71405	2	B		852	TEN2	-2.87299	1.71162	1	A
224	NLGN2	4.01001	-1.21229	2	A		517	IGSF9b	2.84085	-6.15044	2	B		853	TEN2	1.74577	0.193471	2	A
225	NLGN2	0.191639	9.26389	3	B		518	IGSF9b	3.44264	-4.59154	2	B		854	TEN2	-5.5429	-1.48149	1	A
226	NLGN2	3.95414	-3.31036	2	A		519	IGSF9b	2.53908	3.88465	3	B		855	TEN2	-4.67048	-0.256395	1	A
227	NLGN2	2.50724	7.10405	3	A		520	IGSF9b	1.91056	5.74409	3	B		856	TEN2	-3.70778	-2.93527	1	A
228	NLGN2	3.68036	1.83897	2	B		521	IGSF9b	2.36622	4.24799	3	B		857	TEN2	1.33918	3.65526	3	B
229	NLGN2	2.66302	5.37568	3	A		522	IGSF9b	3.2807	1.22205	2	B		858	TEN2	-5.9496	-2.70635	1	B
230	NLGN2	0.213834	9.27688	3	B		523	IGSF9b	2.87693	-5.94296	2	B		859	TEN2	2.93162	-1.49179	2	B
231	NLGN2	3.71114	-6.01785	2	A		524	IGSF9b	1.96935	6.12843	3	B		860	TEN2	-6.49421	1.50093	1	B
232	NLGN2	4.14008	-2.86489	2	A		525	IGSF9b	2.74248	3.92414	3	B		861	TEN2	-4.52445	-0.181802	1	B
233	NLGN2	3.19746	3.76344	3	B		526	IGSF9b	2.1103	6.91792	3	B		862	TEN2	1.53255	5.88565	3	B
234	NLGN2	3.26905	4.31934	3	A		527	IGSF9b	2.84937	-6.11013	2	B		863	TEN2	-3.72932	-2.78046	1	B
235	NLGN2	3.67437	2.10191	2	A		528	IGSF9b	2.8482	3.42008	3	B		864	TEN2	-3.32179	-2.32029	1	B
236	NLGN2	4.16278	-3.97744	2	B		529	IGSF9b	2.61993	5.33529	3	B		865	TEN2	-6.21373	-1.10043	1	B
237	NLGN2	3.7412	1.51952	2	A		530	IGSF9b	2.65842	2.87103	3	B		866	TEN2	-0.323914	-4.06084	2	B
238	NLGN2	0.161939	9.28747	3	A		531	IGSF9b	2.86591	-6.18392	2	B		867	TEN2	-6.23355	-1.38006	1	B
239	NLGN2	4.25121	-0.134013	2	A		532	IGSF9b	2.90793	3.43514	3	B		868	TEN2	-2.21167	1.6805	1	B
240	NLGN2	1.64273	8.48162	3	A		533	IGSF9b	1.78996	7.96625	3	B		869	TEN2	3.59276	1.70676	2	B
241	NLGN2	4.239	-2.38926	2	A		534	IGSF9b	3.52826	-4.56892	2	B		870	TEN2	-3.34088	-2.17457	1	B
242	NLGN2	3.43734	3.89115	3	B		535	IGSF9b	2.63458	5.28502	3	B		871	TEN2	-3.33784	0.112329	1	B
243	NLGN2	4.20383	-4.95095	2	A		536	IGSF9b	2.9334	-6.29997	2	B		872	TEN2	-4.25961	2.20361	1	B
244	NLGN2	4.31608	-1.23031	2	A		537	IGSF9b	3.56165	1.19349	2	B		873	TEN2	4.2181	-2.22409	2	B
245	NLGN2	3.85889	2.34337	2	B		538	IGSF9b	1.89778	7.73852	3	B		874	TEN2	2.67537	-6.21555	2	B
246	NLGN2	3.83165	2.47453	2	A		539	IGSF9b	2.73427	5.20546	3	B		875	TEN2	-5.17798	-1.43511	1	B
247	NLGN2	3.15335	4.73501	3	B		540	IGSF9b	2.84006	4.00332	3	B		876	TEN2	-6.22928	1.13068	1	B
248	NLGN2	4.40427	0.215227	2	B		541	IGSF9b	3.68552	-4.63411	2	B		877	TEN2	3.71877	-6.85945	2	B
249	NLGN2	4.42109	-4.25497	2	A		542	IGSF9b	3.95167	-0.250167	2	B		878	TEN2	-3.3878	3.65364	1	B
250	NLGN2	4.04175	0.953822	2	A		543	IGSF9b	2.94352	3.83775	3	B		879	TEN2	4.2715	-1.1494	2	B
251	NLGN2	4.3724	-3.96475	2	A		544	IGSF9b	3.49521	1.31923	2	A		880	TEN2	-6.0082	-0.979963	1	B
252	NLGN2	4.43153	-0.417517	2	B		545	IGSF9b	3.7694	-2.03218	2	B		881	TEN2	-5.47869	0.611599	1	B
253	NLGN2	4.19873	-5.4047	2	A		546	IGSF9b	3.62974	1.11153	2	B		882	TEN2	-2.65983	-2.34066	1	B
254	NLGN2	3.53458	4.09074	3	A		547	IGSF9b	1.79619	8.19153	3	B		883	TEN2	-3.70288	-3.20356	1	B
255	NLGN2	3.95535	1.94328	2	A		548	IGSF9b	2.42347	6.93575	3	B		884	TEN2	-4.33796	1.32691	1	B
256	NLGN2	0.231541	9.21219	3	A		549	IGSF9b	1.92221	7.79892	3	B		885	TEN2	-5.61643	-3.2188	1	B
257	NLGN2	4.23294	-0.954779	2	A		550	IGSF9b	3.94009	-0.0791648	2	B		886	TEN2	0.965832	0.142587	2	B
258	NLGN2	3.96878	-6.0173	2	B		551	IGSF9b	2.97999	3.35451	3	B		887	TEN2	2.75463	-5.45784	2	B
259	NLGN2	4.40462	-4.33536	2	A		552	IGSF9b	2.97826	3.9322	3	B		888	TEN2	3.44808	-3.076	2	B
260	NLGN2	4.3615	-1.06762	2	B		553	IGSF9b	3.06181	3.75986	3	B		889	TEN2	-3.07883	1.21857	1	B
261	NLGN2	2.75726	6.987	3	A		554	IGSF9b	2.99679	4.08691	3	B		890	TEN2	-3.73995	3.27194	1	B
262	NLGN2	3.759	1.91593	2	A		555	IGSF9b	2.71984	5.29075	3	B		891	TEN2	3.209	-5.07953	2	B
263	NLGN2	3.93738	2.23323	2	B		556	IGSF9b	3.90864	-2.05205	2	B		892	TEN2	1.14288	4.88639	3	B
264	NLGN2	4.44556	-4.24681	2	B		557	IGSF9b	4.05551	-2.38764	2	A		893	TEN2	-0.717634	-5.18445	2	B
265	NLGN2	4.14263	1.79037	2	B		558	IGSF9b	3.85258	-4.56804	2	B		894	TEN2	0.0952113	-3.55163	2	B
266	NLGN2	4.49998	-1.14048	2	B		559	IGSF9b	3.854	-5.31383	2	A		895	TEN2	4.60922	-1.63821	2	B
267	NLGN2	2.83675	7.11822	3	B		560	IGSF9b	3.60178	1.52953	2	B		896	TEN2	0.188982	9.24873	3	B
268	NLGN2	3.75758	3.86859	3	B		561	IGSF9b	1.87267	7.88936	3	B		897	TEN2	3.66507	1.39404	2	B
269	NLGN2	3.92255	2.42899	2	B		562	IGSF9b	3.85077	-4.68637	2	A		898	TEN2	1.15935	3.70677	3	B
270	NLGN2	4.48216	0.276857	2	A		563	IGSF9b	1.71214	8.34345	3	B		899	TEN2	-4.50588	-0.203489	1	B
271	NLGN2	2.87035	7.18521	3	A		564	IGSF9b	4.04861	-2.62569	2	B		900	TEN2	1.39837	0.203587	2	B
272	NLGN2	2.0664	8.12316	3	A		565	IGSF9b	3.15437	4.20605	3	B		901	TEN2	1.59405	-0.360504	2	B
273	NLGN2	4.51245	-0.374197	2	B		566	IGSF9b	3.78667	-4.82431	2	B		902	TEN2	1.75996	2.96243	3	B
274	NLGN2	4.20143	-6.07589	2	A		567	IGSF9b	3.20644	3.7943	3	B		903	TEN2	3.29906	-2.34171	2	B
275	NLGN2	4.46498	-4.20687	2	B		568	IGSF9b	3.73909	-6.90224	2	A		904	TEN2	-0.164398	-3.70274	2	B
276	NLGN2	4.47863	-4.18451	2	B		569	IGSF9b	3.13375	4.39214	3	A		905	TEN2	3.2094	3.93045	3	B
277	NLGN2	4.20169	1.76951	2	B		570	IGSF9b	2.49067	6.99786	3	B		906	TEN2	3.66906	1.24764	2	B
278	NLGN2	4.3781	-4.87991	2	B		571	IGSF9b	4.08016	-0.271206	2	B		907	TEN2	3.99664	2.23376	2	B
279	NLGN2	4.51221	-1.80407	2	B		572	IGSF9b	3.6325	1.38676	2	B		908	TEN2	3.18002	4.83344	3	B
280	NLGN2	4.18469	1.67862	2	B		573	IGSF9b	4.13275	-0.332067	2	B		909	TEN2	0.171819	9.32028	3	B
281	NLGN2	1.36186	9.07966	3	B		574	IGSF9b	4.03909	-3.29724	2	B		910	TEN2	1.43147	9.05788	3	B
282	NLGN2	4.17025	1.79199	2	A		575	IGSF9b	4.06998	-2.90459	2	B		911	TEN2	1.61555	-0.374208	2	B
283	NLGN2	3.75499	3.99208	3	A		576	IGSF9b	3.75224	1.98688	2	B		912	TEN2	0.356426	8.75504	3	B
284	NLGN2	4.01344	-6.57087	2	B		577	IGSF9b	1.88808	7.89368	3	B		913	TEN2	0.516869	-1.71294	2	B
285	NLGN2	3.60802	4.22771	3	A		578	IGSF9b	1.33071	8.86861	3	A		914	TEN2	3.80549	-5.57226	2	B
286	NLGN2	4.56727	-1.6399	2	A		579	IGSF9b	1.40045	8.94957	3	A		915	TEN2	2.27979	2.86797	3	B
287	NLGN2	2.85803	7.01561	3	B		580	IGSF9b	2.62341	7.13588	3	B		916	TEN2	4.37988	0.0857351	2	B
288	NLGN2	4.53414	-4.14871	2	B		581	IGSF9b	1.32741	8.87837	3	A		917	TEN2	2.67515	-5.55007	2	B
289	NLGN2	4.29752	-6.08043	2	B		582	IGSF9b	3.33969	4.15227	3	B		918	TEN2	2.27328	7.24164	3	B
290	NLGN2	4.43593	0.508806	2	A		583	IGSF9b	2.67565	7.15728	3	B		919	TEN2	3.74324	2.57841	2	B
291	NLGN2	4.2963	-6.08393	2	B		584	IGSF9b	4.20025	-2.24634	2	B		920	TEN2	-2.75211	-3.05959	1	B
292	NLGN2	4.30101	-6.07627	2	B		585	IGSF9b	3.77753	2.45595	2	B		921	TEN2	2.97249	-1.17497	2	B
293	NLGN2	4.50232	-0.106614	2	B		586	IGSF9b	3.7689	-6.94991	2	B		922	TEN2	3.79159	3.89991	3	B
							587	IGSF9b	1.43815	8.93292	3	B		923	TEN2	3.79499	-6.95652	2	B
							588	IGSF9b	1.95641	7.87146	3	B		924	TEN2	0.963397	4.66205	3	B
							589	IGSF9b	4.31932	-1.22666	2	B		925	TEN2	-2.67723	0.157363	1	B
							590	IGSF9b	3.89385	-6.74523	2	B		926	TEN2	4.05707	-0.203598	2	B
							591	IGSF9b	1.8167	8.23948	3	A		927	TEN2	1.95373	7.60158	3	B
							592	IGSF9b	3.78821	-6.93118	2	B		928	TEN2	4.53432	-1.67215	2	B
							593	IGSF9b	3.84596	1.85625	2	B		929	TEN2	4.58161	-0.231293	2	B
							594	IGSF9b	3.54041	3.97282	3	B		930	TEN2	2.38996	0.117052	2	B
							595	IGSF9b	3.89501	-6.66268	2	B		931	TEN2	-2.01007	1.51728	1	B
							596	IGSF9b	1.41576	8.92511	3	B		932	TEN2	2.7254	7.36453	3	B
							597	IGSF9b	4.09951	-5.51777	2	B		933	TEN2	3.45025	-4.90365	2	B
							598	IGSF9b	3.53112	4.01539	3	B		934	TEN2	3.83576	-5.2025	2	B
							599	IGSF9b	4.34887	-4.05376	2	B		935	TEN2	2.83594	-2.00804	2	B
							600	IGSF9b	3.79806	-6.94391	2	B		936	TEN2	4.15432	-2.37005	2	B
							601	IGSF9b	4.40763	-4.00408	2	B		937	TEN2	2.08848	-2.62925	2	B
							602	IGSF9b	3.00877	5.1101	3	B		938	TEN2	2.92936	7.24982	3	B
							603	IGSF9b	3.86801	-6.85691	2	B		939	TEN2	4.2285	-0.162809	2	B
							604	IGSF9b	4.37061	-1.43773	2	B		940	TEN2	4.16228	-0.19813	2	B
							605	IGSF9b	2.79193	7.18424	3	B
							606	IGSF9b	2.70408	7.1505	3	B
							607	IGSF9b	4.50832	-1.81259	2	B
							608	IGSF9b	4.35292	-4.9642	2	B
							609	IGSF9b	1.41107	8.98311	3	B
							610	IGSF9b	2.84484	7.15375	3	B
							611	IGSF9b	4.48354	0.1337	2	B
							612	IGSF9b	4.50393	-0.135209	2	B
							613	IGSF9b	1.43417	8.98043	3	B
							614	IGSF9b	4.31534	-5.15964	2	B
							615	IGSF9b	4.48986	-1.99727	2	B
							616	IGSF9b	4.50501	-1.62085	2	B
							617	IGSF9b	4.46332	-2.01741	2	A
							618	IGSF9b	4.06298	1.63795	2	B
							619	IGSF9b	4.47585	-4.16742	2	B
							620	IGSF9b	3.77918	3.79416	3	B
							621	IGSF9b	3.77552	-6.9563	2	B
							622	IGSF9b	2.90545	7.20592	3	B
							623	IGSF9b	3.97118	-6.66134	2	B
							624	IGSF9b	1.49502	8.92404	3	A
							625	IGSF9b	2.738	7.3245	3	B
							626	IGSF9b	4.17972	1.76191	2	B
							627	IGSF9b	4.29851	-6.05281	2	A
							628	IGSF9b	4.25393	-6.13233	2	B
							629	IGSF9b	4.22831	1.78698	2	B
