# Supplementary material for: Interaction between Teneurin-2 and microtubules via EB proteins provides a platform for GABAA receptor exocytosis
Source: eLife journal article supplement (doi:10.7554/elife.83276), 2023-06-05
Supplement: fig2-data1 [file 2H.xlsx]

## Sheet: Fig.1J
Cluster analysis and the relationship between the positivity and negativity of each adhesion molecule.
Marker	A: positive B: negative	cluster							Marker	A: positive B: negative	cluster							Marker	A: positive B: negative	cluster
NLGN2	A	1							IGSF9b	A	1							TEN2	B	3
NLGN2	A	1			cluster 1	cluster 2&3	total		IGSF9b	A	1			cluster 1	cluster 2&3	total		TEN2	B	3			cluster 1	cluster 2&3	total
NLGN2	A	1		(A)NLGN2+	100	128	228		IGSF9b	B	1		(A)IGSF9b+	21	32	53		TEN2	B	3		(A)TEN2+	27	22	49
NLGN2	B	1		(B)NLGN2-	8	57	65		IGSF9b	A	1		(B)IGSF9b-	88	195	283		TEN2	B	3		(B)TEN2-	71	191	262
NLGN2	A	1		total	108	185	293		IGSF9b	A	1		total	109	227	336		TEN2	B	3		total	98	213	311
NLGN2	A	1		Odds ratio	5.56641				IGSF9b	B	1		Odds ratio	1.45419				TEN2	B	3		Odds ratio	3.30154
NLGN2	B	1							IGSF9b	B	1							TEN2	A	1
NLGN2	A	1		Upper 95% CI	12.2023				IGSF9b	A	1		Upper 95% CI	2.66368				TEN2	B	3		Upper 95% CI	6.17052
NLGN2	A	1		Lower 95% CI	2.53927				IGSF9b	B	1		Lower 95% CI	0.793891				TEN2	B	3		Lower 95% CI	1.76649
NLGN2	A	1							IGSF9b	B	1							TEN2	B	3
NLGN2	A	1			cluster 3	cluster 1&2	total		IGSF9b	B	1			cluster 3	cluster 1&2	total		TEN2	B	3			cluster 3	cluster 1&2	total
NLGN2	A	1		(A)NLGN2+	38	190	228		IGSF9b	B	1		(A)IGSF9b+	17	36	53		TEN2	B	3		(A)IGSF9b+	2	47	49
NLGN2	A	1		(B)NLGN2-	21	44	65		IGSF9b	A	1		(B)IGSF9b-	80	203	283		TEN2	A	3		(B)IGSF9b-	54	208	262
NLGN2	A	1		total	59	234	293		IGSF9b	B	1		total	97	239	336		TEN2	B	3		total	56	255	311
NLGN2	A	1		Odds ratio	0.419048				IGSF9b	B	1		Odds ratio	1.19826				TEN2	B	1		Odds ratio	0.163909
NLGN2	A	1							IGSF9b	A	1							TEN2	B	3
NLGN2	A	1		Upper 95% CI	0.824864				IGSF9b	B	1		Upper 95% CI	2.09448				TEN2	B	1		Upper 95% CI	0.681091
NLGN2	A	1		Lower 95% CI	0.212885				IGSF9b	B	1		Lower 95% CI	0.685534				TEN2	B	3		Lower 95% CI	0.0394456
NLGN2	A	1							IGSF9b	B	1							TEN2	A	1
NLGN2	B	1							IGSF9b	B	1							TEN2	A	1
NLGN2	A	1							IGSF9b	A	1							TEN2	A	3
NLGN2	B	1							IGSF9b	B	1							TEN2	B	3
NLGN2	A	1							IGSF9b	B	1							TEN2	B	3
NLGN2	A	1							IGSF9b	B	1							TEN2	B	1
NLGN2	A	1							IGSF9b	B	1							TEN2	B	3
NLGN2	A	1							IGSF9b	A	1							TEN2	B	1
NLGN2	A	1							IGSF9b	B	1							TEN2	B	3
NLGN2	A	1							IGSF9b	A	1							TEN2	B	3
NLGN2	B	1							IGSF9b	B	1							TEN2	B	3
NLGN2	A	1							IGSF9b	B	1							TEN2	B	3
NLGN2	A	1							IGSF9b	B	1							TEN2	B	3
NLGN2	A	1							IGSF9b	B	1							TEN2	B	1
NLGN2	A	1							IGSF9b	B	1							TEN2	B	3
NLGN2	A	1							IGSF9b	B	1							TEN2	B	1
NLGN2	A	1							IGSF9b	B	1							TEN2	B	3
NLGN2	A	1							IGSF9b	B	1							TEN2	B	3
NLGN2	A	1							IGSF9b	B	1							TEN2	B	1
NLGN2	A	1							IGSF9b	B	1							TEN2	B	1
NLGN2	A	1							IGSF9b	B	1							TEN2	B	1
NLGN2	A	1							IGSF9b	B	1							TEN2	B	3
NLGN2	A	1							IGSF9b	B	1							TEN2	B	3
NLGN2	A	1							IGSF9b	B	1							TEN2	B	3
NLGN2	A	1							IGSF9b	B	1							TEN2	B	3
NLGN2	A	1							IGSF9b	B	1							TEN2	B	1
NLGN2	A	1							IGSF9b	B	1							TEN2	B	3
NLGN2	A	1							IGSF9b	B	1							TEN2	B	3
NLGN2	A	1							IGSF9b	B	1							TEN2	B	3
NLGN2	A	1							IGSF9b	B	1							TEN2	B	3
NLGN2	A	1							IGSF9b	B	1							TEN2	B	1
NLGN2	A	1							IGSF9b	A	1							TEN2	B	1
NLGN2	A	1							IGSF9b	A	1							TEN2	B	1
NLGN2	A	1							IGSF9b	B	1							TEN2	B	3
NLGN2	A	1							IGSF9b	B	1							TEN2	B	1
NLGN2	A	1							IGSF9b	A	1							TEN2	A	1
NLGN2	A	1							IGSF9b	B	1							TEN2	A	1
NLGN2	A	1							IGSF9b	B	1							TEN2	A	1
NLGN2	B	1							IGSF9b	B	1							TEN2	B	2
NLGN2	A	1							IGSF9b	B	1							TEN2	B	1
NLGN2	A	1							IGSF9b	B	1							TEN2	B	3
NLGN2	A	1							IGSF9b	B	1							TEN2	B	3
NLGN2	B	1							IGSF9b	B	1							TEN2	B	2
NLGN2	A	1							IGSF9b	B	1							TEN2	B	1
NLGN2	A	1							IGSF9b	B	1							TEN2	B	2
NLGN2	A	1							IGSF9b	B	1							TEN2	B	1
NLGN2	A	1							IGSF9b	B	1							TEN2	B	1
NLGN2	A	1							IGSF9b	B	1							TEN2	B	1
NLGN2	A	1							IGSF9b	B	1							TEN2	B	1
NLGN2	A	1							IGSF9b	B	1							TEN2	B	2
NLGN2	A	1							IGSF9b	B	1							TEN2	B	2
NLGN2	A	1							IGSF9b	A	1							TEN2	B	1
NLGN2	A	1							IGSF9b	B	1							TEN2	A	1
NLGN2	A	1							IGSF9b	B	1							TEN2	B	2
NLGN2	A	1							IGSF9b	B	1							TEN2	B	2
NLGN2	A	1							IGSF9b	B	1							TEN2	B	1
NLGN2	A	1							IGSF9b	B	1							TEN2	B	2
NLGN2	A	1							IGSF9b	B	1							TEN2	B	2
NLGN2	A	1							IGSF9b	B	1							TEN2	B	2
NLGN2	A	1							IGSF9b	B	1							TEN2	B	1
NLGN2	A	1							IGSF9b	B	1							TEN2	B	2
NLGN2	A	1							IGSF9b	B	1							TEN2	B	2
NLGN2	A	1							IGSF9b	B	1							TEN2	B	2
NLGN2	A	1							IGSF9b	B	1							TEN2	B	2
NLGN2	A	1							IGSF9b	B	1							TEN2	B	2
NLGN2	A	1							IGSF9b	B	1							TEN2	B	2
NLGN2	A	1							IGSF9b	B	1							TEN2	A	2
NLGN2	A	1							IGSF9b	B	1							TEN2	B	1
NLGN2	A	1							IGSF9b	B	1							TEN2	B	2
NLGN2	A	1							IGSF9b	B	1							TEN2	B	2
NLGN2	A	1							IGSF9b	A	1							TEN2	B	2
NLGN2	A	1							IGSF9b	B	1							TEN2	B	2
NLGN2	A	1							IGSF9b	A	1							TEN2	A	2
NLGN2	A	1							IGSF9b	A	1							TEN2	B	2
NLGN2	A	1							IGSF9b	B	1							TEN2	B	2
NLGN2	A	1							IGSF9b	B	2							TEN2	B	2
NLGN2	A	1							IGSF9b	B	2							TEN2	B	2
NLGN2	A	1							IGSF9b	B	1							TEN2	B	2
NLGN2	A	2							IGSF9b	A	1							TEN2	B	2
NLGN2	A	1							IGSF9b	B	2							TEN2	B	2
NLGN2	A	1							IGSF9b	B	1							TEN2	A	1
NLGN2	A	1							IGSF9b	B	2							TEN2	A	2
NLGN2	A	1							IGSF9b	B	2							TEN2	B	1
NLGN2	A	1							IGSF9b	B	1							TEN2	B	1
NLGN2	A	1							IGSF9b	B	2							TEN2	A	2
NLGN2	A	1							IGSF9b	B	1							TEN2	B	2
NLGN2	A	1							IGSF9b	B	1							TEN2	B	2
NLGN2	B	2							IGSF9b	A	1							TEN2	B	1
NLGN2	A	3							IGSF9b	B	1							TEN2	B	1
NLGN2	A	2							IGSF9b	A	1							TEN2	B	2
NLGN2	A	2							IGSF9b	B	2							TEN2	B	1
NLGN2	A	2							IGSF9b	B	2							TEN2	B	1
NLGN2	A	2							IGSF9b	B	2							TEN2	B	2
NLGN2	A	2							IGSF9b	B	2							TEN2	B	1
NLGN2	A	2							IGSF9b	B	1							TEN2	B	2
NLGN2	A	1							IGSF9b	B	2							TEN2	B	2
NLGN2	B	2							IGSF9b	B	2							TEN2	B	2
NLGN2	A	1							IGSF9b	B	2							TEN2	B	2
NLGN2	A	2							IGSF9b	B	1							TEN2	B	2
NLGN2	A	1							IGSF9b	A	2							TEN2	A	1
NLGN2	B	1							IGSF9b	A	1							TEN2	B	2
NLGN2	B	2							IGSF9b	B	2							TEN2	B	2
NLGN2	A	2							IGSF9b	A	2							TEN2	B	2
NLGN2	A	2							IGSF9b	A	2							TEN2	B	2
NLGN2	A	2							IGSF9b	B	1							TEN2	B	2
NLGN2	A	2							IGSF9b	B	2							TEN2	A	1
NLGN2	A	2							IGSF9b	B	2							TEN2	B	2
NLGN2	A	3							IGSF9b	A	2							TEN2	B	2
NLGN2	A	3							IGSF9b	B	1							TEN2	B	2
NLGN2	A	2							IGSF9b	B	2							TEN2	A	2
NLGN2	A	2							IGSF9b	B	2							TEN2	B	1
NLGN2	A	2							IGSF9b	B	1							TEN2	B	1
NLGN2	B	2							IGSF9b	A	2							TEN2	B	2
NLGN2	A	2							IGSF9b	B	2							TEN2	A	2
NLGN2	A	2							IGSF9b	B	2							TEN2	A	1
NLGN2	A	2							IGSF9b	B	2							TEN2	B	1
NLGN2	A	2							IGSF9b	B	2							TEN2	B	2
NLGN2	B	2							IGSF9b	B	2							TEN2	B	2
NLGN2	A	2							IGSF9b	B	2							TEN2	A	2
NLGN2	B	3							IGSF9b	B	2							TEN2	B	2
NLGN2	A	2							IGSF9b	B	2							TEN2	A	2
NLGN2	A	2							IGSF9b	B	1							TEN2	B	1
NLGN2	A	2							IGSF9b	B	2							TEN2	B	2
NLGN2	A	3							IGSF9b	B	2							TEN2	A	1
NLGN2	A	2							IGSF9b	B	2							TEN2	A	1
NLGN2	A	2							IGSF9b	B	2							TEN2	B	2
NLGN2	A	3							IGSF9b	A	3							TEN2	B	2
NLGN2	A	2							IGSF9b	B	3							TEN2	B	2
NLGN2	A	2							IGSF9b	B	3							TEN2	B	1
NLGN2	A	2							IGSF9b	A	3							TEN2	B	2
NLGN2	A	2							IGSF9b	A	2							TEN2	B	2
NLGN2	B	3							IGSF9b	B	2							TEN2	B	1
NLGN2	A	2							IGSF9b	B	2							TEN2	B	2
NLGN2	A	2							IGSF9b	B	2							TEN2	B	2
NLGN2	A	3							IGSF9b	B	2							TEN2	B	1
NLGN2	A	2							IGSF9b	B	2							TEN2	B	2
NLGN2	B	2							IGSF9b	B	3							TEN2	B	2
NLGN2	A	3							IGSF9b	B	2							TEN2	B	2
NLGN2	B	3							IGSF9b	B	3							TEN2	B	1
NLGN2	A	2							IGSF9b	B	2							TEN2	A	1
NLGN2	B	3							IGSF9b	B	2							TEN2	B	2
NLGN2	A	2							IGSF9b	A	2							TEN2	B	2
NLGN2	B	3							IGSF9b	B	2							TEN2	B	2
NLGN2	A	2							IGSF9b	B	2							TEN2	B	2
NLGN2	A	2							IGSF9b	A	3							TEN2	B	2
NLGN2	A	2							IGSF9b	A	3							TEN2	A	1
NLGN2	A	2							IGSF9b	B	2							TEN2	A	2
NLGN2	A	2							IGSF9b	B	2							TEN2	B	2
NLGN2	A	2							IGSF9b	B	3							TEN2	B	2
NLGN2	A	2							IGSF9b	B	2							TEN2	B	2
NLGN2	A	2							IGSF9b	B	3							TEN2	B	2
NLGN2	A	2							IGSF9b	B	2							TEN2	A	1
NLGN2	A	2							IGSF9b	B	2							TEN2	B	2
NLGN2	A	3							IGSF9b	B	3							TEN2	B	1
NLGN2	A	2							IGSF9b	A	3							TEN2	B	1
NLGN2	B	3							IGSF9b	B	3							TEN2	B	2
NLGN2	A	2							IGSF9b	B	2							TEN2	B	2
NLGN2	A	3							IGSF9b	B	3							TEN2	B	2
NLGN2	B	3							IGSF9b	B	2							TEN2	B	1
NLGN2	A	2							IGSF9b	A	3							TEN2	B	1
NLGN2	A	3							IGSF9b	B	3							TEN2	B	2
NLGN2	A	2							IGSF9b	A	3							TEN2	B	2
NLGN2	A	3							IGSF9b	B	3							TEN2	B	2
NLGN2	B	3							IGSF9b	B	3							TEN2	B	2
NLGN2	A	2							IGSF9b	B	2							TEN2	B	2
NLGN2	A	2							IGSF9b	B	2							TEN2	A	1
NLGN2	A	2							IGSF9b	B	3							TEN2	B	2
NLGN2	A	2							IGSF9b	B	3							TEN2	B	2
NLGN2	A	2							IGSF9b	B	3							TEN2	B	2
NLGN2	A	2							IGSF9b	B	2							TEN2	B	2
NLGN2	A	2							IGSF9b	B	3							TEN2	B	1
NLGN2	B	3							IGSF9b	B	3							TEN2	B	2
NLGN2	A	3							IGSF9b	B	3							TEN2	B	2
NLGN2	A	3							IGSF9b	B	3							TEN2	B	2
NLGN2	A	3							IGSF9b	B	3							TEN2	A	1
NLGN2	A	3							IGSF9b	A	3							TEN2	B	2
NLGN2	A	3							IGSF9b	B	3							TEN2	B	1
NLGN2	A	2							IGSF9b	B	2							TEN2	B	2
NLGN2	A	3							IGSF9b	B	3							TEN2	B	2
NLGN2	B	2							IGSF9b	B	3							TEN2	B	2
NLGN2	A	2							IGSF9b	B	3							TEN2	A	2
NLGN2	A	2							IGSF9b	B	3							TEN2	A	2
NLGN2	A	3							IGSF9b	A	3							TEN2	A	2
NLGN2	B	3							IGSF9b	B	3							TEN2	B	2
NLGN2	B	2							IGSF9b	B	2							TEN2	B	2
NLGN2	A	2							IGSF9b	B	3							TEN2	B	2
NLGN2	B	2							IGSF9b	B	3							TEN2	A	2
NLGN2	A	3							IGSF9b	B	2							TEN2	A	2
NLGN2	A	3							IGSF9b	A	3							TEN2	B	2
NLGN2	A	2							IGSF9b	A	3							TEN2	A	2
NLGN2	A	2							IGSF9b	B	3							TEN2	B	2
NLGN2	A	3							IGSF9b	B	2							TEN2	B	2
NLGN2	A	3							IGSF9b	B	2							TEN2	B	2
NLGN2	B	2							IGSF9b	B	2							TEN2	B	2
NLGN2	A	2							IGSF9b	B	2							TEN2	B	2
NLGN2	A	3							IGSF9b	B	3							TEN2	A	1
NLGN2	A	2							IGSF9b	B	3							TEN2	A	1
NLGN2	A	3							IGSF9b	B	2							TEN2	A	1
NLGN2	A	2							IGSF9b	B	3							TEN2	A	2
NLGN2	B	3							IGSF9b	A	2							TEN2	A	2
NLGN2	B	2							IGSF9b	B	2							TEN2	A	2
NLGN2	A	2							IGSF9b	B	2							TEN2	A	1
NLGN2	A	3							IGSF9b	B	3							TEN2	A	1
NLGN2	B	3							IGSF9b	B	2							TEN2	A	2
NLGN2	A	3							IGSF9b	B	2							TEN2	A	1
NLGN2	A	2							IGSF9b	B	2							TEN2	A	2
NLGN2	B	3							IGSF9b	B	2							TEN2	A	1
NLGN2	A	2							IGSF9b	B	3							TEN2	A	1
NLGN2	A	3							IGSF9b	B	3							TEN2	A	1
NLGN2	B	2							IGSF9b	B	3							TEN2	B	3
NLGN2	A	3							IGSF9b	B	2							TEN2	B	1
NLGN2	B	3							IGSF9b	B	2							TEN2	B	2
NLGN2	A	2							IGSF9b	B	3							TEN2	B	1
NLGN2	A	2							IGSF9b	B	3							TEN2	B	1
NLGN2	B	3							IGSF9b	B	3							TEN2	B	3
NLGN2	A	3							IGSF9b	B	2							TEN2	B	1
NLGN2	A	2							IGSF9b	B	3							TEN2	B	1
NLGN2	B	2							IGSF9b	B	3							TEN2	B	1
NLGN2	A	2							IGSF9b	B	3							TEN2	B	2
NLGN2	A	3							IGSF9b	B	2							TEN2	B	1
NLGN2	A	2							IGSF9b	B	3							TEN2	B	1
NLGN2	A	3							IGSF9b	B	3							TEN2	B	2
NLGN2	A	2							IGSF9b	B	2							TEN2	B	1
NLGN2	B	3							IGSF9b	B	3							TEN2	B	1
NLGN2	A	2							IGSF9b	B	2							TEN2	B	1
NLGN2	A	2							IGSF9b	B	2							TEN2	B	2
NLGN2	B	2							IGSF9b	B	3							TEN2	B	2
NLGN2	A	2							IGSF9b	B	3							TEN2	B	1
NLGN2	B	3							IGSF9b	B	3							TEN2	B	1
NLGN2	B	2							IGSF9b	B	2							TEN2	B	2
NLGN2	A	2							IGSF9b	B	2							TEN2	B	1
NLGN2	A	2							IGSF9b	B	3							TEN2	B	2
NLGN2	A	2							IGSF9b	A	2							TEN2	B	1
NLGN2	B	2							IGSF9b	B	2							TEN2	B	1
NLGN2	A	2							IGSF9b	B	2							TEN2	B	1
NLGN2	A	3							IGSF9b	B	3							TEN2	B	1
NLGN2	A	2							IGSF9b	B	3							TEN2	B	1
NLGN2	A	3							IGSF9b	B	3							TEN2	B	1
NLGN2	A	2							IGSF9b	B	2							TEN2	B	2
NLGN2	B	2							IGSF9b	B	3							TEN2	B	2
NLGN2	A	2							IGSF9b	B	3							TEN2	B	2
NLGN2	B	2							IGSF9b	B	3							TEN2	B	1
NLGN2	A	3							IGSF9b	B	3							TEN2	B	1
NLGN2	A	2							IGSF9b	B	3							TEN2	B	2
NLGN2	B	2							IGSF9b	B	2							TEN2	B	3
NLGN2	B	2							IGSF9b	A	2							TEN2	B	2
NLGN2	B	2							IGSF9b	B	2							TEN2	B	2
NLGN2	B	2							IGSF9b	A	2							TEN2	B	2
NLGN2	B	3							IGSF9b	B	2							TEN2	B	3
NLGN2	B	3							IGSF9b	B	3							TEN2	B	2
NLGN2	B	2							IGSF9b	A	2							TEN2	B	3
NLGN2	A	2							IGSF9b	B	3							TEN2	B	1
NLGN2	A	3							IGSF9b	B	2							TEN2	B	2
NLGN2	A	3							IGSF9b	B	3							TEN2	B	2
NLGN2	B	2							IGSF9b	B	2							TEN2	B	3
NLGN2	A	2							IGSF9b	B	3							TEN2	B	2
NLGN2	B	2							IGSF9b	A	2							TEN2	B	2
NLGN2	B	2							IGSF9b	A	3							TEN2	B	3
NLGN2	B	2							IGSF9b	B	3							TEN2	B	2
NLGN2	B	2							IGSF9b	B	2							TEN2	B	2
NLGN2	B	2							IGSF9b	B	2							TEN2	B	3
NLGN2	B	2							IGSF9b	B	2							TEN2	B	3
NLGN2	B	3							IGSF9b	B	2							TEN2	B	3
NLGN2	A	2							IGSF9b	B	2							TEN2	B	2
NLGN2	A	3							IGSF9b	B	2							TEN2	B	3
NLGN2	B	2							IGSF9b	B	3							TEN2	B	2
NLGN2	A	3							IGSF9b	A	3							TEN2	B	2
NLGN2	A	2							IGSF9b	A	3							TEN2	B	3
NLGN2	B	3							IGSF9b	B	3							TEN2	B	2
NLGN2	B	2							IGSF9b	A	3							TEN2	B	2
NLGN2	B	2							IGSF9b	B	3							TEN2	B	3
NLGN2	A	2							IGSF9b	B	3							TEN2	B	2
NLGN2	B	2							IGSF9b	B	2							TEN2	B	1
NLGN2	B	2							IGSF9b	B	2							TEN2	B	2
NLGN2	B	2							IGSF9b	B	2							TEN2	B	3
									IGSF9b	B	3							TEN2	B	2
									IGSF9b	B	3							TEN2	B	3
									IGSF9b	B	2							TEN2	B	1
									IGSF9b	B	2							TEN2	B	2
									IGSF9b	A	3							TEN2	B	3
									IGSF9b	B	2							TEN2	B	2
									IGSF9b	B	2							TEN2	B	2
									IGSF9b	B	3							TEN2	B	2
									IGSF9b	B	2							TEN2	B	1
									IGSF9b	B	3							TEN2	B	3
									IGSF9b	B	2							TEN2	B	2
									IGSF9b	B	3							TEN2	B	2
									IGSF9b	B	2							TEN2	B	2
									IGSF9b	B	2							TEN2	B	2
									IGSF9b	B	2							TEN2	B	2
									IGSF9b	B	3							TEN2	B	3
									IGSF9b	B	2							TEN2	B	2
									IGSF9b	B	2							TEN2	B	2
									IGSF9b	B	3
									IGSF9b	B	3
									IGSF9b	B	2
									IGSF9b	B	2
									IGSF9b	B	3
									IGSF9b	B	3
									IGSF9b	B	2
									IGSF9b	B	2
									IGSF9b	B	3
									IGSF9b	B	2
									IGSF9b	B	2
									IGSF9b	B	2
									IGSF9b	A	2
									IGSF9b	B	2
									IGSF9b	B	2
									IGSF9b	B	3
									IGSF9b	B	2
									IGSF9b	B	3
									IGSF9b	B	2
									IGSF9b	A	3
									IGSF9b	B	3
									IGSF9b	B	2
									IGSF9b	A	2
									IGSF9b	B	2
									IGSF9b	B	2
