# Supplementary material for: Interaction between Teneurin-2 and microtubules via EB proteins provides a platform for GABAA receptor exocytosis
Source: eLife journal article supplement (doi:10.7554/elife.83276), 2023-06-05
Supplement: fig2-figsupp1-data1 [file S2B.xlsx]

## Sheet: Sheet1
Clasical comparative quantification of MAP2 intensity without reflecting cluster analysis.
MAP2	NLGN2 A: positive B: negative									MAP2	IGSF9b A: positive B: negative									MAP2 (AU)	TEN2 A: positive B: negative
6.2288	A									1.76079	A									2.86849	A
5.07691	A		Welch Two Sample t-test							1.20151	A		Welch Two Sample t-test							1.80305	A		Welch Two Sample t-test
4.81009	A									2.51842	A									5.42556	A
4.57487	B		data: MAP2 by NLGN2							1.61381	A		data: MAP2 by IGSF9b							4.90345	A		data: MAP2 by TEN2
4.20808	A		t = 5.3917, df = 109.13, p-value = 4.077e-07							0.479711	A		t = 1.9263, df = 62.102, p-value = 0.05865							3.69819	A		t = 3.5925, df = 62.12, p-value = 0.0006476
3.97005	A		alternative hypothesis: true difference in means between group A and group B is not equal to 0							0.454495	A		alternative hypothesis: true difference in means between group A and group B is not equal to 0							0.565071	A		alternative hypothesis: true difference in means between group A and group B is not equal to 0
3.8648	B		95 percent confidence interval:							0.852732	A		95 percent confidence interval:							1.57277	A		95 percent confidence interval:
3.77793	A		0.4666826 1.0091984							0.455854	A		-0.01457657 0.78797472							3.19769	A		0.2961807 1.0391743
3.77793	A		sample estimates:							0.0986366	A		sample estimates:							1.41795	A		sample estimates:
3.67677	A		mean in group A mean in group B							4.75607	A		mean in group A mean in group B							0.792873	A		mean in group A mean in group B
3.56655	A		1.5637069 0.8257664							1.13311	A		1.725702 1.339003							2.21674	A		1.962481 1.294803
3.48228	A									0.392233	A									1.46011	A
3.47267	A									0.852592	A									2.38571	A
3.35165	A									1.03683	A									2.11595	A
3.30401	A									0.770111	A									2.26064	A
3.25331	A									0.542266	A									0.908571	A
3.25002	A									1.63362	A									1.91891	A
3.24375	A									1.67021	A									0.867411	A
3.24269	A									0.892145	A									0.90279	A
3.15885	B									2.5414	A									0.444126	A
3.13004	A									1.90819	A									0.396015	A
3.12821	B									1.33785	A									0.792939	A
3.05829	A									3.08853	A									2.85532	A
3.02533	A									5.46301	A									1.93499	A
3.01737	A									0.384788	A									1.71501	A
2.99982	A									0.405681	A									1.90497	A
2.98953	A									3.23172	A									0.31117	A
2.94156	A									1.06934	A									0.675848	A
2.8788	B									3.04856	A									2.81128	A
2.82883	A									5.86804	A									1.02724	A
2.81648	A									0.476725	A									2.50383	A
2.72322	A									3.82494	A									0.70762	A
2.71415	A									0.218075	A									2.04048	A
2.71237	A									1.54473	A									0.980345	A
2.6803	A									0.865123	A									1.71644	A
2.65436	A									1.79751	A									1.71644	A
2.57723	A									1.2837	A									1.99026	A
2.57235	A									4.6833	A									1.61042	A
2.56464	A									1.88511	A									1.8865	A
2.48098	A									1.74831	A									2.8761	A
2.4804	A									0.491144	A									1.14275	A
2.45672	A									1.13455	A									2.86645	A
2.45427	A									0.330588	A									0.520583	A
2.43804	A									2.24155	A									4.62955	A
2.41751	A									3.40547	A									2.20425	A
2.39569	A									1.28439	A									1.17859	A
2.34372	A									1.48492	A									2.18647	A
2.32561	A									2.54521	A									2.28354	A
2.31374	A									0.99136	A									4.97011	A
2.30216	A									0.0741493	A									0.641785	B
2.2945	A									1.86469	A									0.331399	B
2.28806	A									1.66123	A									3.05654	B
2.28554	A									4.16317	A									0.721723	B
2.28446	A									1.51056	B									1.09839	B
2.28278	A									0.514337	B									0.828819	B
2.2129	A									2.67688	B									1.56596	B
2.17626	B									0.33992	B									1.13902	B
2.17266	A									3.25463	B									2.3995	B
2.16931	A									1.84609	B									2.19353	B
2.16678	A									0.570947	B									1.38795	B
2.15653	B									1.97644	B									3.05799	B
2.1441	A									0.412714	B									1.46911	B
2.14051	A									1.2638	B									2.84745	B
2.13141	A									0.25113	B									1.14389	B
2.12639	A									2.22586	B									2.94521	B
2.09859	A									0.949501	B									1.90072	B
2.09766	A									2.21808	B									0.704819	B
2.09531	A									1.14749	B									5.149	B
2.09469	A									0.885066	B									1.88636	B
2.05506	A									0.318764	B									1.55842	B
2.0411	A									2.33517	B									1.79839	B
2.03567	A									1.40914	B									0.584591	B
2.03202	A									2.84802	B									0.823893	B
2.02654	A									0.682157	B									5.2811	B
2.02254	A									1.76025	B									4.23507	B
2.02187	A									0.348587	B									1.0179	B
2.01298	A									2.44074	B									1.77111	B
2.00711	A									2.53042	B									2.05447	B
1.9945	A									0.573056	B									2.80667	B
1.99447	A									0.188179	B									0.661204	B
1.98438	A									0.295062	B									0.923246	B
1.97719	A									0.769283	B									2.32586	B
1.9543	A									4.46447	B									0.526072	B
1.94291	A									2.66689	B									0.124187	B
1.92081	A									2.29496	B									2.18127	B
1.91262	A									2.19999	B									4.57094	B
1.90948	A									0.477729	B									2.89186	B
1.87774	A									1.17248	B									1.02678	B
1.87646	A									2.18794	B									4.20508	B
1.87215	A									3.03917	B									2.23196	B
1.86089	A									0.749536	B									1.73529	B
1.85862	A									0.316821	B									3.60295	B
1.84216	A									0.832907	B									0.559439	B
1.83521	A									1.21303	B									0.55487	B
1.82652	A									2.74546	B									1.42562	B
1.8149	A									1.2967	B									1.34015	B
1.80696	A									1.04425	B									3.54014	B
1.80596	A									1.94772	B									1.21449	B
1.78174	A									0.523444	B									2.34036	B
1.78086	A									1.91759	B									0.720649	B
1.74214	A									0.649464	B									1.23011	B
1.7211	A									0.554765	B									3.31478	B
1.70356	A									2.32454	B									0.00849228	B
1.67084	A									3.23324	B									1.78138	B
1.64645	A									0.244047	B									0.486806	B
1.64246	B									0.888204	B									4.10782	B
1.62479	A									0.606294	B									1.19869	B
1.6128	A									1.76293	B									2.12759	B
1.61254	A									1.05458	B									2.21643	B
1.6103	A									1.20323	B									2.21162	B
1.60553	A									1.00996	B									2.41047	B
1.59617	A									3.36896	B									0.435431	B
1.59579	A									0.8986	B									0.696046	B
1.56111	A									0.310799	B									5.04684	B
1.53094	B									2.45593	B									2.86327	B
1.53048	A									2.47603	B									1.12792	B
1.51479	A									1.77961	B									0.38498	B
1.50176	A									0.500964	B									2.13853	B
1.50032	B									1.8123	B									0.775838	B
1.49353	B									0.859438	B									2.34785	B
1.49263	A									0.592605	B									2.78828	B
1.49237	A									1.81339	B									0.89605	B
1.47301	A									0.924315	B									4.46621	B
1.42475	A									1.59362	B									2.79164	B
1.42175	A									1.06183	B									2.7532	B
1.40318	A									0.520644	B									2.82909	B
1.37029	A									2.75762	B									0.543421	B
1.36711	A									1.43235	B									0.273236	B
1.33232	A									1.43235	B									1.98066	B
1.33122	A									0.325381	B									2.94338	B
1.31498	B									2.61211	B									3.20963	B
1.31482	A									0.167867	B									0.984062	B
1.31088	A									2.70552	B									2.16285	B
1.29709	A									1.7114	B									1.75434	B
1.29435	A									0.323611	B									3.17992	B
1.29399	B									1.35759	B									2.69272	B
1.29357	A									1.56113	B									3.41146	B
1.29155	B									3.90311	B									0.366706	B
1.27325	A									2.04534	B									1.23318	B
1.25878	A									0.864269	B									1.27373	B
1.25539	A									0.384155	B									3.49123	B
1.24668	A									2.01467	B									0.935593	B
1.24586	A									3.17104	B									0.666769	B
1.24417	A									0.0822152	B									1.27806	B
1.23911	A									0.522879	B									3.561	B
1.23731	A									1.68032	B									1.03594	B
1.22324	A									1.90381	B									0.944136	B
1.21661	A									0.338212	B									1.62275	B
1.21497	A									0.882959	B									2.94778	B
1.20471	B									0.248738	B									1.88708	B
1.20459	A									0.515303	B									2.22109	B
1.2031	A									0.379403	B									3.27013	B
1.16718	A									4.02199	B									1.59148	B
1.16495	A									4.64266	B									1.85373	B
1.15026	B									0.687109	B									2.40587	B
1.14521	A									1.11618	B									0.812883	B
1.13911	B									1.56902	B									1.20747	B
1.12438	A									0.858333	B									3.18538	B
1.12438	B									3.09969	B									0.51472	B
1.11884	A									3.41647	B									0.962156	B
1.10385	B									1.99571	B									3.51353	B
1.09242	A									0.424849	B									1.37903	B
1.0732	A									1.37959	B									0.774837	B
1.07073	A									0.907099	B									1.08351	B
1.0615	A									0.837675	B									1.60029	B
1.05636	A									1.46481	B									0.348014	B
1.04962	A									1.48965	B									0.99822	B
1.04614	A									0.827257	B									0.626469	B
1.03653	A									1.53981	B									1.57619	B
1.02576	A									1.44282	B									0.919274	B
0.992066	A									0.522253	B									0.490058	B
0.984862	A									0.78245	B									0.829212	B
0.978974	A									0.204592	B									0.593473	B
0.974272	B									0.523103	B									2.29408	B
0.96225	A									2.29987	B									1.36795	B
0.960285	A									0.91122	B									1.45919	B
0.951988	B									1.08968	B									3.01503	B
0.949724	A									3.26933	B									1.09067	B
0.936066	A									0.442805	B									0.506381	B
0.912176	A									2.69093	B									2.68996	B
0.906862	A									0.897261	B									0.536848	B
0.906757	B									2.05357	B									0.285216	B
0.905665	A									0.888354	B									0.886968	B
0.898892	A									0.899185	B									0.737283	B
0.868157	A									1.1202	B									0.878808	B
0.865921	A									1.2527	B									0.390812	B
0.856927	A									1.71545	B									1.92385	B
0.855583	A									0.868214	B									1.17001	B
0.855019	A									0.0495523	B									1.3433	B
0.839088	B									2.64824	B									0.720966	B
0.811348	A									0.604669	B									1.28606	B
0.810971	A									0.286455	B									1.14709	B
0.807405	A									2.54095	B									0.84435	B
0.796437	A									1.73763	B									1.23551	B
0.794262	A									2.22003	B									1.20438	B
0.794005	A									0.207792	B									1.6164	B
0.771977	A									1.11112	B									1.30138	B
0.742496	B									0.0935984	B									0.718404	B
0.729339	A									2.95725	B									0.879283	B
0.718945	A									3.98523	B									0.765078	B
0.711711	A									1.7952	B									0.65264	B
0.692231	B									2.61875	B									0.773169	B
0.689923	B									2.30965	B									0.100817	B
0.672165	A									1.08804	B									0.296258	B
0.666629	B									0.536961	B									1.33171	B
0.662562	A									2.02683	B									0.946624	B
0.653929	A									2.16708	B									0.62868	B
0.626851	A									0.227995	B									0.435187	B
0.626763	A									0.200512	B									0.935618	B
0.604976	A									0.370683	B									0.427216	B
0.599136	A									1.2462	B									1.33957	B
0.588949	B									0.633905	B									0.468823	B
0.585113	A									0.990289	B									0.923698	B
0.584058	A									1.65528	B									0.470805	B
0.577647	A									0.299481	B									1.20399	B
0.561319	A									0.274135	B									1.09741	B
0.548883	A									1.78464	B									0.570827	B
0.548759	B									0.6876	B									1.36307	B
0.536184	B									1.21214	B									0.256359	B
0.52446	A									2.63504	B									0.460665	B
0.521673	A									2.29455	B									0.926665	B
0.512712	B									0.764945	B									0.466993	B
0.490835	A									1.53661	B									2.61944	B
0.489396	A									0.853248	B									1.31381	B
0.478404	B									2.81724	B									1.2223	B
0.465496	A									2.27493	B									0.52342	B
0.460624	A									0.406791	B									1.34523	B
0.458069	B									1.76862	B									2.72732	B
0.453903	A									0.268659	B									0.382183	B
0.45113	B									2.40589	B									0.883237	B
0.440405	A									0.364348	B									1.05165	B
0.440082	A									1.8092	B									1.0497	B
0.43623	B									0.960636	B									1.06115	B
0.417549	A									0.337841	B									0.645118	B
0.412278	A									2.89487	B									0.361813	B
0.390713	B									0.643004	B									0.443124	B
0.388931	A									5.37206	B									1.12139	B
0.380231	A									1.72463	B									0.588733	B
0.379904	A									0.799716	B									0.858223	B
0.371832	A									1.20775	B									1.0109	B
0.35235	A									0.297353	B									0.253004	B
0.349177	B									1.08026	B									0.179514	B
0.341634	A									1.2076	B									0.186698	B
0.325986	A									1.74139	B									2.24608	B
0.325866	B									1.71749	B									0.86333	B
0.325447	A									3.19187	B									1.29391	B
0.325342	B									0.696029	B									0.437631	B
0.318302	B									2.55494	B									0.438667	B
0.312898	A									1.33574	B									1.33555	B
0.310449	A									2.01052	B									0.158647	B
0.302291	A									0.323625	B									0.250416	B
0.302023	B									2.8006	B									0.215172	B
0.295497	A									1.40887	B									0.585034	B
0.291828	A									0.643848	B									0.0261288	B
0.281137	A									0.981038	B									1.02701	B
0.27765	A									1.10505	B									0.175661	B
0.277597	A									0.463369	B									0.576937	B
0.268372	B									1.42757	B									1.08832	B
0.26777	A									2.00239	B									0.478985	B
0.266207	B									1.70416	B									1.25246	B
0.249807	A									2.77598	B									0.656894	B
0.228893	A									0.463968	B									0.294445	B
0.216522	B									2.3495	B									0.701941	B
0.213543	B									0.45593	B									0.416361	B
0.212026	B									0.578836	B									0.445429	B
0.207957	B									0.386251	B									0.526505	B
0.206516	B									0.306164	B									0.417446	B
0.1964	B									3.84713	B									0.781733	B
0.192235	B									0.792034	B									0.333297	B
0.186875	A									2.69527	B									0.258309	B
0.173862	A									1.47064	B									0.194549	B
0.171274	A									1.38375	B									0.904566	B
0.165498	B									1.78151	B									1.09541	B
0.164975	A									0.809397	B									1.09541	B
0.161266	B									0.823228	B									0.487913	B
0.160074	B									0.267917	B									0.564364	B
0.149798	B									0.588011	B									0.399057	B
0.145515	B									0.251088	B									1.92358	B
0.137704	B									0.470673	B									0.666357	B
0.128478	B									2.40547	B									0.22336	B
0.121636	B									0.438305	B									0.93111	B
0.120531	A									1.125	B									0.386045	B
0.0861957	A									0.451635	B									0.752758	B
0.0812912	B									2.62413	B									0.233601	B
0.0599952	A									1.78311	B									0.0518215	B
0.052534	A									1.76105	B									0.30251	B
0.0496752	B									0.471993	B									1.23837	B
0.0490992	B									2.27709	B									1.35735	B
0.0489546	B									0.234717	B									1.82805	B
0.0459386	A									1.3579	B									0.493311	B
0.0338082	B									0.707224	B									0.562679	B
0.0272654	B									0.478732	B									0.599675	B
0.0213505	B									0.581536	B									0.823216	B
										3.05409	B									0.202371	B
										0.775581	B									0.0855554	B
										0.620229	B									0.768953	B
										0.514584	B									0.829848	B
										2.74271	B									1.69145	B
										0.596349	B									0.250617	B
										2.29723	B									0.572955	B
										0.100598	B									0.275073	B
										3.13884	B									0.468708	B
										1.06087	B									0.797343	B
										0.255809	B									0.417644	B
										1.69478	B									0.96868	B
										2.16022	B									0.264857	B
										1.26368	B									0.182757	B
										0.447237	B									0.393098	B
										1.21633	B									0.0167632	B
										0.920169	B									0.389592	B
										1.46844	B									0.389592	B
										0.558908	B
										0.482915	B
										0.964395	B
										0.663612	B
										0.510564	B
										3.60016	B
										0.989054	B
										0.310446	B
										0.445533	B
										0.593707	B
										0.766267	B
										0.334033	B
										0.654616	B
										0.241434	B
										0.651568	B
										0.612625	B
										0.866242	B
										0.259813	B
										0.554399	B
										0.639029	B
										0.525353	B
										1.95019	B
										0.858469	B
										0.311066	B
										0.0593801	B
