# Supplementary material for: Interaction between Teneurin-2 and microtubules via EB proteins provides a platform for GABAA receptor exocytosis
Source: eLife journal article supplement (doi:10.7554/elife.83276), 2023-06-05
Supplement: fig3-data1 [file 3D.xlsx]

## Sheet: Figure 3D
Mander's coefficient values between whole TEN2 and surface TEN2 measurements
	DIV12			DIV15
	M1	M2		M1	M2
	0.889	0.649		0.928	0.725
	0.895	0.673		0.934	0.733
	0.844	0.589		0.934	0.695
	0.837	0.609		0.907	0.605
	0.748	0.499		0.941	0.674
	0.857	0.605		0.931	0.645
	0.825	0.568		0.947	0.694
	0.809	0.555		0.868	0.549
	0.809	0.543		0.879	0.586
	0.816	0.56		0.88	0.556
	0.791	0.564		0.917	0.642
	0.817	0.56		0.914	0.582
	0.814	0.574
	0.844	0.631
	0.819	0.579
Mean	0.8276	0.583867	Mean	0.915	0.6405
SD	0.0365314	0.0440176	SD	0.0263646	0.0645537
