# Supplementary material for: Interaction between Teneurin-2 and microtubules via EB proteins provides a platform for GABAA receptor exocytosis
Source: eLife journal article supplement (doi:10.7554/elife.83276), 2023-06-05
Supplement: fig3-data1 [file 3F.xlsx]

## Sheet: Sheet1
Signal intensity of TEN2 and gephyrin.
Distance (µm)	TEN2 (AU)	gephyrin (AU)
0	0	119
0.004	0	139.108
0.008	0	154.292
0.012	0	173.668
0.016	0	194.75
0.02	0	228.591
0.024	0	274.773
0.028	0	332.893
0.032	0	408.666
0.036	0	495.504
0.04	0	592.802
0.044	0	675.567
0.048	0	762.629
0.052	0	853.287
0.056	0	960.919
0.06	0	1083.89
0.064	3.18648	1246.87
0.068	10.6798	1430.79
0.072	17.1508	1623.8
0.076	25.56	1832.33
0.08	32.7949	2041.2
0.084	40.2201	2396.68
0.088	39.6549	2814.57
0.092	38.4025	3408.82
0.096	28.9155	4214.24
0.1	19.1459	5394.98
0.104	8.18772	6810.8
0.108	9.03546	8145.56
0.112	17.8437	8824.68
0.116	37.9807	8707.03
0.12	73.5887	8187.17
0.124	130.041	8394.92
0.128	212.756	10196.2
0.132	314.662	12665.2
0.136	461.932	13594.6
0.14	646.618	13198.4
0.144	911.974	11967.1
0.148	1386.92	10908.9
0.152	2041.49	9835.33
0.156	3070.99	9265.76
0.16	4372.06	8979.18
0.164	5676.62	8684.5
0.168	6776.91	8490.73
0.172	7491.5	8841.57
0.176	8061.02	9504.2
0.18	8671.89	9945.35
0.184	9423.5	9848.7
0.188	10302	9247.29
0.192	11068.5	9259.54
0.196	11607.7	9203.68
0.2	11976.8	8857.92
0.204	11991.7	8083.07
0.208	11625.7	7098.15
0.212	11019.7	6139.91
0.216	10412	5390.09
0.22	10117.4	5175.38
0.224	10520.9	5721.45
0.228	10594.6	6813
0.232	10584.3	8007.18
0.236	10206	8669.68
0.24	9722.86	8636.46
0.244	8611.06	8176.42
0.248	7487.9	7722.04
0.252	6937.8	7242.04
0.256	7768.69	6711.33
0.26	10363.3	5991.05
0.264	12947	5144.88
0.268	11884.8	4359.46
0.272	8587.75	3669.6
0.276	5479.87	3661.5
0.28	3887.13	3856.37
0.284	3456.68	3978.86
0.288	3412.88	3755.59
0.292	3555.75	3556.1
0.296	3376.75	3344.53
0.3	2718.44	3015.56
0.304	1952.97	2563
0.308	1560.88	2082.99
0.312	1650.37	1646.51
0.316	2116.42	1274.42
0.32	2928.89	997.605
0.324	3584.32	751.947
0.328	3810.06	579.18
0.332	3334.82	396.538
0.336	2342.25	254.136
0.34	1348.36	150.94
0.344	664.894	94.842
0.348	299.698	62.704
0.352	147.343	43.442
0.356	125.379	37.335
0.36	200.802	31.285
0.364	464.439	26.361
0.368	835.406	21.25
0.372	1337.26	16.665
0.376	1720.04	12.118
0.38	1816.65	8.667
0.384	1569.49	6
0.388	1115.94	3.579
0.392	668.202	2.941
0.396	346.063	2.645
0.4	174.154	2.905
0.404	106.351	4.579
0.408	118.262	6.717
0.412	164.687	8.933
0.416	415.144	11.684
0.42	932	15.316
0.424	1791.43	18.26
0.428	2613.58	20.932
0.432	2787.47	24.097
0.436	2175.61	26.235
0.44	1286.24	27.273
0.444	563.362	27.853
0.448	159.848	27.596
0.452	35.3395	26.455
0.456	4.26	25
