# Supplementary material for: Interaction between Teneurin-2 and microtubules via EB proteins provides a platform for GABAA receptor exocytosis
Source: eLife journal article supplement (doi:10.7554/elife.83276), 2023-06-05
Supplement: fig3-data1 [file 3G.xlsx]

## Sheet: Sheet1
Distance between the centers of mass of TEN2 and gephyrin.
index	protein	X (µm)	Y (µm)	Distance (µm)
1	gepyrin	0.345	0.718
	TEN2	0.429	0.728	0.0845931
2	gepyrin	1.58	0.608
	TEN2	1.488	0.659	0.10519
3	gepyrin	3.058	0.529
	TEN2	3.045	0.567	0.0401622
4	gepyrin	2.376	1.645
	TEN2	2.382	1.705	0.0602993
5	gepyrin	3.713	1.661
	TEN2	3.744	1.669	0.0320156
6	gepyrin	3.05	0.53
	TEN2	3.04	0.577	0.0480521
7	gepyrin	1.198	1.068
	TEN2	1.28	1.067	0.0820061
8	gepyrin	1.435	0.816
	TEN2	1.383	0.903	0.101356
9	gepyrin	2.544	1.968
	TEN2	2.55	2.027	0.0593043
10	gepyrin	1.526	0.966
	TEN2	1.528	0.992	0.0260768
11	gepyrin	1.601	1.76
	TEN2	1.566	1.883	0.127883
12	gepyrin	1.658	1.427
	TEN2	1.7	1.509	0.0921303
13	gepyrin	2.613	1.655
	TEN2	2.604	1.73	0.0755381
14	gepyrin	1.845	1.438
	TEN2	1.816	1.518	0.0850941
15	gepyrin	2.297	2.05
	TEN2	2.311	2.09	0.0423792
16	gepyrin	1.639	1.587
	TEN2	1.566	1.585	0.0730274
17	gepyrin	1.525	0.293
	TEN2	1.475	0.348	0.0743303
18	gepyrin	0.914	2.46
	TEN2	0.864	2.549	0.102083
19	gepyrin	1.433	1.231
	TEN2	1.41	1.29	0.0633246
20	gepyrin	1.313	1.237
	TEN2	1.275	1.361	0.129692
21	gepyrin	2.126	0.91
	TEN2	2.114	1.036	0.12657
22	gepyrin	0.686	1.271
	TEN2	0.676	1.376	0.105475
23	gepyrin	1.561	0.807
	TEN2	1.555	0.927	0.12015
24	gepyrin	2.447	0.821
	TEN2	2.388	0.819	0.0590339
25	gepyrin	1.336	1.764
	TEN2	1.418	1.742	0.0848999
26	gepyrin	2.266	1.65
	TEN2	2.254	1.807	0.157458
27	gepyrin	1.492	0.791
	TEN2	1.539	0.872	0.0936483
28	gepyrin	2.453	1.015
	TEN2	2.444	1.092	0.0775242
29	gepyrin	0.892	1.703
	TEN2	0.822	1.836	0.150296
30	gepyrin	1.69	1.34
	TEN2	1.726	1.424	0.0913893
31	gepyrin	2.192	0.778
	TEN2	2.204	0.9	0.122589
32	gepyrin	0.779	1.3
	TEN2	0.797	1.317	0.0247588
33	gepyrin	2.304	1.491
	TEN2	2.323	1.466	0.0314006
