# Supplementary material for: Interaction between Teneurin-2 and microtubules via EB proteins provides a platform for GABAA receptor exocytosis
Source: eLife journal article supplement (doi:10.7554/elife.83276), 2023-06-05
Supplement: fig3-data1 [file 3I.xlsx]

## Sheet: Sheet1
The number of proximity signals per 100 µm.
antibody	number (/100 µm)
normal IgG	0.62
normal IgG	0.29		Welch Two Sample t-test
normal IgG	0
normal IgG	0.13		data: number by antibody
normal IgG	0		t = -3.6795, df = 15.416, p-value = 0.002142
normal IgG	0.31		alternative hypothesis: true difference in means between group normal IgG and group TEN2 is not equal to 0
normal IgG	0.64		95 percent confidence interval:
normal IgG	0.35		-1.5962437 -0.4269944
normal IgG	0.64		sample estimates:
normal IgG	0.48		mean in group normal IgG mean in group TEN2
normal IgG	0.26		0.3657143 1.3773333
normal IgG	0.66
normal IgG	0.31
normal IgG	0.43
TEN2	0.68
TEN2	2.32
TEN2	1.88
TEN2	1.64
TEN2	0.73
TEN2	4.42
TEN2	0.6
TEN2	0.74
TEN2	1.17
TEN2	0.44
TEN2	0.67
TEN2	1.57
TEN2	0.94
TEN2	0.7
TEN2	2.16
