# Supplementary material for: Interaction between Teneurin-2 and microtubules via EB proteins provides a platform for GABAA receptor exocytosis
Source: eLife journal article supplement (doi:10.7554/elife.83276), 2023-06-05
Supplement: fig3-figsupp1-data2 [file S3G.xlsx]

## Sheet: Figure 3 supplemental figure 1G
The degree of overlap of double staining of anti-TEN2ICD and anti-HA
	tM1	tM2
	0.666	0.665
	0.678	0.718
	0.484	0.52
	0.518	0.483
	0.58	0.644
	0.539	0.581
	0.546	0.604
	0.485	0.579
	0.561	0.587
	0.515	0.581
	0.55	0.594
	0.599	0.597
	0.573	0.597
	0.401	0.378
	0.475	0.548
	0.431	0.519
	0.573	0.555
Mean	0.539647	0.573529
SD	0.0730804	0.0750992
