# Supplementary material for: Interaction between Teneurin-2 and microtubules via EB proteins provides a platform for GABAA receptor exocytosis
Source: eLife journal article supplement (doi:10.7554/elife.83276), 2023-06-05
Supplement: fig3-figsupp1-data2 [file S3H.xlsx]

## Sheet: Sheet1
No effect of HA knock-in on localization to inhibitory synapses.
antibody	ratio
HA	0.323944
HA	0.4		Welch Two Sample t-test
HA	0.251282
HA	0.552632		data: ratio by antibody
HA	0.138462		t = 0.86339, df = 11.337, p-value = 0.4058
HA	0.204225		alternative hypothesis: true difference in means between group HA and group ICD is not equal to 0
HA	0.474576		95 percent confidence interval:
HA	0.432432		-0.0777753 0.1787815
ICD	0.165644		sample estimates:
ICD	0.278075		mean in group HA mean in group ICD
ICD	0.351351		0.3471941 0.2966910
ICD	0.24
ICD	0.329114
ICD	0.432653
ICD	0.342995
ICD	0.233696
