# Supplementary material for: Interaction between Teneurin-2 and microtubules via EB proteins provides a platform for GABAA receptor exocytosis
Source: eLife journal article supplement (doi:10.7554/elife.83276), 2023-06-05
Supplement: fig3-figsupp1-data2 [file S3Q.xlsx]

## Sheet: Sheet1
HA signal intensity along the dendritic axis for knock-in and wild-type neurons
ten2+/+			ten23xHA/+
Distance (µｍ)	HA signal intensity		Distance (µｍ)	HA signal intensity
0	26486.5		0	24751.3
0.1318	21883.9		0.1318	26157.1
0.2636	14230.8		0.2636	21601.7
0.3954	9213.36		0.3954	21126.3
0.5272	3685.41		0.5272	22287.8
0.6589	4260.01		0.6589	24601.3
0.7907	2506.55		0.7907	25195.1
0.9225	7485.92		0.9225	18156.6
1.0543	10211.9		1.0543	17483.2
1.1861	9801.11		1.1861	16120.7
1.3179	10362.4		1.3179	18245.6
1.4497	12804.3		1.4497	14371.9
1.5815	9878.55		1.5815	12952.8
1.7132	10093.4		1.7132	15853.9
1.845	7175.71		1.845	12236.5
1.9768	5754.31		1.9768	15031.4
2.1086	4537.05		2.1086	14805.2
2.2404	4703.01		2.2404	22804.3
2.3722	3895.25		2.3722	28339.4
2.504	4813.66		2.504	24449
2.6358	6838.15		2.6358	23202.4
2.7676	10800.4		2.7676	19753.1
2.8993	9726.78		2.8993	15109.5
3.0311	6952.52		3.0311	15349.6
3.1629	4950.42		3.1629	15380.1
3.2947	3156.22		3.2947	10776.2
3.4265	5639.7		3.4265	13217.8
3.5583	3854.56		3.5583	13697.6
3.6901	5966.71		3.6901	14307.1
3.8219	5168.13		3.8219	16979.7
3.9536	7657.12		3.9536	15481.8
4.0854	5889.77		4.0854	14752.9
4.2172	2995.4		4.2172	17737.4
4.349	1911.27		4.349	20732.7
4.4808	2140.61		4.4808	21716.3
4.6126	2928.99		4.6126	25565.1
4.7444	6036.36		4.7444	25249.5
4.8762	4321.9		4.8762	18183.5
5.008	4135.92		5.008	18752
5.1397	3780.66		5.1397	19306.4
5.2715	2827.97		5.2715	16909
5.4033	1507.81		5.4033	13062
5.5351	1471.46		5.5351	12125.1
5.6669	2409.67		5.6669	8544.12
5.7987	3027.96		5.7987	7109.17
5.9305	2777.3		5.9305	7633.58
6.0623	5427.77		6.0623	9162.95
6.194	5018.43		6.194	8484.95
6.3258	2384.68		6.3258	8019.09
6.4576	2155.04		6.4576	7225.53
6.5894	2134.07		6.5894	6288.64
6.7212	3808.38		6.7212	7598.05
6.853	2755.33		6.853	6468.35
6.9848	2455.49		6.9848	8303.74
7.1166	2759.47		7.1166	11465.7
7.2484	3692.49		7.2484	14795.2
7.3801	3805.66		7.3801	15416.9
7.5119	7186.18		7.5119	15730.9
7.6437	9739.12		7.6437	17141.8
7.7755	10133.4		7.7755	13669.7
7.9073	8584.04		7.9073	12404.2
8.0391	6074.42		8.0391	14162
8.1709	3620.52		8.1709	14579.8
8.3027	3179.6		8.3027	19230.1
8.4344	2131.66		8.4344	25809.6
8.5662	3484		8.5662	28149.6
8.698	4948.47		8.698	25373.3
8.8298	7407.16		8.8298	20381
8.9616	6574.67		8.9616	14633.7
9.0934	5456.64		9.0934	12112.8
9.2252	6062.44		9.2252	9482.51
9.357	4734.88		9.357	9393.45
9.4888	4434.81		9.4888	9712.57
9.6205	6171.73		9.6205	11212.7
9.7523	5749.69		9.7523	11958.5
9.8841	4602.86		9.8841	11689.5
10.0159	4932.07		10.0159	12654.9
10.1477	3778.33		10.1477	12642.5
10.2795	5982.45		10.2795	11629
10.4113	10497.1		10.4113	13032.5
10.5431	12246.7		10.5431	16016.5
10.6748	9561.88		10.6748	17956.3
10.8066	10895.8		10.8066	22400.5
10.9384	8592.22		10.9384	23884.4
11.0702	7307.02		11.0702	25973.7
11.202	6873.47		11.202	26598.1
11.3338	8538.54		11.3338	26898.9
11.4656	8231.53		11.4656	24175.4
11.5974	7257.85		11.5974	21379.6
11.7292	4844.19		11.7292	24201.2
11.8609	2793.6		11.8609	24143.7
11.9927	2237.56		11.9927	20889.8
12.1245	5706.53		12.1245	18488.2
12.2563	6329.12		12.2563	22566.9
12.3881	5745.86		12.3881	24452.3
12.5199	4703.31		12.5199	23102.2
12.6517	5720.99		12.6517	22224.8
12.7835	5769.68		12.7835	19639.3
12.9152	3393.72		12.9152	19381.4
13.047	2627.95		13.047	20478
13.1788	2228.55		13.1788	19505.9
13.3106	1462.31		13.3106	24266.2
13.4424	1212.66		13.4424	22315.6
13.5742	1248.66		13.5742	18039.5
13.706	707.343		13.706	15980.1
13.8378	1052.35		13.8378	16441.8
13.9696	1270.43		13.9696	21556.4
14.1013	3914.83		14.1013	22923.5
14.2331	2663.22		14.2331	19008.1
14.3649	2294.69		14.3649	18320.5
14.4967	1582.98		14.4967	13671.1
14.6285	1811.57		14.6285	9353.75
14.7603	2200.42		14.7603	11391.7
14.8921	2813.42		14.8921	10312.9
15.0239	3124.72		15.0239	10369.1
15.1556	5067.76		15.1556	10831.7
15.2874	8266.07		15.2874	11522.2
15.4192	8512.71		15.4192	12861.9
15.551	5243.5		15.551	12466.3
15.6828	2370.43		15.6828	11793
15.8146	1252.4		15.8146	13126.7
15.9464	1322.27		15.9464	14656.8
16.0782	1817.84		16.0782	13112.5
16.21	1931.18		16.21	10629.3
16.3417	3769.41		16.3417	14880.3
16.4735	3576.9		16.4735	22081.6
16.6053	2235.94		16.6053	20993.4
16.7371	2552.46		16.7371	19805.2
16.8689	2486.61		16.8689	19735
17.0007	2544.54		17.0007	20712.7
17.1325	2613.04		17.1325	20895.4
17.2643	4145.95		17.2643	22845
17.396	3597.09		17.396	27625.2
17.5278	3266.89		17.5278	28039.6
17.6596	4648.89		17.6596	34783
17.7914	3612.33		17.7914	36353.4
17.9232	3776.88		17.9232	34084.3
18.055	2462.82		18.055	27565
18.1868	3408.43		18.1868	26841.7
18.3186	2073.24		18.3186	25721.6
18.4504	3208.04		18.4504	22197.1
18.5821	2774.23		18.5821	18247.6
18.7139	2994.51		18.7139	20066.6
18.8457	3840.17		18.8457	19820.1
18.9775	5668.75		18.9775	23637.2
19.1093	4631.33		19.1093	19295.3
19.2411	2126.55		19.2411	13239.7
19.3729	1342.7		19.3729	9074.8
19.5047	2166.16		19.5047	12891.4
19.6364	2033.9		19.6364	14424.3
19.7682	3099.52		19.7682	14861.3
19.9	4856.7		19.9	14109.6
20.0318	4474.47		20.0318	12315.6
20.1636	4270.98		20.1636	12175.7
20.2954	5162.12		20.2954	10815.9
20.4272	9522.09		20.4272	10859.5
20.559	9967.44		20.559	14589.3
20.6908	8911.85		20.6908	19917.8
20.8225	10573.5		20.8225	18999.4
20.9543	7781.83		20.9543	19758.9
21.0861	7854.88		21.0861	16470.9
21.2179	4739.34		21.2179	23746.8
21.3497	8052.47		21.3497	27972.4
21.4815	4837.89		21.4815	27557.1
21.6133	3529.07		21.6133	28082
21.7451	1256.66		21.7451	26463.2
21.8768	1694.3		21.8768	19446.4
22.0086	1054.24		22.0086	20326.6
22.1404	1241.62		22.1404	16922.7
22.2722	1424.89		22.2722	15680.7
22.404	1343.36		22.404	16331
22.5358	1409.55		22.5358	16354.3
22.6676	1080.76		22.6676	13604.9
22.7994	1579.7		22.7994	10853.3
22.9312	1475.48		22.9312	12084.9
23.0629	2588.48		23.0629	14412.3
23.1947	1334.03		23.1947	14463.3
23.3265	1332.92		23.3265	13664.4
23.4583	1139.27		23.4583	15593.6
23.5901	725.743		23.5901	17607.5
23.7219	280.557		23.7219	16123
23.8537	1103.34		23.8537	14100.6
23.9855	2571.27		23.9855	9255.58
24.1172	2243.56		24.1172	11803.3
24.249	3114.51		24.249	12990
24.3808	5234.66		24.3808	13050.1
24.5126	7985.61		24.5126	13438.8
24.6444	9706.09		24.6444	13522.8
24.7762	7225.65		24.7762	10074.4
24.908	6956.48		24.908	7243.86
25.0398	5258.31		25.0398	11882.1
25.1716	7551.98		25.1716	14238.3
25.3033	9246.45		25.3033	10993.2
25.4351	7119.99		25.4351	7966.29
25.5669	5728.7		25.5669	8998.33
25.6987	2704.03		25.6987	13035.4
25.8305	3854.92		25.8305	18481.5
25.9623	5558.93		25.9623	16255
26.0941	7786.91		26.0941	16800.8
26.2259	7374.01		26.2259	17800.4
26.3576	6177.63		26.3576	13213.5
26.4894	5165.91		26.4894	12098.6
26.6212	3946.12		26.6212	13625.9
26.753	2641.32		26.753	16099.4
26.8848	2478.17		26.8848	15655.6
27.0166	1174.12		27.0166	14965.3
27.1484	1420.93		27.1484	9555.98
27.2802	2202.43		27.2802	12803.6
27.412	2241.1		27.412	16887.4
27.5437	3195.58		27.5437	20115.5
27.6755	2094.64		27.6755	19981
27.8073	2172.64		27.8073	19976.8
27.9391	1438.88		27.9391	16308.2
28.0709	5032.1		28.0709	15188.5
28.2027	4519.32		28.2027	17292.2
28.3345	2175.22		28.3345	20997.8
28.4663	1122.15		28.4663	22974.8
28.598	1486.92		28.598	22660.5
28.7298	1332.79		28.7298	22547.7
28.8616	3815.63		28.8616	23052.3
28.9934	2699.62		28.9934	18669.9
29.1252	3173.79		29.1252	15286
29.257	5793.28		29.257	11748.7
29.3888	11731.8		29.3888	14490.2
29.5206	15555.9		29.5206	22439.9
29.6524	14072.5		29.6524	23676.2
29.7841	11920.8		29.7841	22758.2
29.9159	7731.36		29.9159	20043.7
30.0477	5504.51		30.0477	20297.4
30.1795	7209.4		30.1795	19649.1
30.3113	8180.9		30.3113	20397.7
30.4431	5725.14		30.4431	24665
30.5749	5275.95		30.5749	23290.1
