# Supplementary material for: Interaction between Teneurin-2 and microtubules via EB proteins provides a platform for GABAA receptor exocytosis
Source: eLife journal article supplement (doi:10.7554/elife.83276), 2023-06-05
Supplement: fig4-data1 [file 4D.xlsx]

## Sheet: Figure 4D
The relationship between TEN2 fluorescence intensity in the cell bodies and the density of gephyrin puncta per 100 μm dendrite
transfection	TEN2	Density
shTenm2	1.67952	10.95		Welch Two Sample t-test
shTenm2	2.62189	15.7
shTenm2	2.20538	11.65		data: data$TEN2 by data$transfection
shTenm2	3.17741	12.73		t = 7.6977, df = 22.401, p-value = 9.854e-08
shTenm2	2.12487	19.52		alternative hypothesis: true difference in means between group control and group shTenm2 is not equal to 0
shTenm2	2.4658	9.9		95 percent confidence interval:
shTenm2	1.72111	11.98		2.181211 3.787646
shTenm2	1.89222	11.39		sample estimates:
shTenm2	0.507465	4.84		mean in group control mean in group shTenm2
shTenm2	2.28231	2.92		4.991840 2.007412
shTenm2	1.33019	10.77
shTenm2	2.46229	9.26		Welch Two Sample t-test
shTenm2	2.32537	10.42
shTenm2	1.72638	4.13		data: data$Density by data$transfection
shTenm2	1.58898	2.31		t = 2.9762, df = 29.016, p-value = 0.005833
control	3.42178	24.66		alternative hypothesis: true difference in means between group control and group shTenm2 is not equal to 0
control	7.93007	20.86		95 percent confidence interval:
control	6.43918	14.7		1.517486 8.184161
control	5.47454	7.79		sample estimates:
control	4.15623	12.61		mean in group control mean in group shTenm2
control	2.72765	11.4		14.74882 9.89800
control	4.47209	14.56
control	6.93335	15.06
control	3.47392	19.8
control	7.00446	13.69
control	3.81698	15.26
control	5.06602	10.59
control	4.12447	13.58
control	4.62685	11.02
control	5.88826	10.91
control	4.04608	21.22
control	5.25935	13.02
