# Supplementary material for: Interaction between Teneurin-2 and microtubules via EB proteins provides a platform for GABAA receptor exocytosis
Source: eLife journal article supplement (doi:10.7554/elife.83276), 2023-06-05
Supplement: fig4-data1 [file 4F.xlsx]

## Sheet: Sheet1
Relative fluorescence intensity of GABAA receptor subunits.
α1
transfection	intensity
cont	1.78772
cont	1.04447		Welch Two Sample t-test
cont	1.46455
cont	1.62468		data: intensity by transfection
cont	1.1112		t = 0.43554, df = 22.649, p-value = 0.6673
cont	0.603987		alternative hypothesis: true difference in means between group cont and group kd is not equal to 0
cont	0.886568		95 percent confidence interval:
cont	0.417075		-0.2612595 0.4004591
cont	0.847582		sample estimates:
cont	0.836669		mean in group cont mean in group kd
cont	0.498757		1.0000000 0.9304002
cont	0.87673
kd	1.0194
kd	0.996439
kd	0.849577
kd	1.5652
kd	0.974581
kd	1.05609
kd	1.54358
kd	0.663573
kd	0.849564
kd	0.400931
kd	0.35261
kd	0.383079
kd	1.1119
kd	1.58957
kd	0.910148
kd	0.620164
α5
transfection	intensity
cont	1.29167
cont	0.684405		Welch Two Sample t-test
cont	1.11796
cont	1.73361		data: intensity by transfection
cont	1.75073		t = 0.50128, df = 27.915, p-value = 0.6201
cont	1.68023		alternative hypothesis: true difference in means between group cont and group kd is not equal to 0
cont	0.662454		95 percent confidence interval:
cont	0.63926		-0.2607891 0.4297535
cont	0.652122		sample estimates:
cont	0.644923		mean in group cont mean in group kd
cont	0.800311		1.0000000 0.9155178
cont	0.65103
cont	0.646797
cont	1.04448
kd	2.07116
kd	1.21541
kd	1.71177
kd	0.932598
kd	0.732952
kd	1.45316
kd	1.12033
kd	0.5509
kd	0.47612
kd	0.404788
kd	0.552602
kd	0.821619
kd	0.745613
kd	0.729945
kd	0.602584
kd	0.52674
γ2
transfection	intensity
cont	0.921175
cont	1.25205		Welch Two Sample t-test
cont	1.07221
cont	1.91044		data: intensity by transfection
cont	1.05447		t = 2.3576, df = 23.096, p-value = 0.02723
cont	0.985231		alternative hypothesis: true difference in means between group cont and group kd is not equal to 0
cont	0.775343		95 percent confidence interval:
cont	0.641324		0.0308405 0.4715466
cont	1.1242		sample estimates:
cont	0.618701		mean in group cont mean in group kd
cont	0.831265		1.0000000 0.7488064
cont	0.761356
cont	0.890244
cont	1.16198
kd	0.539913
kd	0.741783
kd	0.756655
kd	0.404387
kd	0.60293
kd	1.10624
kd	0.842136
kd	0.995563
kd	0.647288
kd	0.608015
kd	0.765358
kd	1.14398
kd	0.580241
