# Supplementary material for: Interaction between Teneurin-2 and microtubules via EB proteins provides a platform for GABAA receptor exocytosis
Source: eLife journal article supplement (doi:10.7554/elife.83276), 2023-06-05
Supplement: fig4-data1 [file 4I.xlsx]

## Sheet: Figure 4I
puncta ID	2	3	5	8	1	2	3	5	6	7	8	9	10	1	2	3	4	5	6	9	12			puncta ID	1	4	6	7	9	10	4	11	12	7	8	10	11
time (min)	0	0	0	0	0	0	0	0	0	0	0	0	0	0	0	0	0	0	0	0	0	nega:AVE		time (min)	1	1	1	1	1	1	1	1	1	1	1	1	1	posi:AVE
0	0.0131547	0.0134372	0.00894024	0.0119267	0.0179481	0.0107899	0.0112732	0.011309	0.0118647	0.0204276	0.0227383	0.0183979	0.0220485	0.0263303	0.0214068	0.0195733	0.0205887	0.0456855	0.0179878	0.0266688	0.0236482	0.0188641		0	0.0172091	0.00949542	0.00741395	0.00874939	0.0140804	0.0134859	0.015317	0.0295525	0.018731	0.0224418	0.0205837	0.0253669	0.0324091	0.0180643
0.25	0.0172471	0.0153018	0.0113281	0.0140778	0.016005	0.0111351	0.0192757	0.0119883	0.0155403	0.0203861	0.0231156	0.0191806	0.0249915	0.0249064	0.0206957	0.0194236	0.0204275	0.0440397	0.0148154	0.0268758	0.023566	0.0197297		0.25	0.0193449	0.0158093	0.016948	0.0200604	0.0175506	0.0150052	0.00926217	0.0297439	0.0185732	0.0230084	0.020308	0.0254921	0.0327096	0.0202935
0.5	0.0137895	0.018984	0.0184967	0.0155467	0.0208881	0.0125891	0.0184948	0.0119026	0.0206361	0.0232047	0.0239805	0.0229038	0.0238299	0.0244021	0.0331546	0.0237262	0.0210482	0.029257	0.036938	0.0302041	0.0307691	0.0226069		0.5	0.0265018	0.018043	0.0160577	0.011689	0.013673	0.0184151	0.0221073	0.0285837	0.0205571	0.0192438	0.0221809	0.0197345	0.0265268	0.0202549
0.75	0.0199879	0.0230646	0.0202696	0.0152207	0.0110156	0.0147024	0.0157747	0.0267907	0.022486	0.0240406	0.0278094	0.0342074	0.0298861	0.0208807	0.033846	0.0280052	0.0239731	0.0298111	0.0180438	0.0213535	0.0241951	0.0231126		0.75	0.0210674	0.0182628	0.0171536	0.0103312	0.0167298	0.0160483	0.0283709	0.0355579	0.0262984	0.0219798	0.0207378	0.0279946	0.036661	0.022861
1	0.0232942	0.0245259	0.0170082	0.0216486	0.0147248	0.0182096	0.0206408	0.0236188	0.0227736	0.0240925	0.0230722	0.0235819	0.0228878	0.0298261	0.0364404	0.0213466	0.0180871	0.0260322	0.0434291	0.0281947	0.0409232	0.0249694		1	0.0235591	0.0231683	0.0152364	0.0104641	0.0197701	0.0275245	0.0255777	0.0345142	0.0220831	0.0251399	0.02524	0.0197431	0.041176	0.024092
1.25	0.0293114	0.0197358	0.019181	0.021662	0.0261365	0.0127122	0.0212663	0.0184622	0.0216851	0.028138	0.0243394	0.0271549	0.0228291	0.0173612	0.0361527	0.0214467	0.0175799	0.0243316	0.022205	0.0264036	0.0307186	0.0232768		1.25	0.0217272	0.0270271	0.0184498	0.0207893	0.0201467	0.0277534	0.0190546	0.0367244	0.022554	0.0250394	0.022385	0.0300133	0.0316154	0.0248677
1.5	0.0210249	0.0220046	0.0220406	0.0218667	0.0279202	0.0162861	0.0274216	0.0303853	0.0318712	0.0258313	0.0252779	0.0402271	0.0369549	0.0293728	0.0230969	0.0211308	0.0267932	0.0310437	0.0364901	0.0285215	0.0385113	0.027813		1.5	0.0225879	0.0282938	0.0193618	0.0186956	0.0173824	0.0240747	0.0294107	0.0359081	0.0260734	0.0269007	0.0273142	0.0219628	0.0366304	0.0257382
1.75	0.024691	0.0259607	0.020757	0.0204029	0.0238959	0.0165466	0.0277859	0.039968	0.0225155	0.0306293	0.0322676	0.0357408	0.0347115	0.0282463	0.0332664	0.0326383	0.0283116	0.0293394	0.0382417	0.0296357	0.0330822	0.0289826		1.75	0.0373827	0.0244464	0.0181938	0.0144764	0.0266908	0.0310679	0.0336714	0.0353738	0.0269642	0.0256486	0.0303836	0.0298047	0.0341828	0.0283298
2	0.0338738	0.0299674	0.0291767	0.0242008	0.0178861	0.0216476	0.0335465	0.0284895	0.0298673	0.030156	0.0282638	0.0276927	0.0381964	0.0257143	0.0379913	0.0215809	0.0247784	0.0428438	0.026961	0.0284705	0.0315278	0.0291825		2	0.0283937	0.031067	0.0232656	0.0214759	0.0252264	0.0283893	0.0327049	0.039463	0.0299663	0.0247771	0.0283186	0.0215955	0.0586349	0.0302522
2.25	0.0268077	0.0304517	0.0261183	0.0228339	0.0272486	0.01891	0.0266956	0.0296862	0.0291202	0.0356285	0.0290784	0.0435828	0.0148495	0.0221298	0.0328283	0.0271942	0.0319882	0.0359249	0.0460054	0.0298131	0.0305005	0.0293998		2.25	0.0265189	0.0289621	0.0263206	0.0237038	0.0241536	0.020197	0.0420838	0.0444846	0.0300978	0.0302815	0.0320322	0.0290693	0.041226	0.0307024
2.5	0.0302065	0.0286705	0.0217355	0.0261334	0.0235846	0.0206994	0.0326525	0.0394469	0.0198158	0.0343475	0.0298591	0.0327003	0.0391081	0.0301288	0.0488688	0.0287927	0.0262429	0.0561583	0.0274136	0.0319317	0.0346977	0.0315807		2.5	0.0396956	0.0210238	0.0300419	0.0246062	0.0286092	0.0274749	0.0463523	0.0499737	0.0334588	0.0265164	0.0332062	0.0407022	0.0406952	0.0340274
2.75	0.0290751	0.0321659	0.0311409	0.0238295	0.0198866	0.0200885	0.0399889	0.0490772	0.026604	0.0508249	0.0294672	0.0217322	0.0228885	0.0199401	0.0346215	0.0257604	0.0226733	0.042981	0.0184248	0.0255537	0.0289847	0.0293195		2.75	0.034314	0.0274116	0.0263519	0.024607	0.0242529	0.0269762	0.0224965	0.0450677	0.0262279	0.0263085	0.0294718	0.0285587	0.0407052	0.0294423
3	0.0270744	0.0341619	0.0438842	0.0249749	0.029525	0.0218122	0.0371504	0.037553	0.0343906	0.030474	0.029253	0.0343754	0.0464047	0.024158	0.0391491	0.0280654	0.0307681	0.0560729	0.0468671	0.0314831	0.0371494	0.0345118		3	0.0289678	0.0283333	0.0293082	0.0310022	0.0306873	0.0279212	0.0492204	0.0526712	0.0336928	0.0602287	0.0303567	0.0302161	0.0380917	0.0362075
3.25	0.0331239	0.0340621	0.0443804	0.0206854	0.0408936	0.025271	0.0349045	0.0290669	0.0359453	0.0347994	0.0296072	0.0464527	0.066498	0.0212949	0.0380663	0.0273748	0.0255452	0.0490271	0.0225959	0.0324055	0.0453146	0.0351102		3.25	0.0337583	0.02858	0.0268089	0.0314753	0.0254062	0.030488	0.0430441	0.046946	0.0295582	0.0278206	0.0815321	0.0333971	0.0426003	0.0370319
3.5	0.034427	0.0345397	0.0375253	0.0264207	0.0201093	0.0217205	0.039351	0.0418826	0.0353006	0.0350865	0.0332009	0.0385953	0.0174124	0.0312672	0.0397695	0.036848	0.0241855	0.0595713	0.0338349	0.0354946	0.0298536	0.0336379		3.5	0.0295312	0.0230973	0.0244989	0.0227289	0.0275753	0.031001	0.0470672	0.0513822	0.0321057	0.0276488	0.0919992	0.0306809	0.0488747	0.0375532
3.75	0.0353478	0.0390749	0.0348143	0.029596	0.0231067	0.0198657	0.0348791	0.0277647	0.0320718	0.0352988	0.0323927	0.0451609	0.0356052	0.0259777	0.0352473	0.0334667	0.03268	0.0429121	0.027313	0.0336675	0.0433783	0.0333153		3.75	0.0374503	0.0282196	0.0302509	0.0333654	0.0357466	0.0289315	0.0508719	0.0554826	0.0357982	0.0265541	0.0926139	0.0289045	0.0373374	0.0401175
4	0.033505	0.0427097	0.0330073	0.0307841	0.0410623	0.0286984	0.0516673	0.039331	0.0304199	0.0364018	0.0397879	0.0437537	0.0368747	0.0277731	0.041262	0.0310271	0.029893	0.070718	0.0164427	0.0443317	0.0417096	0.0376743		4	0.0296321	0.0286417	0.029015	0.0281142	0.0284179	0.0350845	0.0459111	0.057686	0.0398115	0.0335143	0.0873404	0.0286172	0.0354842	0.0390208
4.25	0.0326222	0.0408864	0.0251689	0.0370152	0.0308353	0.0249586	0.0450749	0.0519574	0.0268415	0.0369921	0.0339255	0.0422702	0.0336093	0.0266301	0.0376277	0.0366671	0.0306045	0.0796759	0.039488	0.0286844	0.0476089	0.0375783		4.25	0.0307897	0.0217576	0.0346439	0.0325873	0.0255207	0.0400106	0.0614469	0.0573302	0.0301673	0.0306914	0.0814494	0.0386089	0.0417925	0.0405228
4.5	0.0367968	0.0484664	0.0294578	0.0346979	0.0375983	0.0298097	0.0336864	0.0670446	0.0373207	0.0383924	0.034098	0.0377857	0.0191391	0.0298996	0.0283139	0.0339023	0.0299601	0.0405402	0.0395279	0.0380617	0.0428311	0.0365396		4.5	0.0347873	0.0290065	0.0287455	0.0217291	0.0410383	0.0310963	0.042509	0.0552814	0.0368849	0.0331003	0.0843133	0.0399703	0.0356194	0.0395447
4.75	0.0333591	0.0395108	0.0373887	0.0304679	0.03871	0.025389	0.040373	0.0431323	0.0319264	0.0364037	0.0341145	0.0415438	0.056178	0.0335623	0.041237	0.0258132	0.0375554	0.0354563	0.0275184	0.0384394	0.0403144	0.0365902		4.75	0.0461095	0.0280096	0.0334568	0.0390219	0.0277921	0.041922	0.0448396	0.0585236	0.0334748	0.0316077	0.0832981	0.0346165	0.037562	0.0415565
5	0.0337354	0.0399942	0.0346632	0.0370875	0.0395901	0.0294409	0.0372842	0.0364181	0.0330058	0.038649	0.0361216	0.0458799	0.0521744	0.0300545	0.0344679	0.0321249	0.0233897	0.0458878	0.0466432	0.0366115	0.0440781	0.0374906		5	0.0394609	0.0363301	0.0360838	0.0253478	0.0288645	0.0413464	0.0446499	0.061099	0.0337348	0.0282545	0.0907277	0.0397844	0.0371731	0.0417582
5.25	0.0347346	0.0435663	0.0289348	0.0341861	0.0391291	0.029239	0.0485657	0.0597346	0.0412993	0.0389203	0.0361237	0.0487305	0.0256826	0.0281427	0.045734	0.0315731	0.0364927	0.0527317	0.0318233	0.0332081	0.0383407	0.0384235		5.25	0.0454767	0.0245256	0.0348094	0.0350934	0.0352441	0.0352146	0.0822349	0.0600288	0.0335453	0.0320185	0.0818027	0.0332291	0.0411777	0.0441847
5.5	0.0372209	0.0462595	0.0361344	0.0365318	0.0475457	0.0293025	0.0524426	0.0619236	0.0278369	0.0364307	0.0336368	0.039972	0.0263145	0.0288617	0.0425679	0.0330212	0.0395911	0.0302051	0.0385808	0.0425002	0.0406103	0.0384519		5.5	0.0351385	0.0332347	0.0374752	0.0394305	0.0287819	0.0407497	0.0360304	0.0598194	0.0399588	0.0322218	0.0908652	0.0373677	0.0542798	0.0434887
5.75	0.0348182	0.0440147	0.0403525	0.0344681	0.0594185	0.026142	0.0499612	0.051195	0.0390824	0.0431872	0.0392418	0.0557729	0.0399867	0.0402865	0.0463441	0.0356203	0.0261842	0.0291374	0.0499086	0.0406539	0.0387845	0.0411696		5.75	0.0306755	0.0402256	0.0448906	0.0383968	0.0382861	0.0453097	0.0661999	0.0583041	0.0407618	0.0331098	0.0877191	0.0411617	0.0435498	0.0468146
6	0.0379509	0.0438521	0.0550686	0.0406961	0.0475757	0.0282615	0.0567458	0.0360338	0.0361871	0.0407146	0.0362302	0.076578	0.0289636	0.0362871	0.042216	0.041171	0.0370855	0.0357512	0.0349896	0.03797	0.0368673	0.041295		6	0.0400961	0.0356876	0.0390561	0.0337212	0.0376596	0.0468108	0.0490834	0.0658103	0.0373077	0.0373405	0.0655607	0.0488925	0.0544771	0.0455003
6.25	0.0387976	0.0457116	0.0360292	0.0387132	0.0437779	0.038376	0.0460375	0.0437542	0.0413915	0.0383219	0.0365087	0.0465275	0.103168	0.0506486	0.0420794	0.0365993	0.0357982	0.0567172	0.0475699	0.0382798	0.0462037	0.0452862		6.25	0.0453884	0.035437	0.0458566	0.0422073	0.0346145	0.0441579	0.0471125	0.0615576	0.0408882	0.0312429	0.039633	0.0343733	0.0346835	0.0413194
6.5	0.0424252	0.043975	0.0465474	0.0390375	0.0458548	0.0334072	0.0535209	0.0870514	0.0384354	0.0481296	0.0359689	0.0390578	0.0541312	0.0340561	0.0408258	0.0295845	0.0413647	0.0297721	0.0545623	0.0327989	0.0559247	0.0441158		6.5	0.0488953	0.0339656	0.0400142	0.0450818	0.0413231	0.0404064	0.0486483	0.0667011	0.0359039	0.0340271	0.0371321	0.0504593	0.0627214	0.0450215
6.75	0.0384045	0.0525911	0.0614754	0.045385	0.0400626	0.0325335	0.0636722	0.0749997	0.043247	0.0363408	0.0397379	0.0420294	0.0361877	0.0269277	0.0430456	0.0371176	0.0278767	0.0314305	0.0529267	0.0344166	0.0475939	0.0432382		6.75	0.0407362	0.0343603	0.0479879	0.0472518	0.0403144	0.042988	0.0448619	0.063573	0.0337176	0.0329367	0.0334736	0.0582735	0.0439434	0.0434168
7	0.040732	0.0562375	0.0374952	0.0410925	0.0412662	0.0356463	0.0611085	0.0696628	0.0488501	0.0398777	0.0386372	0.0275849	0.0365974	0.0434818	0.0425349	0.0355658	0.0419512	0.0314009	0.0409682	0.0374289	0.0422438	0.0423983		7	0.0443883	0.0320704	0.0446466	0.0383221	0.0496005	0.0486269	0.0509648	0.0635595	0.0400572	0.0331292	0.0375811	0.0380537	0.0518711	0.044067
7.25	0.0423954	0.0543829	0.0479915	0.0439882	0.041506	0.0348088	0.0557523	0.0672288	0.04818	0.0401795	0.0380821	0.0467186	0.0402072	0.0413349	0.0384053	0.0358828	0.043446	0.0578571	0.0832716	0.0437272	0.0494346	0.0473705		7.25	0.0432398	0.0438552	0.0388671	0.0411396	0.0454634	0.0484151	0.058651	0.06536	0.0403722	0.0364265	0.0353672	0.0374414	0.0465194	0.0447014
7.5	0.0416968	0.050136	0.0569661	0.0528877	0.052548	0.0480661	0.0529019	0.0612385	0.0432723	0.0418585	0.038311	0.0435118	0.0460999	0.0275423	0.0466135	0.0342359	0.0381976	0.0492332	0.0372059	0.0311189	0.0338254	0.0441651		7.5	0.0486159	0.0402036	0.0453047	0.0306551	0.0473119	0.0480481	0.0654752	0.0612526	0.0412779	0.0326997	0.0403696	0.0437171	0.0652779	0.0469392
7.75	0.0488662	0.060182	0.0550828	0.0552274	0.0482593	0.0512645	0.0696265	0.0842298	0.0460085	0.0392247	0.0374951	0.0346669	0.0382064	0.0368578	0.036157	0.0281423	0.0279476	0.0474934	0.0403287	0.0409019	0.0427628	0.0461396		7.75	0.042303	0.0248314	0.0510552	0.0273053	0.0409942	0.0613219	0.0565271	0.0673637	0.0400666	0.0360821	0.0409542	0.0401261	0.0748282	0.046443
8	0.0453193	0.0594323	0.0467804	0.0592043	0.0373066	0.0497812	0.0546625	0.0775738	0.0586907	0.049975	0.0369204	0.0385063	0.0579375	0.036164	0.0426338	0.0412027	0.0287577	0.0530808	0.0585183	0.0408143	0.0505897	0.0487548		8	0.0467123	0.0335624	0.0450552	0.033095	0.0466384	0.056724	0.0651052	0.0664454	0.0435327	0.0342837	0.0389598	0.0449712	0.0938787	0.0499203
8.25	0.0518298	0.0651254	0.0640734	0.0567279	0.0547938	0.0435703	0.0472221	0.0761456	0.0445744	0.0461205	0.0375135	0.0500178	0.0307866	0.0393054	0.0424577	0.0444943	0.0346114	0.0480337	0.0446767	0.0534097	0.060349	0.0493257		8.25	0.0477118	0.0344162	0.0495174	0.0379295	0.0464045	0.0573811	0.0836168	0.0743095	0.0425245	0.0363263	0.0404159	0.0442882	0.090864	0.0527466
8.5	0.0473819	0.0557242	0.0578395	0.057581	0.0463004	0.0459054	0.0675911	0.0709678	0.0454501	0.0483965	0.0423001	0.0448436	0.0357389	0.0329626	0.0354409	0.0446128	0.0340369	0.0549846	0.0370384	0.0479863	0.0576113	0.0481283		8.5	0.0512433	0.0290614	0.0459139	0.0433802	0.047307	0.055905	0.0795589	0.0680482	0.044797	0.0357707	0.0401975	0.0466051	0.18487	0.0594352
8.75	0.0492606	0.066404	0.0655955	0.0513311	0.0552702	0.0419623	0.0495783	0.0848814	0.0340989	0.0447396	0.0401767	0.053851	0.0301991	0.0350844	0.0457401	0.0460812	0.0329105	0.0551501	0.0345293	0.0410416	0.0564323	0.0483009		8.75	0.0694295	0.0339395	0.0529296	0.0419197	0.0448242	0.0614013	0.0579329	0.0669613	0.0401613	0.0407766	0.045873	0.0464259	0.144816	0.0574916
9	0.0472021	0.0648383	0.0640906	0.0587802	0.0441416	0.0470431	0.0623496	0.0563604	0.0317742	0.0462614	0.0397982	0.0589783	0.035469	0.0394121	0.0398734	0.0514447	0.0407833	0.0633253	0.0703242	0.0368481	0.0539907	0.0501471		9	0.047435	0.0333187	0.0500422	0.0407133	0.0463522	0.0644706	0.073675	0.0665879	0.0332727	0.0371154	0.0365594	0.0443454	0.187841	0.0585945
9.25	0.0516613	0.0583786	0.0536917	0.0527195	0.0525976	0.0520382	0.0611898	0.074618	0.0430021	0.0475493	0.0391331	0.0536801	0.062982	0.0337039	0.0458755	0.0416661	0.0279605	0.0630812	0.076752	0.0358734	0.0597897	0.0518068		9.25	0.0725145	0.0383639	0.0528731	0.0360617	0.0488212	0.0569201	0.0712606	0.0688458	0.0400841	0.0372263	0.0437245	0.0346965	0.180318	0.0601316
9.5	0.0481376	0.0603085	0.0710216	0.0521162	0.0494607	0.0483434	0.05647	0.110427	0.0389059	0.0511175	0.0426143	0.0601083	0.059017	0.0375138	0.052802	0.0379035	0.0304321	0.0789141	0.0714358	0.0459321	0.0499902	0.0549034		9.5	0.0563187	0.043826	0.0509921	0.0365524	0.0504885	0.0584732	0.0819243	0.0790403	0.0365333	0.0387487	0.0398122	0.0442853	0.188593	0.0619683
9.75	0.0541878	0.0659327	0.074694	0.0563206	0.0691685	0.0462742	0.0722575	0.0705813	0.0443138	0.0493917	0.0475379	0.0873034	0.0486454	0.0373839	0.0458287	0.0392276	0.043027	0.0361853	0.0621182	0.0369566	0.0603	0.0546493		9.75	0.0674427	0.0411951	0.0601312	0.049386	0.0584669	0.0545964	0.0806664	0.0759114	0.0410894	0.0401213	0.0424707	0.0485521	0.201737	0.0662897
10	0.05394	0.063303	0.066961	0.0602124	0.0630036	0.0545002	0.0590273	0.136914	0.0436393	0.0467709	0.0410951	0.114326	0.040286	0.0344698	0.0484743	0.0419101	0.0266769	0.0523013	0.040482	0.0449925	0.0622375	0.0569297		10	0.0590968	0.044743	0.0597874	0.0550905	0.0493815	0.0630485	0.110299	0.0732095	0.0452496	0.0390552	0.0462595	0.0382423	0.178293	0.0662889
10.25	0.0562625	0.0749358	0.0640821	0.0683387	0.0565747	0.0575432	0.0633191	0.103148	0.0545603	0.0501349	0.0423395	0.0477572	0.0706861	0.0321926	0.0432099	0.0415109	0.0358511	0.0467885	0.0558303	0.0510268	0.0603354	0.0560204		10.25	0.0705991	0.0395783	0.057741	0.0505805	0.0537923	0.0661185	0.141061	0.075386	0.0377892	0.0414132	0.0484029	0.0366459	0.18659	0.0696691
10.5	0.0577974	0.069531	0.0697034	0.0730795	0.0485335	0.0571763	0.086656	0.096446	0.0631146	0.0488717	0.0453485	0.063192	0.0445534	0.0308169	0.0495109	0.0321079	0.0283426	0.0354787	0.038235	0.0418787	0.045383	0.0536075		10.5	0.0503302	0.0387257	0.0602026	0.0342193	0.0476816	0.0531719	0.115554	0.0759526	0.043531	0.0372208	0.040566	0.0507453	0.188415	0.064332
10.75	0.0550906	0.0738831	0.0712912	0.0659645	0.0596571	0.0486037	0.0661666	0.104103	0.0481827	0.049869	0.0428144	0.0449667	0.0579964	0.0342749	0.0421677	0.0359389	0.0353193	0.0649492	0.0590338	0.0335999	0.0409689	0.0540401		10.75	0.0579632	0.0441117	0.0583118	0.0428192	0.0619472	0.0605647	0.129632	0.0768788	0.0371173	0.0382193	0.0390445	0.0491133	0.176882	0.0671235
11	0.0669641	0.0852014	0.0699872	0.0718529	0.0516183	0.0531082	0.0755407	0.0898719	0.054951	0.0493351	0.0338515	0.0487268	0.0635504	0.0257144	0.0448915	0.0326787	0.0237751	0.0304982	0.0660685	0.0400108	0.0463893	0.0535517		11	0.0555055	0.0359362	0.0547019	0.0373019	0.0673175	0.0661743	0.0964197	0.0742051	0.0357219	0.0358194	0.0372997	0.0324897	0.184152	0.062542
11.25	0.0648564	0.0740918	0.0736028	0.0688891	0.0485284	0.0620785	0.065992	0.125077	0.0544636	0.0440707	0.03883	0.0852002	0.0517969	0.031378	0.0456701	0.0335482	0.0354058	0.0562302	0.0664661	0.0414837	0.0446268	0.0577279		11.25	0.0689354	0.0419252	0.0562699	0.0598036	0.0580511	0.0793016	0.10774	0.0740039	0.0411302	0.0382223	0.0361134	0.0463016	0.175288	0.0679297
11.5	0.0654578	0.0780129	0.0919376	0.0689816	0.0511709	0.0651738	0.0766005	0.137206	0.0506366	0.0477304	0.0358485	0.0659533	0.0424134	0.0319913	0.0344323	0.0331727	0.0443728	0.0708405	0.0451097	0.0400142	0.0680477	0.0592907		11.5	0.0567216	0.0353636	0.0604908	0.0608521	0.0735615	0.0791444	0.0777141	0.0787287	0.0405023	0.0380832	0.0387866	0.045629	0.206221	0.0685999
11.75	0.0592318	0.0782743	0.0768116	0.0731288	0.0572984	0.0610827	0.0852098	0.101506	0.0507432	0.0492899	0.0432437	0.07345	0.0436696	0.0381222	0.0490735	0.0439681	0.0369875	0.106259	0.0415622	0.0532417	0.0390267	0.0600562		11.75	0.061625	0.0400219	0.0694563	0.0724791	0.0547124	0.0613944	0.0814388	0.0810559	0.0427052	0.0404094	0.0389886	0.0422808	0.203342	0.0684546
12	0.0624755	0.0781019	0.0693144	0.072885	0.0613125	0.0573738	0.0698047	0.0946232	0.0571573	0.0578137	0.0397457	0.0644264	0.0432359	0.0317098	0.0353288	0.0386944	0.0434041	0.0716684	0.0848572	0.0462705	0.0472128	0.0584484		12	0.0703217	0.0394006	0.0636466	0.0830439	0.0550616	0.0712196	0.12258	0.0790057	0.0463445	0.0405081	0.0402831	0.0394294	0.172007	0.0709886
12.25	0.060842	0.0803092	0.067675	0.074836	0.0630056	0.067525	0.0681767	0.13543	0.0412873	0.0541774	0.0415385	0.0556898	0.0793097	0.0419794	0.0627656	0.0417101	0.0303093	0.0648981	0.084009	0.0418609	0.0397024	0.0617637		12.25	0.0586021	0.0403002	0.0607404	0.0547654	0.0694039	0.0782151	0.111475	0.0818389	0.0491817	0.0332842	0.0451183	0.0440087	0.193129	0.0707741
12.5	0.0715082	0.0813992	0.0949446	0.0750643	0.0760974	0.0630843	0.0736001	0.166205	0.0568108	0.0460064	0.0362237	0.0508137	0.0542277	0.0329031	0.0485142	0.0491404	0.0234001	0.0462843	0.0596457	0.0411925	0.0540231	0.0619566		12.5	0.0703829	0.0521233	0.0660209	0.0634899	0.0585897	0.0875426	0.125761	0.0879416	0.0484742	0.0386376	0.0428058	0.0367943	0.193006	0.0747361
12.75	0.0707258	0.0675491	0.0731815	0.0762136	0.0604235	0.0656572	0.0768348	0.123132	0.0587056	0.0417119	0.0455581	0.066252	0.0566194	0.0333823	0.0502203	0.0465165	0.0345614	0.0547757	0.0432978	0.0291501	0.0613608	0.058849		12.75	0.0777968	0.0379377	0.0707719	0.0408608	0.0600104	0.0807307	0.14414	0.0752033	0.0431671	0.0414999	0.0399821	0.0362648	0.225268	0.0748949
13	0.0677365	0.0764553	0.102238	0.0737323	0.0580782	0.0800258	0.0701491	0.127272	0.0589691	0.0462282	0.04186	0.0640115	0.0695275	0.0388513	0.0579935	0.0508012	0.0401444	0.0421304	0.0718899	0.0332779	0.0587713	0.0633402		13	0.0754836	0.0430147	0.0668778	0.057775	0.0767093	0.0666504	0.126558	0.0723172	0.0397973	0.041034	0.0369825	0.0409722	0.237288	0.0754969
13.25	0.0656815	0.0845184	0.0766031	0.0800417	0.0575884	0.06583	0.0776246	0.162077	0.0578957	0.0442258	0.0413138	0.0656861	0.0550517	0.034415	0.0551081	0.0358118	0.0376849	0.0451679	0.0353791	0.0325437	0.0679798	0.060868		13.25	0.0700697	0.0537835	0.0687403	0.0537488	0.0762427	0.0731681	0.0965388	0.0799563	0.0387964	0.0435247	0.0375438	0.0358887	0.202614	0.0715858
13.5	0.0658111	0.0852407	0.0964119	0.0827496	0.0616426	0.0615965	0.0554973	0.125466	0.0508709	0.0431264	0.0390197	0.0507118	0.0636682	0.0343885	0.0552363	0.0337445	0.0247669	0.0283741	0.0683342	0.0327315	0.0583537	0.0579878		13.5	0.0645694	0.0520823	0.0673559	0.0600224	0.060788	0.0698329	0.129856	0.0763797	0.0382239	0.044402	0.0417914	0.0337703	0.206132	0.0727081
13.75	0.0688189	0.0825049	0.0783508	0.0819111	0.0661266	0.0681917	0.089005	0.121208	0.0534069	0.0480831	0.0450578	0.0603145	0.0649982	0.0343154	0.0551936	0.0391342	0.041708	0.0290146	0.0749781	0.0426488	0.0430421	0.0613339		13.75	0.085594	0.0533925	0.0678373	0.0593599	0.0756646	0.0900748	0.147037	0.0777404	0.0445936	0.0416502	0.0386553	0.0378627	0.218638	0.0798538
14	0.0699071	0.0827219	0.0770116	0.0911562	0.0738231	0.069162	0.0795432	0.143241	0.0477014	0.0507702	0.044341	0.07832	0.0414658	0.0398813	0.0545319	0.0422437	0.033569	0.0407873	0.0519594	0.0399146	0.0617614	0.0625625		14	0.0717733	0.0514216	0.0704339	0.0575658	0.0702126	0.0786987	0.127349	0.0812685	0.0421684	0.0410271	0.0373949	0.0396712	0.209371	0.0752581
14.25	0.0587641	0.0845515	0.0840427	0.0905563	0.0707009	0.0690304	0.0840367	0.150815	0.0420418	0.0445318	0.0396206	0.0705156	0.0783036	0.0441274	0.048422	0.0352013	0.0328885	0.0592478	0.0545586	0.0320653	0.0516419	0.0631268		14.25	0.0625116	0.0560415	0.0650215	0.0621259	0.066305	0.0840506	0.14152	0.0865337	0.0444156	0.0399912	0.0404519	0.043229	0.211191	0.0771837
14.5	0.0703617	0.0803146	0.0775951	0.0860478	0.0747439	0.0694148	0.10548	0.116125	0.055823	0.05458	0.0465761	0.0664859	0.0448151	0.0358474	0.0547551	0.0438742	0.037226	0.0568383	0.0506676	0.0425859	0.0528407	0.0629999		14.5	0.0721473	0.05361	0.0753861	0.0620516	0.0772663	0.0790911	0.156229	0.0855296	0.0451354	0.0438362	0.0372394	0.0389761	0.213374	0.0799902
14.75	0.0643615	0.0825639	0.0836891	0.0890322	0.0605949	0.0717136	0.0702384	0.144372	0.0544578	0.0518254	0.0432242	0.0717833	0.0799759	0.0425676	0.0495265	0.0434198	0.0398463	0.0370647	0.0751061	0.0386778	0.0541617	0.0642001		14.75	0.0743226	0.049891	0.073432	0.0731518	0.0666919	0.077892	0.108723	0.0878193	0.0417833	0.0457308	0.0479951	0.0390656	0.221051	0.0775038
15	0.0664922	0.0819959	0.1053	0.0947759	0.0646506	0.0780504	0.0856146	0.116599	0.0559677	0.0551948	0.0467159	0.0513318	0.115992	0.043104	0.0638598	0.0419124	0.0422706	0.0593248	0.0455529	0.0413398	0.0575469	0.0673139		15	0.0768872	0.0521001	0.0701393	0.0788037	0.0695711	0.0887249	0.0941865	0.0727889	0.0405977	0.0502267	0.0371701	0.0440355	0.233005	0.0775567
15.25	0.0719611	0.0880038	0.1013	0.0923127	0.0607356	0.0733575	0.0836755	0.1103	0.052108	0.0489896	0.0495693	0.0620029	0.0867992	0.0525	0.0643998	0.0456402	0.040299	0.0439626	0.0571715	0.0399564	0.063511	0.0661217		15.25	0.066198	0.0487868	0.0612016	0.0724982	0.0791898	0.0765228	0.0977227	0.0664805	0.0378113	0.0466427	0.0419272	0.0400302	0.198492	0.071808
15.5	0.0659816	0.0887518	0.08338	0.0883425	0.0629212	0.0741146	0.0861822	0.133188	0.0497833	0.0533263	0.046663	0.0687724	0.0910884	0.0484745	0.0730615	0.0342758	0.0362794	0.087186	0.0833983	0.0371935	0.0823476	0.0702244		15.5	0.0704809	0.0522833	0.0597607	0.0628998	0.0723833	0.0903222	0.092133	0.0663766	0.0333294	0.0482704	0.0429154	0.0364728	0.200712	0.0714108
15.75	0.0742585	0.100334	0.106471	0.0963167	0.0703621	0.0776491	0.0799305	0.174869	0.0469673	0.052526	0.0462205	0.0558455	0.0587233	0.0358746	0.0605578	0.0495216	0.0388415	0.0507315	0.0582501	0.0372417	0.0785985	0.0690519		15.75	0.0743783	0.0612989	0.0800289	0.0614742	0.0653009	0.0785109	0.0954104	0.0724297	0.0429993	0.0492486	0.0369594	0.0394516	0.218956	0.0751113
16	0.0745571	0.0952661	0.101479	0.102121	0.0909276	0.0876705	0.0851158	0.130425	0.0512603	0.0531069	0.0484425	0.062053	0.0797496	0.0432552	0.0492692	0.0433675	0.0427506	0.0521368	0.0636673	0.0354568	0.0654603	0.0694066		16	0.0881415	0.060749	0.075907	0.069987	0.0801216	0.0871477	0.147946	0.0770143	0.0406641	0.0491765	0.0389012	0.0393143	0.200309	0.081183
16.25	0.0683626	0.0858833	0.0889967	0.097588	0.0795066	0.0807648	0.0861098	0.143793	0.0546246	0.0563585	0.0467662	0.0429614	0.0678397	0.0374682	0.0627325	0.0472322	0.0391635	0.0469919	0.0935217	0.0363066	0.0659743	0.0680451		16.25	0.079704	0.0594136	0.0743609	0.0824984	0.0732612	0.0996273	0.132506	0.0696564	0.0405192	0.0505093	0.0370663	0.0389348	0.210867	0.0806865
16.5	0.0733367	0.0958185	0.106923	0.100532	0.0814892	0.0880145	0.0675416	0.11899	0.0604662	0.0502188	0.0458755	0.0512558	0.0700009	0.0356192	0.0562872	0.0449118	0.035942	0.0521038	0.0680286	0.0370595	0.0603965	0.0667053		16.5	0.0991068	0.0563602	0.0687866	0.0600498	0.0847258	0.0935985	0.146911	0.0741366	0.0437687	0.0465435	0.0385575	0.0368346	0.198742	0.0806247
16.75	0.078423	0.0887731	0.0955932	0.098834	0.0701907	0.0923143	0.0879805	0.147873	0.0546287	0.0575692	0.0485791	0.0549373	0.109173	0.0414277	0.0497712	0.0462469	0.0307218	0.0412172	0.0535687	0.0358842	0.0549842	0.0685091		16.75	0.0805924	0.057446	0.0825319	0.0721442	0.0758273	0.0946445	0.13911	0.072996	0.0437932	0.0493776	0.0487069	0.0377806	0.204313	0.0814818
17	0.0806117	0.0984911	0.0924505	0.10367	0.0871017	0.0822681	0.0862453	0.143962	0.0586224	0.0523789	0.053734	0.0636854	0.0741096	0.0452915	0.0593627	0.0375689	0.040903	0.0429082	0.0556731	0.033325	0.0628127	0.0692941		17	0.104766	0.0645542	0.0801067	0.0763275	0.0703718	0.0965192	0.113671	0.0782836	0.0421101	0.0479173	0.0404781	0.051083	0.206293	0.0824986
17.25	0.0888515	0.0921718	0.0982808	0.101151	0.0635263	0.0812955	0.0865282	0.120321	0.0538761	0.0535773	0.0508945	0.0568108	0.0642436	0.0411397	0.0632965	0.0370452	0.0398989	0.0381189	0.0444413	0.0436582	0.0430217	0.0648642		17.25	0.0951151	0.0672025	0.0774731	0.0726568	0.0795839	0.0845241	0.141006	0.0718217	0.0490816	0.0459322	0.0425729	0.0517767	0.242431	0.0862444
17.5	0.0819654	0.0963526	0.093491	0.108552	0.076096	0.0955062	0.0753002	0.144556	0.0662463	0.0539053	0.0522219	0.0580264	0.0811404	0.042855	0.0839334	0.0446554	0.035296	0.0589384	0.0438857	0.0377774	0.0620657	0.0710842		17.5	0.0928131	0.0730632	0.0860189	0.0735059	0.0889889	0.091489	0.112288	0.0693127	0.0432648	0.0508187	0.0408449	0.0358214	0.201771	0.0815385
17.75	0.0892949	0.0928017	0.091145	0.0968561	0.0745863	0.0824704	0.0892835	0.175158	0.0648339	0.0541913	0.0469145	0.0546857	0.102748	0.0423138	0.0575059	0.037402	0.0336132	0.0530445	0.0464709	0.0333187	0.0572954	0.0702826		17.75	0.099838	0.0758491	0.0845328	0.0845583	0.0808762	0.104364	0.131736	0.0769626	0.0411713	0.0477304	0.0407212	0.0384999	0.195192	0.0847717
18	0.0744489	0.0885243	0.093893	0.108288	0.0786619	0.0727679	0.0910575	0.134664	0.0519113	0.0556634	0.0527375	0.0580834	0.106342	0.0594775	0.0596548	0.0465496	0.0328071	0.0529568	0.0688276	0.0447371	0.0572226	0.0709179		18	0.0747744	0.0590007	0.0738362	0.0917353	0.0755406	0.0912686	0.153355	0.0825914	0.0474112	0.0558155	0.0391004	0.0317845	0.200992	0.082862
18.25	0.0893031	0.0936105	0.10712	0.107225	0.0685441	0.0858032	0.0894116	0.14522	0.0555114	0.0615757	0.0537661	0.057354	0.0996445	0.0714282	0.0708652	0.040457	0.0337555	0.0768337	0.0653253	0.0326799	0.0654578	0.0748044		18.25	0.0902655	0.0694241	0.0808582	0.0858454	0.0861212	0.107548	0.126546	0.0692473	0.0397315	0.0555491	0.0377933	0.0317664	0.117896	0.0768148
18.5	0.0853533	0.0931401	0.0865019	0.104411	0.0830181	0.0960128	0.095511	0.112926	0.0557452	0.0558475	0.0546325	0.0573248	0.133524	0.0518689	0.0641091	0.0688791	0.0294393	0.0666012	0.0701856	0.0359793	0.0828036	0.0754197		18.5	0.0903536	0.0573848	0.0881723	0.095236	0.0805337	0.0940368	0.172467	0.0732061	0.0447688	0.0512877	0.0401171	0.0373094	0.142763	0.0821259
18.75	0.0836197	0.102827	0.0837767	0.104554	0.0736979	0.0939797	0.0819642	0.150519	0.0640611	0.0567017	0.0550242	0.0642427	0.133489	0.0426661	0.0620787	0.0473267	0.0359731	0.0544377	0.0618842	0.0305307	0.0539485	0.0732049		18.75	0.0914164	0.069926	0.083018	0.0871334	0.075723	0.09809	0.129956	0.0753316	0.0388864	0.0475556	0.042044	0.0270928	0.15447	0.0785111
19	0.0903641	0.0977657	0.119367	0.112981	0.0757109	0.0808168	0.086644	0.154941	0.0562153	0.0615495	0.0479933	0.0678387	0.116794	0.0452663	0.0641971	0.0386966	0.0369883	0.0651346	0.0482384	0.030684	0.06995	0.0746731		19	0.103848	0.0655581	0.0923796	0.0942982	0.0781928	0.119122	0.119594	0.0774898	0.040421	0.0494085	0.0431994	0.0346427	0.147279	0.0819564
19.25	0.0941383	0.0942396	0.102163	0.105633	0.0872101	0.0878862	0.0937667	0.184312	0.0595184	0.0614492	0.049583	0.0580002	0.159998	0.0478382	0.0586138	0.048869	0.0384312	0.0549692	0.0827577	0.0326936	0.0553495	0.0789248		19.25	0.0905276	0.074944	0.0868862	0.0819141	0.0831537	0.103221	0.162282	0.0738757	0.0380627	0.0489159	0.0393358	0.0365765	0.149343	0.0822337
19.5	0.0867072	0.0933046	0.0982667	0.109468	0.100625	0.10384	0.0922686	0.127032	0.0622125	0.0602797	0.0545738	0.0671609	0.165818	0.0542035	0.0673049	0.044098	0.0308718	0.081822	0.0998014	0.0370385	0.0844349	0.0819587		19.5	0.0943012	0.074701	0.0951673	0.0928067	0.0757031	0.111821	0.171403	0.0782479	0.0389745	0.0482742	0.0383652	0.0366217	0.154561	0.0854576
19.75	0.0861114	0.0968142	0.114626	0.107385	0.0755446	0.0858172	0.107953	0.151023	0.0767309	0.0608253	0.0551194	0.0692559	0.0611837	0.0580585	0.0629598	0.0443973	0.0347019	0.0573947	0.0409375	0.0321642	0.0589639	0.0732366		19.75	0.0935933	0.0792775	0.0885939	0.0953253	0.0905286	0.0994771	0.134637	0.0706396	0.0394925	0.0483837	0.040359	0.0354037	0.179983	0.0842842
20	0.0884649	0.100666	0.097158	0.106388	0.0642395	0.084155	0.110779	0.135107	0.0769648	0.0567177	0.0487121	0.056873	0.105662	0.0486724	0.0627247	0.0471225	0.0313273	0.0859046	0.0742943	0.0290194	0.068806	0.0752266		20	0.0903736	0.0887798	0.0908209	0.089064	0.0878336	0.101517	0.208841	0.0744757	0.0433226	0.0508523	0.0415167	0.0326607	0.163086	0.0894726
20.25	0.0934745	0.0998336	0.0955849	0.116422	0.0636957	0.0871356	0.102804	0.208566	0.063224	0.0617811	0.0513204	0.0596861	0.0932135	0.0472904	0.0610968	0.0521866	0.0364388	0.0541444	0.0844395	0.0387964	0.0562243	0.0774933		20.25	0.0999187	0.081173	0.0983268	0.0771032	0.0858298	0.114648	0.149292	0.0720983	0.0429511	0.0501706	0.041621	0.0377983	0.137247	0.0837059
20.5	0.103829	0.10539	0.107979	0.110627	0.0683865	0.102064	0.100995	0.159844	0.0741809	0.0616982	0.0519727	0.0715625	0.098175	0.0506821	0.0665697	0.0482177	0.0318787	0.0450628	0.0532842	0.0377934	0.0702149	0.0771623		20.5	0.10487	0.0913944	0.0960909	0.08896	0.0740305	0.0939033	0.156789	0.0793735	0.0435793	0.0488993	0.0406069	0.0401895	0.178354	0.0874646
20.75	0.0956197	0.105227	0.099235	0.114014	0.0952042	0.0896517	0.110049	0.153348	0.0617415	0.0548101	0.0519148	0.060767	0.0901099	0.0404015	0.0545795	0.0485727	0.0439778	0.0444443	0.0643864	0.0311963	0.0624175	0.0748413		20.75	0.0929694	0.0800309	0.095221	0.0868948	0.0940694	0.115758	0.177555	0.0800738	0.0438747	0.0519107	0.0374233	0.0387385	0.17059	0.0896238
21	0.0968521	0.100957	0.110644	0.118076	0.0950313	0.111944	0.0936222	0.156898	0.061348	0.0614686	0.0506032	0.0795066	0.117617	0.0531421	0.0603171	0.0466562	0.0335564	0.0546943	0.0645984	0.0358336	0.0655691	0.0794731		21	0.107665	0.0885952	0.0917237	0.0908706	0.0942984	0.106462	0.173214	0.0805413	0.042691	0.0512447	0.0387168	0.0397231	0.149234	0.0888446
21.25	0.0999133	0.108564	0.110703	0.113224	0.0953576	0.0953565	0.0993235	0.175972	0.072213	0.0589646	0.0489868	0.0781712	0.0791139	0.054568	0.0576097	0.0401942	0.0355099	0.0423629	0.0601136	0.031913	0.0473175	0.0764501		21.25	0.119684	0.0916962	0.0944001	0.121745	0.102259	0.11816	0.159479	0.083279	0.0426289	0.0531927	0.0374849	0.0443185	0.161849	0.0946289
21.5	0.098785	0.110211	0.104852	0.126038	0.082937	0.0896817	0.106149	0.157977	0.0738165	0.0591232	0.0509777	0.064661	0.105459	0.0434745	0.0647294	0.040095	0.0366385	0.0444593	0.0714047	0.0346947	0.0652075	0.0776843		21.5	0.107856	0.0795932	0.0910983	0.0853411	0.0789203	0.116474	0.169337	0.0841743	0.0438709	0.0551139	0.0384764	0.0355106	0.158199	0.0879973
21.75	0.0927605	0.119937	0.102507	0.119492	0.103804	0.0914424	0.109453	0.156067	0.066985	0.0589763	0.048206	0.0740038	0.0796407	0.0434911	0.0586265	0.0527707	0.0340739	0.0636757	0.0796215	0.0320231	0.0576113	0.0783414		21.75	0.100201	0.0874145	0.0871625	0.090049	0.0945403	0.114764	0.147608	0.0843457	0.0441564	0.0528131	0.0373525	0.047725	0.130832	0.0860742
22	0.092091	0.107166	0.109934	0.116642	0.0909512	0.0980905	0.0830053	0.162244	0.0680493	0.0591023	0.0502237	0.0624923	0.0712297	0.043607	0.0553714	0.05007	0.0387533	0.0660456	0.0573816	0.0384761	0.0579337	0.0751837		22	0.102674	0.0772545	0.100758	0.109093	0.0986453	0.120601	0.124662	0.0898943	0.0478393	0.0530543	0.0407523	0.0454982	0.0940514	0.0849828
22.25	0.103669	0.107896	0.124751	0.131388	0.0988912	0.103663	0.102943	0.178695	0.0693922	0.0605251	0.0560008	0.0758965	0.084395	0.0530815	0.0504679	0.0555918	0.0351815	0.0459725	0.0933717	0.0429353	0.0651881	0.0828522		22.25	0.112775	0.0758362	0.0893581	0.106947	0.085299	0.106898	0.151673	0.085538	0.0506559	0.0522388	0.0446596	0.0439736	0.148463	0.0887935
22.5	0.105328	0.108202	0.107263	0.111783	0.0839396	0.113747	0.0903058	0.132694	0.0566333	0.0546203	0.0489938	0.067879	0.0819827	0.0365033	0.0587603	0.0445601	0.0363183	0.0692972	0.0658687	0.0387198	0.0519674	0.0745413		22.5	0.120081	0.0983789	0.103316	0.116095	0.0917326	0.117289	0.136345	0.0843812	0.0483233	0.054605	0.0357879	0.0475142	0.169687	0.0941181
22.75	0.100691	0.111908	0.125642	0.123537	0.0909066	0.113958	0.0956097	0.198128	0.0695191	0.0642013	0.0497633	0.080654	0.0847212	0.0473374	0.055734	0.0477651	0.0334741	0.0619608	0.0437701	0.0438907	0.0591852	0.0810646		22.75	0.112052	0.101463	0.0993283	0.098492	0.108895	0.130275	0.136257	0.0832363	0.0506417	0.0513201	0.0398552	0.0408226	0.172164	0.0942156
23	0.10183	0.122204	0.0943754	0.126263	0.120445	0.109923	0.109043	0.154292	0.0750485	0.0606743	0.051149	0.0729289	0.091569	0.0424193	0.0589468	0.0416705	0.0410711	0.0661305	0.0482424	0.0468985	0.0481344	0.0801552		23	0.115553	0.0867322	0.104532	0.115668	0.109207	0.123299	0.172736	0.0950334	0.0495262	0.0505267	0.036553	0.0451443	0.163942	0.0975733
23.25	0.103327	0.11687	0.117347	0.133163	0.103447	0.120336	0.10749	0.228561	0.0751203	0.0573706	0.0477033	0.0627852	0.091799	0.0525039	0.0510884	0.0415861	0.0387981	0.0363353	0.105424	0.043334	0.059354	0.0854163		23.25	0.110381	0.101211	0.111367	0.10083	0.104465	0.126688	0.139819	0.0959021	0.0508022	0.0536729	0.0382982	0.0462589	0.172374	0.0963129
23.5	0.108218	0.129638	0.115846	0.136935	0.0825392	0.124166	0.0912118	0.139305	0.0761595	0.058855	0.0472552	0.0707086	0.0878464	0.0371068	0.056407	0.0483664	0.0439922	0.0669695	0.0601061	0.0443409	0.045351	0.0795869		23.5	0.125215	0.102352	0.105453	0.108883	0.0958053	0.12866	0.174515	0.0987888	0.0556441	0.0530546	0.0429025	0.0537401	0.18747	0.102499
23.75	0.103279	0.12477	0.111681	0.135663	0.0841587	0.112179	0.100809	0.230715	0.080346	0.0599573	0.0539847	0.0933917	0.113302	0.0374169	0.0651396	0.0421934	0.0370506	0.0604703	0.0595555	0.0436096	0.0529878	0.0858409		23.75	0.115928	0.113493	0.109072	0.0982719	0.10564	0.137119	0.146682	0.088489	0.0497557	0.0541608	0.0370948	0.0569943	0.184916	0.0998167
24	0.115333	0.122999	0.123339	0.131367	0.10726	0.122117	0.0912554	0.181879	0.079318	0.060216	0.0547584	0.0831245	0.074009	0.0616463	0.0752693	0.0406603	0.0381199	0.0542229	0.0772198	0.0516424	0.0458971	0.0853168		24	0.150111	0.115219	0.10575	0.0816208	0.104434	0.130519	0.180404	0.0979308	0.052179	0.0463526	0.0395029	0.0430404	0.213848	0.104685
24.25	0.108493	0.11781	0.10695	0.129792	0.0654573	0.128543	0.0780197	0.189372	0.0782907	0.0602784	0.0480758	0.0808646	0.0852544	0.0485185	0.067132	0.0538891	0.04905	0.050466	0.0422125	0.0449019	0.0590187	0.08059		24.25	0.11368	0.0860991	0.112845	0.0926448	0.111575	0.135976	0.137321	0.0893898	0.0484174	0.0581158	0.0444123	0.0459977	0.193321	0.0976765
24.5	0.122187	0.130363	0.110894	0.143697	0.104407	0.126098	0.101565	0.212395	0.0808457	0.0622671	0.0468454	0.0751492	0.0512738	0.0411214	0.0618698	0.0417803	0.0388503	0.0338523	0.0453998	0.0506612	0.0626438	0.0830556		24.5	0.115316	0.114816	0.103127	0.121255	0.103442	0.131676	0.188842	0.091435	0.0537354	0.052201	0.0438929	0.0567235	0.2038	0.106174
24.75	0.106565	0.12381	0.121011	0.139715	0.100978	0.120677	0.0945236	0.183331	0.0733779	0.0641065	0.0497164	0.0834209	0.0554477	0.0513641	0.0594507	0.0406804	0.0371654	0.0345601	0.0343444	0.04301	0.0592579	0.079834		24.75	0.137975	0.11451	0.107513	0.109568	0.100775	0.147952	0.148062	0.0968536	0.0481579	0.0507828	0.0452748	0.055644	0.182594	0.103512
25	0.109497	0.122796	0.134257	0.141661	0.109823	0.116039	0.115464	0.207885	0.0965255	0.0658715	0.0511264	0.0810677	0.0775012	0.0486059	0.0577343	0.0399818	0.039987	0.0545895	0.0710878	0.051367	0.0455465	0.0875435		25	0.152601	0.0965278	0.123855	0.115507	0.111241	0.137556	0.173007	0.094844	0.0573438	0.0555001	0.0459977	0.0512255	0.193924	0.108395
25.25	0.118038	0.130478	0.121996	0.137933	0.101843	0.128099	0.11041	0.143787	0.0830126	0.06591	0.0522778	0.0729728	0.0885397	0.0459023	0.0615007	0.0446882	0.0382434	0.0476105	0.0419252	0.0401503	0.0480487	0.0820651		25.25	0.127269	0.101691	0.120246	0.108734	0.117782	0.123322	0.178677	0.105901	0.0561451	0.0564477	0.04774	0.0571221	0.19501	0.107391
25.5	0.122283	0.120558	0.148829	0.136957	0.0878523	0.141874	0.112458	0.2227	0.0719691	0.0655197	0.0456694	0.0753764	0.0903311	0.0450829	0.0573806	0.0413302	0.0389277	0.0537778	0.0668429	0.0362426	0.0569771	0.0875685		25.5	0.127098	0.110335	0.120609	0.115784	0.12729	0.155967	0.151249	0.111093	0.054828	0.0536756	0.0449542	0.0617841	0.215279	0.111534
25.75	0.115756	0.121854	0.137531	0.14208	0.0973394	0.126324	0.099507	0.199749	0.0661986	0.0657594	0.0483737	0.0716725	0.121203	0.0399567	0.065529	0.033838	0.0290843	0.0342393	0.0551304	0.0429668	0.0576339	0.0843679		25.75	0.120802	0.0932661	0.114445	0.110341	0.117667	0.136696	0.162862	0.114067	0.0534966	0.0530218	0.039066	0.0509781	0.195381	0.104776
26	0.11448	0.132548	0.123985	0.145308	0.122036	0.119839	0.129001	0.122106	0.0966254	0.0640292	0.048811	0.0640947	0.0778712	0.0474097	0.0567281	0.0382097	0.0424166	0.0487511	0.0601218	0.0485589	0.0534489	0.0836372		26	0.122166	0.109826	0.124464	0.105901	0.113868	0.157334	0.151829	0.116308	0.0620746	0.0532944	0.0419206	0.0590571	0.227128	0.111167
26.25	0.116366	0.137036	0.150853	0.145344	0.0811314	0.13245	0.0940521	0.204796	0.0832468	0.0662317	0.0524379	0.0720912	0.0560968	0.0358367	0.0476085	0.0469161	0.0376115	0.0444558	0.0408488	0.0437217	0.044581	0.0825578		26.25	0.135891	0.113073	0.121446	0.126492	0.113522	0.154877	0.181072	0.118382	0.0589473	0.0566565	0.0435162	0.0532259	0.198841	0.113534
26.5	0.116977	0.146272	0.12505	0.152213	0.0832399	0.149816	0.111693	0.156081	0.0787774	0.062828	0.0427467	0.102561	0.110061	0.03144	0.0560102	0.0438311	0.0309984	0.0654466	0.0409327	0.0477466	0.055272	0.0861902		26.5	0.127334	0.122042	0.124682	0.141841	0.113329	0.148944	0.165449	0.120439	0.0634329	0.0555922	0.0387468	0.0723572	0.212131	0.115871
26.75	0.129325	0.131315	0.122238	0.156154	0.101525	0.139543	0.112413	0.190146	0.0781095	0.0715708	0.0553393	0.0935671	0.0960367	0.0312679	0.0600846	0.0362389	0.0385735	0.051807	0.0820604	0.0438701	0.0571945	0.0894466		26.75	0.128093	0.126433	0.139746	0.147251	0.123867	0.147502	0.168452	0.103258	0.0555094	0.0576529	0.0453622	0.0453184	0.213945	0.115568
27	0.12868	0.134753	0.118959	0.155986	0.108884	0.144051	0.117186	0.215233	0.0795548	0.0686139	0.0574418	0.0680492	0.0844281	0.0529845	0.0690169	0.0331828	0.0452242	0.0697562	0.0682623	0.0461437	0.0696472	0.0921922		27	0.135383	0.123254	0.139181	0.117726	0.120416	0.162568	0.187334	0.108007	0.0487784	0.0627929	0.0473455	0.0567679	0.153222	0.112521
27.25	0.132435	0.141285	0.111385	0.155008	0.107467	0.155148	0.0959852	0.217323	0.0937844	0.0646393	0.0560202	0.081712	0.1258	0.0440428	0.0657152	0.0403623	0.0392553	0.0536173	0.0436002	0.0482178	0.0713603	0.0925791		27.25	0.137615	0.139942	0.132775	0.136907	0.100467	0.142552	0.219843	0.109982	0.0466673	0.0659226	0.0418239	0.0485844	0.172566	0.11505
27.5	0.120757	0.138474	0.125631	0.161138	0.107873	0.149329	0.122759	0.19558	0.0941384	0.0636353	0.0561252	0.0735086	0.0623107	0.0492093	0.0579825	0.0442692	0.0365763	0.0690963	0.0767098	0.0589805	0.0663681	0.0919263		27.5	0.144512	0.130452	0.140765	0.109122	0.119328	0.160846	0.141538	0.113961	0.0557214	0.05876	0.0469909	0.0557568	0.175246	0.111769
27.75	0.138322	0.143082	0.11545	0.164593	0.114303	0.145214	0.117765	0.196557	0.0903997	0.0710222	0.0544116	0.084715	0.0920365	0.0593735	0.0585033	0.0384376	0.0391826	0.0371565	0.0372211	0.0534229	0.0624453	0.0911244		27.75	0.133133	0.133943	0.135157	0.13481	0.126854	0.158342	0.156803	0.113462	0.0519871	0.0598146	0.0461366	0.0652391	0.200311	0.116615
28	0.139054	0.137507	0.125947	0.156511	0.126807	0.141606	0.112298	0.167088	0.0980868	0.0666822	0.0565498	0.0749804	0.0993002	0.0445651	0.0632321	0.0439793	0.0393851	0.0545785	0.0538304	0.0514208	0.0566186	0.0909537		28	0.175919	0.128477	0.132369	0.114534	0.122164	0.157529	0.174745	0.111716	0.0548579	0.0578446	0.043188	0.0515354	0.157268	0.114011
28.25	0.126152	0.144371	0.147642	0.16132	0.100873	0.150037	0.103326	0.18598	0.0840278	0.0714983	0.0526531	0.0911817	0.0798384	0.0322686	0.0591906	0.0435608	0.0450404	0.036862	0.0520795	0.0525724	0.0663451	0.0898486		28.25	0.143722	0.128348	0.136831	0.132183	0.119735	0.148888	0.16038	0.113919	0.0555538	0.0553859	0.0448006	0.0555209	0.183936	0.113785
28.5	0.13707	0.154043	0.125563	0.144118	0.101059	0.148044	0.114658	0.237968	0.104927	0.0754866	0.0549659	0.0748829	0.0821225	0.0510198	0.0653694	0.0504333	0.0356882	0.0576802	0.0364111	0.0526511	0.0717481	0.0940909		28.5	0.134198	0.131723	0.130561	0.142054	0.109497	0.162271	0.161118	0.114762	0.0552284	0.056684	0.0463225	0.0592668	0.222834	0.117425
28.75	0.117519	0.133891	0.135409	0.151179	0.100186	0.149242	0.113136	0.168256	0.0979117	0.0696493	0.0571283	0.0806636	0.0933429	0.0499672	0.0646097	0.0444775	0.0383805	0.0421258	0.0444735	0.0432094	0.0644799	0.0885351		28.75	0.140897	0.135741	0.137949	0.140376	0.116893	0.149264	0.158842	0.12355	0.0587916	0.0597515	0.044099	0.0612345	0.214689	0.118621
29	0.120597	0.136834	0.124933	0.147048	0.126126	0.144779	0.0921374	0.156313	0.104184	0.0734471	0.0527508	0.0892738	0.0712674	0.0370631	0.0784211	0.0426558	0.0354549	0.0336974	0.0704544	0.0532497	0.0793084	0.0890474		29	0.134514	0.139102	0.132518	0.149189	0.121883	0.155972	0.158426	0.123091	0.0585765	0.0631315	0.0446664	0.0731007	0.223256	0.121341
29.25	0.133887	0.134228	0.121147	0.161752	0.106972	0.145694	0.110655	0.184018	0.0995365	0.0760052	0.0529477	0.091374	0.0420564	0.0446864	0.0565163	0.0464177	0.0401462	0.0788663	0.0719396	0.0486983	0.0621585	0.0909382		29.25	0.144541	0.141	0.137555	0.142256	0.137773	0.154213	0.170943	0.129703	0.0524309	0.0541283	0.0456526	0.0623316	0.212532	0.121928
29.5	0.134357	0.150869	0.127207	0.147086	0.0999725	0.134289	0.0907273	0.155179	0.111884	0.0748441	0.0562027	0.109361	0.0582597	0.0311737	0.071589	0.0474533	0.0426095	0.0646548	0.0429292	0.0501065	0.0497525	0.0881194		29.5	0.122509	0.141377	0.134164	0.117948	0.147031	0.154565	0.135676	0.125581	0.0552624	0.0540879	0.044273	0.0667834	0.239814	0.11839
29.75	0.127397	0.153147	0.156182	0.147921	0.104328	0.120315	0.106767	0.173465	0.120797	0.0713096	0.0531668	0.0959781	0.0390347	0.045849	0.0448441	0.0433364	0.0349782	0.0533787	0.0509458	0.0420943	0.0610842	0.0879199		29.75	0.148511	0.149987	0.135784	0.123524	0.145504	0.15291	0.163811	0.131642	0.0599138	0.0605717	0.0480749	0.070049	0.245413	0.125823
30	0.134287	0.148448	0.118048	0.15936	0.128382	0.142855	0.114906	0.167589	0.118117	0.0751548	0.0542413	0.0703575	0.0461271	0.0376577	0.0572255	0.0430629	0.0367175	0.046717	0.0532181	0.0477419	0.0648264	0.0888115		30	0.15808	0.158675	0.137409	0.137832	0.148078	0.153943	0.135528	0.138625	0.0608375	0.0519493	0.0451779	0.0624924	0.187319	0.121227
30.25	0.140022	0.147234	0.13732	0.153558	0.102102	0.147894	0.102258	0.186817	0.131391	0.0681354	0.050579	0.0845363	0.0468935	0.0410886	0.0530011	0.0418022	0.0393374	0.076187	0.0941269	0.055751	0.048554	0.0927899		30.25	0.176445	0.163051	0.144511	0.132048	0.131667	0.152901	0.139743	0.133403	0.0551594	0.0601334	0.0522603	0.0768576	0.216977	0.125781
30.5	0.142135	0.154188	0.132755	0.141924	0.132271	0.153507	0.107299	0.170904	0.124282	0.0766948	0.0490637	0.10078	0.040779	0.0481365	0.0461684	0.0407092	0.0405254	0.0465526	0.0492389	0.0519596	0.0435377	0.0901624		30.5	0.162717	0.16644	0.154848	0.122564	0.142657	0.166959	0.155118	0.138849	0.0594792	0.0600891	0.0435795	0.0799917	0.198643	0.127072
30.75	0.140658	0.162033	0.148502	0.160373	0.135808	0.14119	0.0793854	0.13536	0.124741	0.0750037	0.0609125	0.0860888	0.0832953	0.0552527	0.0704799	0.0501636	0.0310215	0.0919958	0.0706717	0.0537383	0.067442	0.0963865		30.75	0.151289	0.162841	0.151868	0.112101	0.117879	0.162361	0.176904	0.130649	0.0609614	0.0706205	0.052494	0.0587637	0.217995	0.125133
31	0.126467	0.150563	0.148495	0.168789	0.133022	0.144352	0.106992	0.160969	0.126263	0.0818029	0.0601212	0.0676221	0.06508	0.0411905	0.0701687	0.0504599	0.029031	0.0884822	0.0533262	0.041663	0.0519687	0.0936585		31	0.15862	0.175002	0.140199	0.13501	0.142611	0.169907	0.157138	0.10413	0.0537472	0.0640526	0.046551	0.0419941	0.213398	0.123258
31.25	0.147184	0.15477	0.128705	0.155379	0.126905	0.14526	0.101252	0.179185	0.14173	0.0725009	0.0651868	0.0696713	0.124475	0.0546927	0.0624254	0.0458675	0.0335181	0.101408	0.0811602	0.0442593	0.0785072	0.100669		31.25	0.157556	0.179206	0.148453	0.136522	0.133656	0.172482	0.169144	0.115449	0.0592636	0.0616034	0.0475601	0.0530846	0.200611	0.125738
31.5	0.143734	0.159793	0.146554	0.153864	0.116435	0.136785	0.11916	0.156979	0.134551	0.0757728	0.0689788	0.0776238	0.143405	0.0498965	0.0744638	0.0517541	0.041824	0.0709614	0.0399541	0.0513631	0.0584965	0.0986833		31.5	0.141975	0.174289	0.142105	0.133192	0.139515	0.174002	0.152783	0.111526	0.0515195	0.0608174	0.0438329	0.0563891	0.182322	0.120328
31.75	0.151861	0.158244	0.135428	0.162798	0.132777	0.142382	0.112636	0.214245	0.102384	0.0806288	0.0633726	0.0864365	0.0887102	0.0442703	0.0659313	0.043859	0.0319068	0.0939762	0.0712852	0.0455501	0.0797803	0.100403		31.75	0.161199	0.149685	0.153376	0.159177	0.137375	0.17162	0.160802	0.112934	0.0584375	0.0658188	0.0509598	0.0510444	0.196555	0.125306
32	0.151492	0.165782	0.170193	0.169277	0.132908	0.145247	0.0988518	0.165587	0.11418	0.0830811	0.0652981	0.0665907	0.111516	0.0434341	0.0675467	0.0510047	0.0317889	0.0819526	0.0423083	0.0408341	0.0786225	0.0989283		32	0.137588	0.157052	0.154707	0.147304	0.148106	0.163905	0.154445	0.119487	0.0530108	0.0663924	0.0456959	0.0541722	0.197569	0.123033
32.25	0.152605	0.153203	0.136618	0.175183	0.14628	0.147123	0.0934203	0.181222	0.110657	0.0760805	0.0627453	0.0740189	0.0803837	0.0561349	0.068864	0.0416966	0.0266169	0.0471545	0.0760071	0.0363167	0.0727006	0.0959539		32.25	0.170738	0.161104	0.165339	0.157674	0.117294	0.156896	0.198615	0.118208	0.0562907	0.0676734	0.0466596	0.0671114	0.214116	0.130594
32.5	0.141107	0.159067	0.158156	0.164573	0.118608	0.145244	0.100306	0.154421	0.113598	0.0723389	0.0632238	0.0842655	0.105934	0.058375	0.0649137	0.0448654	0.0402227	0.0652048	0.0711014	0.0425652	0.076371	0.0973553		32.5	0.147349	0.153651	0.147534	0.12624	0.138215	0.160368	0.178362	0.122684	0.0571638	0.0704284	0.0504098	0.0439696	0.217746	0.124163
32.75	0.144128	0.154453	0.13966	0.159034	0.116828	0.153024	0.0981255	0.182905	0.120578	0.0750541	0.0587314	0.0791892	0.0734069	0.0440666	0.0672775	0.042668	0.0265007	0.0600466	0.0404959	0.0340211	0.0676846	0.0922799		32.75	0.15115	0.153172	0.153745	0.165595	0.145505	0.176046	0.178368	0.124999	0.0530398	0.0735445	0.0493356	0.0612352	0.182175	0.128301
33	0.14959	0.154792	0.168544	0.163514	0.130909	0.161108	0.0993063	0.167426	0.0904176	0.0808837	0.0586987	0.0855732	0.0784429	0.0660813	0.0651274	0.0510599	0.0396801	0.0630413	0.0231169	0.0377496	0.077287	0.0958261		33	0.145421	0.175443	0.163525	0.170327	0.151091	0.181716	0.162253	0.128696	0.0575462	0.0676118	0.0460504	0.0627667	0.188495	0.130842
33.25	0.147139	0.150891	0.142301	0.167851	0.131155	0.150474	0.107781	0.14587	0.107137	0.0816099	0.0631035	0.0825148	0.0710854	0.0434808	0.0739253	0.046741	0.0424928	0.0512082	0.03595	0.0408714	0.0686878	0.0929652		33.25	0.150064	0.175458	0.158531	0.140047	0.128832	0.179659	0.167728	0.125518	0.0608046	0.069763	0.0437882	0.059336	0.189422	0.126842
33.5	0.149389	0.158725	0.140709	0.156203	0.151084	0.147684	0.119771	0.13472	0.115874	0.0821684	0.0603695	0.0654136	0.089563	0.0625239	0.0692736	0.0486029	0.0332253	0.0457242	0.0673883	0.0380087	0.0765586	0.0958562		33.5	0.150464	0.173808	0.156617	0.123311	0.152592	0.168444	0.195289	0.128337	0.0588708	0.0684923	0.0439508	0.0635609	0.206893	0.130049
33.75	0.154197	0.162747	0.154949	0.162172	0.15397	0.144853	0.0966098	0.177366	0.12923	0.0765337	0.0618263	0.0864598	0.107846	0.0453527	0.0636341	0.04676	0.0362708	0.0571322	0.0852555	0.0479017	0.0529097	0.100189		33.75	0.155643	0.165652	0.159136	0.143195	0.147876	0.167556	0.160044	0.129432	0.0589458	0.0728117	0.0461097	0.0651743	0.208933	0.12927
34	0.131251	0.160884	0.171426	0.168682	0.130475	0.155399	0.105074	0.157117	0.129483	0.0795672	0.064033	0.0589209	0.0944814	0.0371138	0.0559889	0.0414828	0.0350446	0.0469119	0.0439425	0.0455707	0.0688366	0.094366		34	0.169321	0.171986	0.168274	0.146211	0.143311	0.178061	0.178469	0.126439	0.058197	0.0665355	0.0477562	0.067618	0.203851	0.132772
34.25	0.160078	0.160146	0.160195	0.162766	0.147173	0.144256	0.108931	0.175559	0.128123	0.0768221	0.066202	0.0743831	0.0419222	0.0597874	0.0608033	0.0597953	0.0411009	0.0510927	0.0469989	0.0382432	0.0676645	0.096764		34.25	0.160301	0.186492	0.159475	0.149551	0.149607	0.154946	0.154379	0.130257	0.0620605	0.0684119	0.0505269	0.0548819	0.207666	0.129889
34.5	0.167387	0.168256	0.152793	0.155041	0.152415	0.142702	0.113724	0.180868	0.128372	0.0826712	0.068559	0.072279	0.0965639	0.060637	0.0610274	0.0563064	0.0369824	0.0708277	0.0640446	0.0477371	0.0851536	0.103064		34.5	0.161883	0.203582	0.16399	0.160261	0.132907	0.16914	0.153513	0.12255	0.0651239	0.0648942	0.0541872	0.0698149	0.217966	0.133832
34.75	0.155961	0.155174	0.141161	0.16228	0.133627	0.142753	0.100667	0.188832	0.122464	0.0789599	0.0667576	0.0854345	0.111452	0.0687736	0.0727672	0.0431217	0.0361943	0.0516285	0.0819702	0.0505112	0.0729031	0.101114		34.75	0.157651	0.189795	0.171123	0.141937	0.145115	0.179945	0.19595	0.131976	0.061929	0.0690118	0.0519566	0.0587454	0.241509	0.138203
35	0.159836	0.16305	0.1723	0.173511	0.151236	0.145457	0.0959696	0.187699	0.119683	0.078892	0.0717481	0.0857954	0.109472	0.0526228	0.0745369	0.0473997	0.0512086	0.0562982	0.0592926	0.0572522	0.0657971	0.103765		35	0.174031	0.201291	0.167401	0.166987	0.129395	0.156786	0.146728	0.137776	0.0690164	0.0671386	0.0574485	0.0594676	0.228076	0.135503
35.25	0.143267	0.169512	0.150869	0.168719	0.124551	0.154984	0.100684	0.164521	0.114002	0.0781462	0.0675654	0.0771988	0.0875257	0.0428063	0.08673	0.0369426	0.0435299	0.0781422	0.116002	0.0618897	0.0743474	0.101997		35.25	0.158138	0.182383	0.161151	0.139811	0.144941	0.170149	0.158178	0.135815	0.0658193	0.0704334	0.0548301	0.0687577	0.231359	0.133982
35.5	0.154346	0.170124	0.167414	0.165692	0.161022	0.136945	0.116294	0.20431	0.118273	0.0857833	0.0730804	0.0700123	0.0855104	0.0657164	0.0778873	0.0510595	0.0369004	0.101887	0.0947562	0.0516431	0.0823574	0.108143		35.5	0.168419	0.181097	0.173626	0.159341	0.141728	0.171668	0.150936	0.12683	0.07121	0.0652775	0.0509347	0.0662493	0.207601	0.133455
35.75	0.144072	0.157424	0.153947	0.165735	0.149869	0.128627	0.110911	0.175194	0.121424	0.0833979	0.0700351	0.0848569	0.0832707	0.0596983	0.0783389	0.056782	0.0409876	0.0673007	0.0769495	0.0448864	0.0862583	0.101903		35.75	0.159039	0.187061	0.168162	0.1771	0.131823	0.158053	0.190596	0.135241	0.0616224	0.0645853	0.0549564	0.0628674	0.21586	0.135921
36	0.165326	0.1591	0.160407	0.153337	0.138671	0.151028	0.102185	0.164844	0.106203	0.0833702	0.0754461	0.0664529	0.0791984	0.0635525	0.0682412	0.0464784	0.0377543	0.0565445	0.0644047	0.0476523	0.0815503	0.0986546		36	0.144171	0.178908	0.165441	0.127485	0.158492	0.166746	0.186522	0.14194	0.0647784	0.0676183	0.0568186	0.0805384	0.217479	0.135149
36.25	0.150044	0.16353	0.170473	0.166337	0.14304	0.158026	0.110721	0.155983	0.129975	0.0831168	0.068438	0.08423	0.0800899	0.0630062	0.073468	0.0575334	0.0407125	0.0465836	0.092703	0.0589407	0.0686597	0.103124		36.25	0.163252	0.214097	0.151848	0.126835	0.154158	0.160215	0.178742	0.140235	0.0672972	0.0686439	0.0529414	0.0578208	0.218513	0.134969
36.5	0.157441	0.167364	0.161715	0.156769	0.138956	0.135822	0.0862877	0.167372	0.139377	0.0805308	0.0657813	0.0771695	0.0781734	0.0529228	0.0734774	0.0491377	0.0585614	0.0404852	0.0856687	0.0493773	0.0619248	0.099253		36.5	0.163983	0.211115	0.177108	0.143945	0.131744	0.169667	0.170399	0.128904	0.0691132	0.0696227	0.0572353	0.0852195	0.2052	0.137173
36.75	0.177693	0.171222	0.15501	0.161762	0.163798	0.14737	0.121667	0.193446	0.148745	0.0823202	0.0654585	0.085247	0.109898	0.0455399	0.0747817	0.0410619	0.046427	0.0551174	0.112253	0.0453104	0.0650545	0.108056		36.75	0.178381	0.235357	0.170498	0.152846	0.135708	0.168665	0.177561	0.139331	0.0650941	0.0674321	0.0555874	0.0755881	0.228353	0.142339
37	0.167646	0.160705	0.1558	0.161477	0.132042	0.156131	0.113431	0.162145	0.150028	0.0739944	0.0639445	0.0901071	0.0994153	0.060218	0.0739661	0.047344	0.0376073	0.0699151	0.0744054	0.0496888	0.0665136	0.103168		37	0.182102	0.236897	0.154625	0.154233	0.132271	0.166573	0.183512	0.137619	0.0706746	0.070753	0.0577841	0.0652754	0.215284	0.140585
37.25	0.171045	0.151886	0.162605	0.16383	0.139378	0.17021	0.11152	0.130003	0.161098	0.0734623	0.0622622	0.0890587	0.0722828	0.0613148	0.0795877	0.0417135	0.0379633	0.0589502	0.0602303	0.0445248	0.0695393	0.100594		37.25	0.177793	0.215262	0.173611	0.137582	0.131889	0.176421	0.182484	0.140368	0.0720089	0.064568	0.0587884	0.0719814	0.199203	0.138612
37.5	0.173941	0.167393	0.174018	0.168609	0.162442	0.175702	0.115424	0.192666	0.143538	0.0753755	0.0704956	0.087606	0.0893537	0.0403346	0.0702896	0.0492649	0.0449504	0.0575112	0.0653802	0.0469901	0.0611306	0.106306		37.5	0.187306	0.218223	0.164103	0.148804	0.138453	0.167272	0.141617	0.145163	0.0727405	0.0645776	0.0575486	0.0737487	0.242928	0.140191
37.75	0.18121	0.15769	0.142926	0.172581	0.152796	0.169443	0.108079	0.144406	0.147984	0.072282	0.0672897	0.0881241	0.0857062	0.0466504	0.0602533	0.0524043	0.0320874	0.0665782	0.0766336	0.0436248	0.0588517	0.101314		37.75	0.164974	0.22344	0.165796	0.146683	0.140483	0.18181	0.196292	0.144642	0.064153	0.0643465	0.0610923	0.0788861	0.247643	0.144634
38	0.173408	0.160967	0.160257	0.174972	0.165966	0.172238	0.106645	0.161747	0.145971	0.0761226	0.0614542	0.0927539	0.0695259	0.0474263	0.0599118	0.0493024	0.0396896	0.0730503	0.0580675	0.0488461	0.0801438	0.103736		38	0.168298	0.226607	0.175446	0.141824	0.121027	0.160973	0.192807	0.141924	0.0681284	0.0690501	0.0570379	0.0825049	0.246519	0.142473
38.25	0.173569	0.154456	0.178909	0.176172	0.163118	0.160534	0.112597	0.175279	0.11689	0.0830558	0.068232	0.0868556	0.0729887	0.0476022	0.0712894	0.049496	0.0339591	0.0613767	0.0642401	0.0551843	0.0735633	0.103779		38.25	0.170624	0.189603	0.178922	0.133262	0.132658	0.172495	0.221573	0.142988	0.0686653	0.0712198	0.0542906	0.0856835	0.264797	0.145137
38.5	0.176375	0.169082	0.173265	0.167396	0.156456	0.186894	0.107731	0.173968	0.135738	0.0801077	0.0694046	0.0864805	0.0901898	0.0578112	0.0697722	0.050444	0.048976	0.0621406	0.0665206	0.058332	0.0883364	0.108353		38.5	0.184085	0.210625	0.174482	0.13793	0.137934	0.164558	0.174656	0.150457	0.0759373	0.0699559	0.0560677	0.0736124	0.225791	0.141238
38.75	0.184587	0.156821	0.164071	0.157241	0.173905	0.164287	0.113797	0.169072	0.137494	0.0765195	0.0717736	0.0989206	0.0961429	0.049551	0.0796688	0.0540678	0.036896	0.0643931	0.0888407	0.050127	0.0620376	0.107153		38.75	0.16059	0.225559	0.168049	0.150747	0.164361	0.165773	0.196002	0.154538	0.0787998	0.0763844	0.0563101	0.0894789	0.256564	0.149473
39	0.168244	0.139133	0.155826	0.150765	0.172398	0.146981	0.126231	0.144667	0.151789	0.0876793	0.0720065	0.113273	0.0728501	0.0387902	0.0719708	0.0486414	0.0461691	0.0888875	0.078961	0.052084	0.0873336	0.105461		39	0.16197	0.216803	0.170254	0.11724	0.157137	0.184363	0.172014	0.162405	0.0714833	0.0742759	0.0571513	0.0890893	0.210549	0.141903
39.25	0.170294	0.13812	0.146167	0.146177	0.162565	0.146681	0.0978411	0.140104	0.159634	0.0859678	0.0681153	0.108434	0.0423934	0.053682	0.076077	0.0525831	0.0414836	0.0611825	0.130284	0.0534711	0.0597313	0.101952		39.25	0.151893	0.243848	0.167251	0.143928	0.151487	0.176713	0.146127	0.15722	0.0759845	0.0712138	0.0597887	0.0841135	0.249863	0.144572
39.5	0.170334	0.14091	0.160815	0.159338	0.184626	0.140555	0.111651	0.158539	0.176941	0.0896562	0.0703844	0.0944566	0.0836921	0.0461578	0.0711011	0.046438	0.0431605	0.042263	0.0864845	0.0459493	0.0790161	0.104879		39.5	0.158521	0.229692	0.159422	0.118606	0.16692	0.160393	0.148714	0.15093	0.068056	0.066989	0.0609173	0.0900463	0.250398	0.140739
39.75	0.173442	0.154897	0.163209	0.158806	0.177099	0.151092	0.107011	0.123788	0.194579	0.0852464	0.0705635	0.0954703	0.0853143	0.051443	0.0725513	0.0508365	0.0549492	0.0549691	0.0788445	0.0521116	0.0732497	0.106165		39.75	0.171518	0.255216	0.179298	0.127195	0.152905	0.157402	0.163718	0.154907	0.0777667	0.0716769	0.0592394	0.084888	0.243665	0.146107
40	0.183666	0.154372	0.162453	0.167109	0.180494	0.169024	0.103946	0.125564	0.162004	0.0819621	0.0713238	0.109428	0.0792829	0.0518575	0.0701156	0.0551585	0.0538917	0.0708613	0.0827798	0.0602508	0.066522	0.107717		40	0.167863	0.232864	0.175404	0.141059	0.16622	0.178355	0.139205	0.158308	0.0731079	0.0727329	0.0595412	0.0851619	0.226594	0.14434
40.25	0.182959	0.158576	0.19487	0.166949	0.183926	0.14473	0.1037	0.136888	0.165679	0.0808284	0.0690729	0.0931821	0.0857345	0.052623	0.0857685	0.052211	0.0440948	0.0414257	0.0877537	0.0572021	0.0881691	0.108397		40.25	0.158679	0.21858	0.171605	0.1491	0.146341	0.16604	0.127188	0.158856	0.0784499	0.0719125	0.0596659	0.0778102	0.262199	0.142033
40.5	0.181535	0.157922	0.151492	0.167525	0.173236	0.14662	0.107086	0.15827	0.213824	0.093108	0.0628109	0.0854984	0.0885846	0.0658277	0.0639997	0.0440744	0.0504867	0.0511765	0.0676374	0.0563236	0.0700131	0.107479		40.5	0.154211	0.25705	0.179496	0.125193	0.18561	0.162151	0.15103	0.170223	0.0795695	0.0736792	0.057256	0.0792114	0.232723	0.146723
40.75	0.185428	0.160276	0.164578	0.180976	0.17597	0.172247	0.102144	0.174219	0.178703	0.0859271	0.0794908	0.112004	0.124243	0.0507308	0.068392	0.0423029	0.0409779	0.0456315	0.0980713	0.0523914	0.0622678	0.112237		40.75	0.173592	0.235423	0.187065	0.160867	0.169019	0.181502	0.152534	0.172897	0.0758895	0.0933522	0.0570193	0.0865222	0.262295	0.15446
41	0.181664	0.145629	0.162383	0.168867	0.199149	0.154792	0.121785	0.14215	0.192693	0.0881738	0.0665134	0.131412	0.0516682	0.0624671	0.0751071	0.0584026	0.0387557	0.0518509	0.102371	0.0530244	0.0645838	0.110164		41	0.162537	0.239917	0.188908	0.113235	0.17372	0.178427	0.147609	0.176881	0.0719145	0.0725384	0.0567081	0.0823993	0.231472	0.145867
41.25	0.189481	0.146541	0.169144	0.166296	0.192466	0.158697	0.111729	0.174703	0.194953	0.0814398	0.0725685	0.10532	0.050405	0.0534826	0.0754898	0.0370999	0.0404864	0.0768419	0.0789581	0.0458702	0.0692729	0.109107		41.25	0.175955	0.271739	0.182811	0.109899	0.171293	0.155837	0.116298	0.17638	0.0752146	0.0718903	0.0604506	0.0854608	0.204448	0.142898
41.5	0.17314	0.16304	0.153316	0.180712	0.195831	0.14968	0.0991353	0.192889	0.180446	0.0942015	0.0696247	0.117575	0.0876356	0.0448619	0.0549203	0.0441301	0.0409623	0.0590921	0.0647967	0.0422622	0.075359	0.108743		41.5	0.19595	0.230106	0.183051	0.111057	0.18039	0.169306	0.14879	0.172068	0.0744606	0.0718167	0.0640693	0.109832	0.198839	0.146903
41.75	0.167853	0.149801	0.165931	0.160755	0.238338	0.137594	0.112462	0.174911	0.174388	0.0937108	0.0656924	0.110295	0.0921068	0.063354	0.0609184	0.0528095	0.0480839	0.0636904	0.0362869	0.0396244	0.0632433	0.108183		41.75	0.181976	0.233598	0.171454	0.124614	0.157499	0.176471	0.144418	0.181207	0.0741856	0.0753723	0.0549804	0.100154	0.22672	0.146358
42	0.169793	0.151086	0.154734	0.151752	0.189437	0.13905	0.114581	0.137107	0.16807	0.0872477	0.0640946	0.124133	0.0678762	0.0659732	0.0559569	0.051658	0.0333917	0.0590103	0.0540166	0.0352341	0.0678615	0.102003		42	0.174784	0.236488	0.172322	0.115338	0.192184	0.172154	0.160378	0.175781	0.0684961	0.0739981	0.0580065	0.0745639	0.226667	0.146243
42.25	0.169031	0.147988	0.156403	0.149683	0.177728	0.139385	0.104895	0.120948	0.191633	0.0834953	0.0646982	0.22182	0.0906419	0.0573762	0.0735989	0.0446525	0.0360092	0.0885838	0.110591	0.0396527	0.0643924	0.111105		42.25	0.159076	0.229772	0.170199	0.114955	0.166315	0.155731	0.13175	0.180875	0.0750939	0.0766625	0.0608164	0.0838519	0.26723	0.144025
42.5	0.160708	0.145701	0.157417	0.150919	0.205663	0.134065	0.111713	0.148161	0.206212	0.0917014	0.06757	0.209876	0.0815025	0.0653015	0.0840344	0.0423279	0.0475449	0.059164	0.10619	0.0439301	0.0698032	0.113786		42.5	0.171145	0.252756	0.176354	0.121218	0.176662	0.165507	0.139981	0.173817	0.0710597	0.0741697	0.06303	0.0929796	0.232908	0.147045
42.75	0.176394	0.145243	0.171873	0.154361	0.2201	0.126186	0.109366	0.114528	0.200021	0.0873623	0.0691617	0.234973	0.0560892	0.0585786	0.0699133	0.0551328	0.0512312	0.0554559	0.0709988	0.0426729	0.0612359	0.110994		42.75	0.189246	0.259631	0.183914	0.101675	0.178334	0.1585	0.164249	0.170214	0.0765416	0.0700658	0.0617036	0.102737	0.232992	0.149985
43	0.163278	0.154704	0.161409	0.155043	0.225443	0.129586	0.104706	0.100425	0.181591	0.092768	0.0740386	0.249624	0.103903	0.0432519	0.0735294	0.0567918	0.0490234	0.0660127	0.0699269	0.061521	0.0565845	0.113008		43	0.175807	0.250637	0.19046	0.136794	0.195555	0.160809	0.136151	0.187627	0.0801951	0.0801389	0.0693782	0.106957	0.24633	0.155141
43.25	0.166704	0.148355	0.143422	0.154626	0.20225	0.129034	0.100858	0.106887	0.188885	0.0905293	0.0745685	0.229254	0.0871599	0.0610556	0.0705432	0.0435544	0.0455835	0.0605054	0.0611348	0.060788	0.0725371	0.10944		43.25	0.18415	0.24626	0.177533	0.116612	0.187741	0.157299	0.15386	0.177333	0.076823	0.0725152	0.0663763	0.104612	0.253027	0.151857
43.5	0.169639	0.142806	0.14462	0.14649	0.231896	0.124502	0.0824471	0.135978	0.188451	0.0952013	0.065985	0.222493	0.0654218	0.0523657	0.0804809	0.0527035	0.0422136	0.0834717	0.117981	0.0383246	0.0710234	0.112119		43.5	0.162662	0.268423	0.176684	0.120215	0.203267	0.152588	0.166133	0.180567	0.0837068	0.0763848	0.0530902	0.0775051	0.253695	0.151917
43.75	0.176197	0.134795	0.158737	0.157889	0.21242	0.136024	0.0847848	0.0915034	0.193016	0.0928809	0.0648398	0.214438	0.159083	0.0549102	0.0674396	0.0643226	0.0440733	0.0536565	0.0895402	0.0500668	0.0771418	0.113227		43.75	0.185655	0.260602	0.172217	0.14139	0.182906	0.157549	0.162923	0.182065	0.0774573	0.0766196	0.0723132	0.103366	0.242432	0.155192
44	0.164238	0.136909	0.145783	0.148149	0.218188	0.133975	0.0927928	0.136397	0.192715	0.090606	0.0700096	0.263479	0.0817797	0.0443479	0.0722165	0.0772466	0.0404765	0.0932683	0.10596	0.04968	0.0752193	0.115878		44	0.166068	0.265599	0.180529	0.123309	0.196073	0.145465	0.138167	0.185895	0.0756583	0.072932	0.0656256	0.0861991	0.256429	0.150611
44.25	0.162701	0.143056	0.127253	0.15586	0.204703	0.113191	0.116381	0.117363	0.208659	0.0885616	0.0691203	0.237206	0.0902406	0.0510213	0.0739804	0.0495446	0.0402767	0.0731523	0.0528216	0.0387152	0.075524	0.109016		44.25	0.166812	0.263935	0.176013	0.106237	0.177521	0.147799	0.143395	0.182336	0.084529	0.0769172	0.0625404	0.0836409	0.270404	0.149391
44.5	0.171448	0.150248	0.150226	0.154812	0.215068	0.140334	0.105054	0.137416	0.225407	0.088289	0.063223	0.256211	0.104565	0.0483932	0.0807749	0.0597329	0.0536354	0.0639662	0.0437342	0.0435896	0.0701769	0.115538		44.5	0.170134	0.27317	0.175511	0.123142	0.176219	0.157331	0.171878	0.17632	0.0820257	0.0791726	0.0618972	0.104902	0.235106	0.152831
44.75	0.170087	0.157281	0.140541	0.149847	0.200923	0.137818	0.109135	0.106733	0.198683	0.0923222	0.0711739	0.266556	0.0963762	0.0492013	0.071408	0.0517806	0.0421616	0.0664027	0.0952584	0.0418437	0.0712958	0.113658		44.75	0.160936	0.262056	0.18371	0.136227	0.176989	0.16503	0.126157	0.185851	0.0781568	0.0728937	0.0646932	0.0931522	0.24657	0.150186
45	0.171509	0.145185	0.145784	0.155385	0.202779	0.128554	0.0997784	0.151733	0.20501	0.0862305	0.0734703	0.247704	0.081905	0.0519445	0.0654706	0.0544513	0.0459942	0.0518566	0.0543444	0.0443166	0.0766168	0.11143		45	0.166466	0.263181	0.18507	0.0968147	0.175127	0.17764	0.150737	0.184351	0.0811158	0.0775332	0.0627502	0.0962035	0.235261	0.150173
45.25	0.175755	0.149323	0.16051	0.170981	0.227048	0.150312	0.117398	0.140193	0.215008	0.0910256	0.0718159	0.213115	0.10121	0.0601207	0.0813867	0.0650598	0.05763	0.0550089	0.104155	0.0544721	0.0655615	0.120338		45.25	0.171666	0.252753	0.187041	0.132609	0.187407	0.165818	0.178534	0.178397	0.081995	0.0826648	0.0652046	0.107001	0.201046	0.153241
45.5	0.17459	0.157594	0.175768	0.159698	0.203468	0.13458	0.112801	0.137945	0.183764	0.0962637	0.0681694	0.132064	0.103052	0.0500379	0.0647061	0.0588973	0.0411411	0.103729	0.0995333	0.0400007	0.0700789	0.112756		45.5	0.163928	0.254806	0.184273	0.135765	0.193079	0.170828	0.142299	0.190241	0.0849717	0.0804784	0.0533286	0.107678	0.229607	0.153176
45.75	0.164284	0.14708	0.17728	0.15708	0.226213	0.145842	0.0865544	0.121136	0.209453	0.0895786	0.0673274	0.206989	0.163423	0.0553807	0.0687422	0.0590194	0.0482196	0.0532988	0.106009	0.0321124	0.0935671	0.118028		45.75	0.193773	0.280824	0.191286	0.125943	0.173967	0.169341	0.174385	0.165402	0.0840639	0.0838732	0.0576227	0.113964	0.229897	0.157257
46	0.182626	0.153659	0.166393	0.158982	0.276624	0.153731	0.0909064	0.125101	0.190644	0.0870782	0.0642287	0.207228	0.0865837	0.0456071	0.0610319	0.0670956	0.0447223	0.0683468	0.0853417	0.0435104	0.0723985	0.115802		46	0.168738	0.284473	0.202862	0.125987	0.176564	0.169176	0.130518	0.174332	0.0818427	0.0750417	0.0616844	0.100898	0.239304	0.153186
46.25	0.183837	0.160265	0.163995	0.16548	0.230314	0.145459	0.110339	0.151051	0.197041	0.0907144	0.0685553	0.186762	0.092218	0.0468863	0.0652105	0.0643464	0.0453191	0.0859339	0.0751927	0.0390404	0.0585746	0.115549		46.25	0.185983	0.273935	0.189359	0.127427	0.188189	0.160419	0.134728	0.174589	0.0832272	0.0737894	0.0581602	0.100282	0.225493	0.151968
46.5	0.192627	0.148965	0.152879	0.175597	0.26584	0.169003	0.121354	0.134915	0.175758	0.0915038	0.0677649	0.0885507	0.129237	0.05833	0.0714482	0.0689315	0.0397112	0.0623627	0.0451407	0.0383665	0.0700211	0.112777		46.5	0.180459	0.255424	0.205108	0.140886	0.2119	0.168785	0.174398	0.177735	0.0931188	0.0797165	0.0615366	0.0929126	0.241469	0.160265
46.75	0.182465	0.141256	0.146351	0.167519	0.246866	0.156311	0.0961406	0.181229	0.191431	0.0893003	0.0658154	0.0946907	0.0888873	0.0437909	0.0742482	0.0731936	0.0387035	0.0558426	0.0680371	0.038274	0.0508153	0.109103		46.75	0.189733	0.275105	0.194178	0.149228	0.195925	0.174779	0.157916	0.184723	0.0865318	0.0798473	0.0623177	0.0771008	0.21189	0.156867
47	0.183538	0.153155	0.17073	0.170955	0.280599	0.140456	0.103329	0.146712	0.19164	0.0905763	0.0671596	0.115278	0.148575	0.05304	0.0715139	0.0664735	0.0492959	0.0549498	0.0629485	0.0439695	0.0696694	0.115932		47	0.18103	0.26375	0.183929	0.136534	0.177015	0.168459	0.151489	0.182436	0.087195	0.0821229	0.0561017	0.0978411	0.228332	0.153556
47.25	0.183773	0.156692	0.171214	0.179928	0.228711	0.138567	0.111037	0.121101	0.171434	0.0830459	0.0701676	0.109238	0.160592	0.0496635	0.0734812	0.0683574	0.0544288	0.0521656	0.0592336	0.0389452	0.0592249	0.111476		47.25	0.162387	0.271599	0.203037	0.147109	0.174171	0.178226	0.141819	0.180936	0.084933	0.0813034	0.0571774	0.0769199	0.213006	0.15174
47.5	0.180209	0.153363	0.156478	0.170632	0.266406	0.157377	0.130086	0.162398	0.179444	0.0954328	0.0684844	0.114193	0.112891	0.0599067	0.0704697	0.0596551	0.0551745	0.0681692	0.0780042	0.0398128	0.0958451	0.11783		47.5	0.177418	0.240124	0.174996	0.143451	0.204276	0.179463	0.119176	0.180395	0.0836289	0.0795562	0.0645544	0.0949271	0.218759	0.150825
47.75	0.179466	0.15263	0.148017	0.161596	0.244185	0.147214	0.105857	0.153028	0.213115	0.098132	0.0707246	0.0894041	0.094797	0.0712502	0.0747098	0.0586226	0.0448393	0.0780846	0.0856021	0.0400774	0.0614411	0.11299		47.75	0.166395	0.264752	0.20005	0.140521	0.189239	0.196234	0.150251	0.177581	0.0880314	0.0860374	0.0625642	0.106341	0.211243	0.156865
48	0.185797	0.14892	0.165354	0.178179	0.256074	0.155859	0.11759	0.173386	0.219606	0.08846	0.0638866	0.0986157	0.108555	0.0578084	0.0638708	0.0470194	0.0440956	0.0456763	0.103302	0.0424869	0.0593773	0.115425		48	0.175616	0.249517	0.209561	0.145126	0.187021	0.176289	0.162957	0.188682	0.0876367	0.0819038	0.0607132	0.0899145	0.207692	0.155587
48.25	0.174913	0.153986	0.151686	0.165264	0.239901	0.148704	0.10731	0.136482	0.223919	0.100695	0.0759166	0.106114	0.115419	0.0488442	0.0728535	0.0625725	0.0455217	0.083535	0.0630515	0.0490745	0.0643032	0.113813		48.25	0.177422	0.251137	0.197345	0.129446	0.206571	0.190581	0.187002	0.191423	0.0894617	0.0808684	0.063372	0.097574	0.188803	0.15777
48.5	0.186748	0.13414	0.152729	0.163288	0.221908	0.147484	0.125519	0.178654	0.250084	0.0976639	0.0666999	0.0945021	0.111463	0.0522034	0.0753287	0.0675161	0.0484068	0.0676679	0.0955519	0.0486636	0.0906547	0.117946		48.5	0.173801	0.258285	0.184832	0.162478	0.188826	0.156407	0.160716	0.179358	0.0939959	0.0777358	0.061536	0.115074	0.187391	0.15388
48.75	0.179738	0.153191	0.134186	0.169792	0.28229	0.141878	0.125013	0.147325	0.227641	0.0923743	0.0686505	0.103412	0.113953	0.0359323	0.0743118	0.0622289	0.0373404	0.082156	0.0868123	0.0445696	0.0767847	0.11617		48.75	0.19896	0.231603	0.210848	0.141176	0.215835	0.179171	0.206122	0.190645	0.0884928	0.0815556	0.0626026	0.105986	0.204037	0.162849
49	0.186701	0.137451	0.143827	0.161169	0.262671	0.132789	0.117122	0.160119	0.207842	0.0975645	0.0756495	0.105012	0.0977186	0.0616931	0.0709557	0.0814389	0.0509999	0.0646471	0.125141	0.04435	0.0743967	0.117107		49	0.170306	0.252862	0.189314	0.142331	0.214347	0.161623	0.16786	0.194408	0.097396	0.0812078	0.057071	0.0966296	0.217147	0.157116
49.25	0.172593	0.135483	0.14097	0.150885	0.224909	0.15186	0.116878	0.165078	0.219293	0.0949773	0.0776243	0.108206	0.110303	0.0588717	0.0747851	0.0644449	0.0429053	0.0604783	0.0717338	0.0527985	0.0816785	0.113179		49.25	0.156976	0.296741	0.174747	0.141014	0.21324	0.153945	0.192552	0.161006	0.0868351	0.0797808	0.0614822	0.105179	0.177771	0.153944
49.5	0.153151	0.133498	0.136252	0.155722	0.218683	0.153482	0.108898	0.151743	0.222627	0.097982	0.0754287	0.0904138	0.126676	0.0644626	0.0829955	0.0640112	0.0493589	0.0491961	0.0885644	0.0377784	0.0963199	0.11225		49.5	0.1794	0.273493	0.19195	0.154478	0.214396	0.169463	0.147871	0.160833	0.0888915	0.0798075	0.0549525	0.0920307	0.180473	0.152926
49.75	0.17534	0.140844	0.172022	0.161582	0.267852	0.148512	0.11365	0.148042	0.220154	0.0871389	0.0790115	0.096447	0.104383	0.0545431	0.074581	0.0632991	0.0472001	0.0951678	0.0773826	0.0410814	0.0680524	0.116014		49.75	0.177573	0.282717	0.199469	0.164281	0.226197	0.17491	0.189359	0.162075	0.087499	0.0826041	0.055749	0.0854264	0.244009	0.16399
50	0.170291	0.155054	0.144641	0.17728	0.266194	0.148304	0.104567	0.162228	0.188235	0.0927519	0.0781006	0.0880476	0.1505	0.0626024	0.0690533	0.0693495	0.0338704	0.0739323	0.0967634	0.0357304	0.0749589	0.116307		50	0.199961	0.280128	0.183337	0.153464	0.218977	0.180602	0.201588	0.150005	0.0814796	0.0844085	0.0602693	0.0980146	0.22017	0.162493
50.25	0.181067	0.14625	0.173997	0.176866	0.262834	0.156559	0.131856	0.175513	0.217378	0.101298	0.0834736	0.103124	0.119657	0.0686304	0.0879359	0.0577337	0.0310163	0.048327	0.0654119	0.0424391	0.0771653	0.119454		50.25	0.192355	0.253105	0.19152	0.175705	0.221744	0.159774	0.181656	0.15914	0.083777	0.0843906	0.0671356	0.0921495	0.225158	0.160585
50.5	0.193932	0.15245	0.165022	0.178164	0.232443	0.159265	0.135907	0.165364	0.200273	0.104995	0.0775666	0.0963832	0.13805	0.0789878	0.0883175	0.063134	0.0332407	0.0710733	0.103868	0.0458357	0.0855027	0.12237		50.5	0.196198	0.238378	0.206065	0.16181	0.222928	0.186342	0.212708	0.164881	0.0867388	0.08895	0.0650276	0.120666	0.202204	0.165607
50.75	0.174626	0.153921	0.174643	0.177303	0.273304	0.155519	0.118927	0.155863	0.181508	0.100684	0.0754046	0.0879568	0.15435	0.0505955	0.0849459	0.0511893	0.0443853	0.0601375	0.113907	0.0520211	0.0615344	0.119177		50.75	0.191382	0.258303	0.209483	0.140674	0.2535	0.185055	0.222303	0.165987	0.0859097	0.089542	0.0629515	0.106323	0.218933	0.168488
51	0.180597	0.140207	0.162221	0.182978	0.319818	0.156071	0.124332	0.233784	0.159254	0.104674	0.0815044	0.0891553	0.116453	0.0579218	0.0766099	0.075396	0.0408771	0.0758122	0.0858395	0.040923	0.0792781	0.123034		51	0.180742	0.231441	0.202441	0.162761	0.188719	0.181597	0.184056	0.169225	0.0807464	0.0841408	0.0642777	0.104601	0.239666	0.15957
51.25	0.195228	0.166993	0.153062	0.192394	0.273075	0.152519	0.149461	0.236644	0.149482	0.100286	0.0786531	0.106759	0.117187	0.0656742	0.0787038	0.0701755	0.0324612	0.0818749	0.10792	0.0519077	0.0854933	0.125998		51.25	0.201881	0.220774	0.194023	0.189971	0.190699	0.208542	0.19125	0.166797	0.0793533	0.0891246	0.0745069	0.0949132	0.247817	0.165358
51.5	0.179148	0.140232	0.159891	0.171248	0.267323	0.136999	0.135547	0.180235	0.160375	0.102508	0.0747018	0.108446	0.123844	0.0649641	0.0836868	0.0559936	0.0377925	0.085195	0.0958265	0.0515992	0.0739985	0.11855		51.5	0.186422	0.233763	0.168572	0.155924	0.204381	0.195735	0.204931	0.178033	0.0852744	0.0833148	0.0713224	0.0875891	0.211873	0.15901
51.75	0.170584	0.151435	0.161233	0.166766	0.297299	0.128347	0.111343	0.157515	0.189317	0.103333	0.0751117	0.103081	0.0971022	0.0623186	0.0745716	0.0702027	0.0404882	0.0772659	0.091962	0.061123	0.0899702	0.118113		51.75	0.188307	0.288926	0.200018	0.167352	0.225338	0.189164	0.166427	0.175191	0.0905346	0.08875	0.0692992	0.100097	0.201344	0.165442
52	0.156409	0.144787	0.153306	0.151324	0.28146	0.124096	0.110945	0.141995	0.174923	0.0978803	0.0783705	0.090708	0.210384	0.0458833	0.10548	0.0885547	0.0527478	0.103425	0.0668142	0.0563378	0.082161	0.119904		52	0.173711	0.271093	0.176352	0.157218	0.210215	0.171303	0.181343	0.177381	0.0943431	0.0965462	0.0700372	0.0895414	0.233516	0.161738
52.25	0.155419	0.128092	0.142186	0.154683	0.264577	0.117937	0.120946	0.148962	0.192365	0.106498	0.0823439	0.0860261	0.146461	0.073633	0.0757658	0.0689581	0.0349191	0.0947873	0.114632	0.056379	0.107517	0.117766		52.25	0.176092	0.285729	0.187796	0.138481	0.229417	0.145824	0.184241	0.161568	0.0926779	0.087124	0.065982	0.0983155	0.207607	0.158527
52.5	0.14341	0.130371	0.142794	0.144849	0.250524	0.105386	0.104081	0.111475	0.216245	0.103772	0.0860305	0.089496	0.120763	0.0590341	0.10122	0.0655902	0.046025	0.0701391	0.083576	0.053668	0.0811358	0.10998		52.5	0.180137	0.27736	0.198527	0.158896	0.195359	0.171693	0.209714	0.155613	0.0773077	0.0862238	0.0689849	0.0688338	0.227138	0.159676
52.75	0.163271	0.118983	0.100168	0.136113	0.26752	0.12835	0.102026	0.137462	0.222382	0.102805	0.0858053	0.0899678	0.0949172	0.0581517	0.0829443	0.0677674	0.0436833	0.0942688	0.0558915	0.0553488	0.098601	0.10983		52.75	0.195469	0.263484	0.184506	0.165699	0.199771	0.16085	0.176558	0.156292	0.0856984	0.0840729	0.0657566	0.0804093	0.24065	0.158401
53	0.15745	0.128286	0.122221	0.160712	0.300822	0.124942	0.112296	0.145611	0.196564	0.104588	0.0817092	0.112702	0.14792	0.0670879	0.0960127	0.0608751	0.037925	0.11938	0.0975753	0.0473867	0.102234	0.120205		53	0.164173	0.278858	0.184664	0.162535	0.215129	0.161206	0.207565	0.158807	0.0869246	0.0838489	0.0691349	0.0904795	0.216821	0.160011
53.25	0.174835	0.132193	0.140023	0.165651	0.284203	0.135263	0.133985	0.199207	0.211703	0.103195	0.0918277	0.115096	0.111174	0.0598372	0.100201	0.0654169	0.0321952	0.0867291	0.108829	0.0460473	0.0752689	0.122518		53.25	0.183631	0.279669	0.186271	0.167619	0.223907	0.155393	0.195186	0.155212	0.0939133	0.0853667	0.067421	0.102747	0.226516	0.163296
53.5	0.183774	0.145887	0.129708	0.160224	0.32155	0.130748	0.144007	0.203491	0.183662	0.0972743	0.0815075	0.0938463	0.134274	0.0543413	0.0986472	0.064609	0.0369608	0.107407	0.0863874	0.0508165	0.0820833	0.123391		53.5	0.175472	0.309278	0.183057	0.173078	0.237659	0.164215	0.211583	0.154719	0.0857553	0.0834985	0.067891	0.105177	0.215708	0.166699
53.75	0.171968	0.152291	0.132469	0.182367	0.252672	0.133999	0.129899	0.14148	0.208918	0.102975	0.0853066	0.0949141	0.117268	0.0658958	0.0901027	0.0709249	0.0400207	0.0632847	0.104711	0.0495731	0.0816301	0.117746		53.75	0.177906	0.317596	0.197063	0.162111	0.228327	0.191382	0.16084	0.164799	0.0836945	0.08605	0.0657172	0.0959761	0.230636	0.166315
54	0.190038	0.15672	0.160694	0.176487	0.283039	0.126699	0.147335	0.153795	0.194815	0.105395	0.0838559	0.0858622	0.0697443	0.0503118	0.102511	0.0652804	0.0390293	0.05542	0.121054	0.047926	0.0910034	0.119382		54	0.174928	0.322272	0.208307	0.169942	0.219796	0.175696	0.155744	0.165377	0.0887485	0.0861172	0.0622101	0.108147	0.234237	0.16704
54.25	0.17639	0.164387	0.15567	0.176918	0.317625	0.122061	0.141378	0.165608	0.184572	0.0991775	0.0865596	0.109476	0.105216	0.0658232	0.092199	0.0613225	0.0294145	0.0766353	0.109607	0.0511208	0.094955	0.123148		54.25	0.185177	0.314002	0.195379	0.17022	0.225586	0.176146	0.179428	0.157356	0.0928297	0.0918564	0.0654564	0.104148	0.224345	0.167841
54.5	0.166309	0.162036	0.113998	0.167478	0.284218	0.135061	0.128979	0.139818	0.201583	0.108063	0.0820994	0.112613	0.102418	0.0789885	0.0888699	0.0628607	0.0418054	0.107263	0.0981294	0.0537153	0.0905772	0.120328		54.5	0.199097	0.323948	0.205958	0.171774	0.210063	0.16246	0.189304	0.162956	0.0917037	0.0859668	0.0648283	0.098356	0.242879	0.169946
54.75	0.168861	0.141713	0.141789	0.15961	0.267305	0.134752	0.127234	0.206043	0.181729	0.105358	0.0787936	0.0887707	0.0644373	0.085035	0.0819073	0.0628221	0.0318859	0.0857632	0.154087	0.0531832	0.0792521	0.119063		54.75	0.193655	0.324749	0.186592	0.192775	0.208398	0.16485	0.221972	0.164983	0.0874101	0.0842961	0.0720332	0.110764	0.23032	0.172523
55	0.185786	0.145741	0.128127	0.164517	0.263627	0.136266	0.134013	0.164506	0.18887	0.107309	0.0807985	0.0751518	0.104299	0.0575307	0.0796755	0.0600454	0.0460162	0.0755218	0.0906815	0.0603234	0.0891119	0.116091		55	0.199088	0.353296	0.200481	0.183798	0.200789	0.165389	0.195791	0.17246	0.0848982	0.08382	0.0670006	0.108594	0.21692	0.171717
55.25	0.185211	0.160226	0.128294	0.177467	0.310191	0.147405	0.132273	0.127709	0.179022	0.100239	0.0772332	0.1043	0.142739	0.0696592	0.0916624	0.0450424	0.0275915	0.0920684	0.0959935	0.0594416	0.0947924	0.12136		55.25	0.200077	0.334404	0.197708	0.177032	0.201831	0.181856	0.217855	0.17192	0.0889731	0.092408	0.0769555	0.0865134	0.215208	0.172518
55.5	0.182532	0.152092	0.124106	0.168929	0.283344	0.140052	0.133881	0.154675	0.166522	0.100199	0.0840299	0.0949067	0.110632	0.0627208	0.0805267	0.0588584	0.0387148	0.0868968	0.128559	0.0631566	0.0734393	0.118513		55.5	0.199337	0.338045	0.179541	0.169101	0.214674	0.17444	0.234108	0.176822	0.0821623	0.0881107	0.0767059	0.0853491	0.242411	0.173908
55.75	0.185829	0.136232	0.128943	0.151473	0.286368	0.131388	0.144091	0.149514	0.169249	0.0975205	0.0842802	0.0901128	0.120527	0.06647	0.0840709	0.0645622	0.0470775	0.0594041	0.101875	0.058447	0.0718574	0.115681		55.75	0.200681	0.368826	0.189391	0.196066	0.2342	0.171755	0.178125	0.179404	0.0981167	0.0912157	0.0763217	0.101769	0.205257	0.176241
56	0.184082	0.144569	0.132524	0.158765	0.358378	0.122895	0.1235	0.168954	0.156541	0.106365	0.0874705	0.097501	0.0758647	0.0685809	0.0749062	0.0703205	0.0318344	0.0585471	0.0636206	0.0550712	0.0995898	0.116185		56	0.220892	0.316086	0.181042	0.198834	0.212094	0.166994	0.223652	0.180079	0.0873586	0.0915908	0.0728565	0.0936056	0.203487	0.172967
56.25	0.171284	0.14298	0.0980588	0.155011	0.29206	0.128508	0.127883	0.209742	0.205925	0.106738	0.0802225	0.0995093	0.11059	0.0722789	0.0899819	0.0648947	0.0365383	0.091563	0.0695008	0.0578577	0.0814575	0.118695		56.25	0.20319	0.33788	0.198288	0.202826	0.218035	0.156274	0.217293	0.172954	0.0992799	0.0856443	0.069304	0.117517	0.238435	0.178225
56.5	0.180563	0.14559	0.110893	0.150184	0.271	0.129845	0.12091	0.23119	0.174021	0.102875	0.0858662	0.103464	0.127869	0.0670109	0.0888097	0.0608511	0.0261303	0.0750545	0.104779	0.0503381	0.0887968	0.118859		56.5	0.237124	0.338274	0.200187	0.203509	0.234955	0.158699	0.220871	0.186805	0.0967929	0.0905408	0.0698213	0.103339	0.219412	0.181564
56.75	0.174961	0.135591	0.104164	0.153061	0.306978	0.139859	0.153604	0.175623	0.200175	0.110213	0.0860325	0.11355	0.110407	0.0631705	0.0961057	0.0680089	0.0286966	0.08543	0.045129	0.0508705	0.0827434	0.118303		56.75	0.213588	0.338379	0.206786	0.19071	0.211627	0.167239	0.196129	0.186683	0.0936541	0.0939785	0.0805521	0.126111	0.251039	0.181268
57	0.18681	0.147601	0.109299	0.159658	0.279992	0.147759	0.134598	0.189617	0.180342	0.111136	0.0855311	0.105364	0.0985514	0.0642668	0.0791291	0.0793653	0.0549984	0.0756429	0.0983061	0.0551199	0.0889624	0.120574		57	0.238165	0.34536	0.181212	0.183669	0.209743	0.167123	0.20254	0.182611	0.0888356	0.0924444	0.0694646	0.116069	0.21119	0.176033
57.25	0.175008	0.142631	0.117935	0.169703	0.313491	0.140985	0.142105	0.203937	0.179083	0.118458	0.0822338	0.0935074	0.0786092	0.0772689	0.0926418	0.0717588	0.0353474	0.073724	0.0637447	0.0542263	0.0964578	0.120136		57.25	0.22729	0.361851	0.197618	0.189926	0.222779	0.178969	0.258277	0.183555	0.0960178	0.0875893	0.0705274	0.108678	0.247796	0.18699
57.5	0.190562	0.152713	0.110576	0.174225	0.317787	0.154023	0.168796	0.238449	0.201831	0.10554	0.0909297	0.100246	0.12591	0.0633815	0.081191	0.0656404	0.0348214	0.0675641	0.0670567	0.0598887	0.097607	0.127083		57.5	0.235122	0.348402	0.190759	0.219757	0.215555	0.165392	0.208785	0.187954	0.0966825	0.0826301	0.0742407	0.101077	0.239302	0.181974
57.75	0.175655	0.14084	0.108451	0.167696	0.303025	0.137488	0.152352	0.176087	0.186874	0.106652	0.0829596	0.0986736	0.138492	0.0840637	0.0849463	0.0706087	0.0367026	0.0609723	0.0433474	0.0569291	0.0876661	0.119071		57.75	0.240967	0.358166	0.181415	0.179546	0.211856	0.183179	0.277575	0.188839	0.0961634	0.0921626	0.076105	0.112451	0.227553	0.186614
58	0.181159	0.133521	0.0868809	0.156628	0.29611	0.153604	0.153498	0.19393	0.184028	0.112005	0.0970257	0.107443	0.129352	0.0801822	0.0983785	0.0649706	0.0382744	0.0623517	0.0892652	0.076903	0.0982794	0.123514		58	0.228648	0.350353	0.176782	0.196979	0.210702	0.163293	0.194145	0.183515	0.100294	0.0843343	0.082929	0.0966039	0.239873	0.177573
58.25	0.171571	0.145034	0.0922826	0.16912	0.304734	0.140786	0.156428	0.184746	0.180487	0.11038	0.0896507	0.0931446	0.166959	0.0732823	0.0872052	0.0602078	0.0339679	0.0869484	0.108654	0.0724204	0.0826607	0.124318		58.25	0.225977	0.329472	0.193159	0.185681	0.249644	0.175554	0.213027	0.188154	0.101151	0.0919065	0.0758645	0.109659	0.261972	0.184709
58.5	0.177789	0.145957	0.101264	0.156447	0.330227	0.135936	0.149973	0.192256	0.186963	0.105936	0.0861671	0.0913622	0.107941	0.0684485	0.0658867	0.0697378	0.0375566	0.111067	0.0924059	0.0773429	0.101801	0.123451		58.5	0.223011	0.371209	0.179476	0.180608	0.22401	0.168139	0.233185	0.190067	0.106948	0.094986	0.0826169	0.103475	0.243045	0.184675
58.75	0.172424	0.139513	0.10064	0.167131	0.323338	0.15524	0.150921	0.209655	0.212781	0.112115	0.0821163	0.0944055	0.161677	0.0778493	0.08422	0.0687086	0.0308344	0.115494	0.0828154	0.0679402	0.0808269	0.128126		58.75	0.236706	0.347	0.195118	0.184909	0.219686	0.17142	0.267522	0.193688	0.107165	0.0974192	0.0714171	0.109232	0.264211	0.189653
59	0.19222	0.143415	0.115179	0.170504	0.304834	0.15598	0.144772	0.197398	0.184466	0.109388	0.0853679	0.133351	0.0916985	0.0885561	0.082894	0.0621661	0.0387898	0.110067	0.0869886	0.0601102	0.0867926	0.125949		59	0.23681	0.312628	0.203752	0.214481	0.243585	0.176956	0.256206	0.206282	0.10091	0.0906162	0.0864034	0.121857	0.25636	0.192834
59.25	0.18396	0.136589	0.078955	0.156008	0.26848	0.147217	0.13734	0.194151	0.184249	0.11441	0.0836043	0.114572	0.0932073	0.0709323	0.104496	0.0604265	0.0274908	0.0754085	0.0502276	0.0516203	0.0822232	0.115027		59.25	0.270709	0.328943	0.190428	0.232142	0.225302	0.183539	0.230244	0.198375	0.0992264	0.0973111	0.0764949	0.114624	0.25434	0.192437
59.5	0.182235	0.145812	0.10803	0.157408	0.345875	0.151873	0.137246	0.178195	0.184937	0.122781	0.081362	0.134356	0.0946612	0.0831459	0.0909945	0.0744782	0.0243579	0.0583883	0.0892816	0.0711946	0.100525	0.124626		59.5	0.2417	0.301153	0.183416	0.204625	0.227153	0.172374	0.271162	0.209781	0.105642	0.0975131	0.0789796	0.126338	0.218068	0.187531
59.75	0.189886	0.136045	0.0968965	0.158074	0.333858	0.145209	0.148253	0.201447	0.170321	0.113695	0.0832465	0.106301	0.108128	0.070316	0.101093	0.0854953	0.0371514	0.101971	0.0971725	0.0666932	0.0895734	0.125754		59.75	0.251705	0.350315	0.187842	0.215769	0.222036	0.166639	0.168211	0.219164	0.101909	0.0876167	0.0752598	0.132964	0.268543	0.188306
60	0.175173	0.143563	0.108752	0.161489	0.321808	0.177837	0.149337	0.18444	0.167537	0.120224	0.091031	0.108424	0.0726774	0.0729517	0.0903835	0.0514114	0.0426382	0.0859702	0.0700302	0.0766829	0.0867194	0.121861		60	0.251485	0.337749	0.181785	0.203296	0.237393	0.191677	0.244928	0.222518	0.112269	0.0942604	0.0747482	0.149721	0.264828	0.197435
60.25	0.189201	0.143017	0.0935637	0.158239	0.330897	0.151454	0.13345	0.212708	0.178937	0.113934	0.0896712	0.123817	0.119479	0.0617729	0.0857943	0.0606219	0.0336913	0.0866198	0.124122	0.0857425	0.0839489	0.126699		60.25	0.249596	0.315275	0.194556	0.228713	0.228148	0.1663	0.229754	0.207982	0.102224	0.0923373	0.0834146	0.0976039	0.261963	0.189067
60.5	0.181918	0.137202	0.108367	0.162492	0.299839	0.144242	0.146508	0.249033	0.179384	0.121857	0.0923219	0.111205	0.0811267	0.0795993	0.066724	0.0676966	0.0491958	0.08265	0.075531	0.065673	0.110702	0.124441		60.5	0.260187	0.305748	0.187027	0.230181	0.242491	0.168174	0.244822	0.207792	0.10135	0.0931971	0.0770742	0.0915486	0.247668	0.18902
60.75	0.18673	0.142432	0.104533	0.154778	0.331413	0.169089	0.163536	0.196339	0.185727	0.121026	0.0945674	0.0934409	0.107212	0.0740333	0.107207	0.0643098	0.0416944	0.135409	0.0708107	0.0680637	0.106328	0.129461		60.75	0.240762	0.334026	0.186072	0.219768	0.216396	0.183697	0.226838	0.20824	0.101155	0.0999056	0.0789414	0.103513	0.250209	0.188425
61	0.19694	0.144118	0.11839	0.158593	0.295189	0.156448	0.162275	0.227029	0.163473	0.115764	0.0875395	0.122087	0.149899	0.0692604	0.0896941	0.074325	0.0340828	0.105144	0.0897785	0.0518828	0.0996391	0.129122		61	0.246071	0.347781	0.196339	0.205172	0.227614	0.174008	0.252287	0.156755	0.0845998	0.10025	0.0689652	0.075903	0.234828	0.182352
61.25	0.189549	0.134819	0.0938466	0.15868	0.338016	0.147312	0.173056	0.163599	0.198052	0.101401	0.0871699	0.125321	0.115796	0.0815512	0.0769601	0.0703013	0.041992	0.0650775	0.0860735	0.0753501	0.0842332	0.124198		61.25	0.241271	0.362219	0.1766	0.214705	0.228979	0.178858	0.23199	0.16882	0.0920197	0.0959308	0.0670818	0.10295	0.249529	0.185458
61.5	0.180649	0.140129	0.100516	0.146864	0.284717	0.123267	0.161203	0.221416	0.187855	0.107598	0.0940019	0.114699	0.0534688	0.0646682	0.0931811	0.073229	0.0431362	0.0985857	0.144643	0.0663665	0.130915	0.125291		61.5	0.277341	0.345556	0.171773	0.18502	0.224714	0.161352	0.225203	0.164249	0.094302	0.100944	0.0778599	0.0857838	0.224391	0.179884
61.75	0.176451	0.140465	0.0951347	0.155888	0.337438	0.138323	0.155471	0.206838	0.200821	0.10635	0.0940943	0.10556	0.104063	0.072061	0.0850093	0.0873135	0.0419713	0.109352	0.0935158	0.0554146	0.0990168	0.126693		61.75	0.278262	0.374399	0.186726	0.207893	0.229952	0.175051	0.214643	0.161396	0.0926485	0.0930469	0.0672315	0.0821526	0.228851	0.184019
62	0.174477	0.138682	0.108657	0.162715	0.285059	0.153519	0.161772	0.208047	0.215541	0.111786	0.0989547	0.115552	0.124946	0.0738983	0.0810426	0.0812962	0.0371471	0.0995945	0.132186	0.0704669	0.100916	0.130298		62	0.250794	0.358767	0.189311	0.20845	0.246905	0.184534	0.216238	0.173538	0.0949616	0.102349	0.0804274	0.0935882	0.238064	0.187533
62.25	0.18644	0.140648	0.0940472	0.156983	0.267017	0.141033	0.148637	0.240631	0.215385	0.113272	0.0918362	0.125208	0.182746	0.0599287	0.0959676	0.0809893	0.0431529	0.0803879	0.100708	0.0639559	0.105813	0.130228		62.25	0.271295	0.362309	0.186731	0.179203	0.232688	0.161265	0.231236	0.168693	0.0995697	0.0930814	0.0837537	0.0948572	0.247034	0.185517
62.5	0.187394	0.146454	0.107295	0.160719	0.306846	0.162276	0.170737	0.171065	0.203353	0.114272	0.0902119	0.0919511	0.137084	0.0612044	0.112684	0.0718017	0.0543237	0.0724461	0.105164	0.0700253	0.112111	0.12902		62.5	0.269017	0.357678	0.205971	0.212667	0.233568	0.156559	0.229927	0.17411	0.102	0.101167	0.0795873	0.103243	0.235517	0.189309
62.75	0.183186	0.146474	0.0826018	0.158361	0.305323	0.149244	0.167898	0.218507	0.179295	0.105312	0.0930452	0.0957394	0.124396	0.075752	0.10017	0.0696856	0.0441673	0.0796563	0.0999605	0.0716835	0.0934353	0.1259		62.75	0.247052	0.353192	0.197221	0.217546	0.221761	0.152373	0.246042	0.16357	0.0965556	0.0972479	0.0773687	0.0859475	0.246446	0.184794
63	0.184947	0.136365	0.104402	0.158867	0.291312	0.159944	0.147866	0.204704	0.188007	0.114835	0.0929236	0.108614	0.115473	0.0696229	0.108218	0.0572656	0.0384563	0.0685048	0.137811	0.0671919	0.102867	0.126581		63	0.281885	0.382253	0.200267	0.210836	0.207424	0.15424	0.217267	0.169612	0.101317	0.104628	0.0768945	0.0848937	0.24717	0.187591
63.25	0.19083	0.139933	0.088084	0.163224	0.3201	0.15761	0.162159	0.216303	0.173302	0.113049	0.0991852	0.0964967	0.101209	0.0858584	0.094215	0.0657902	0.0440655	0.0698553	0.104881	0.0688626	0.100891	0.126472		63.25	0.246692	0.366176	0.186903	0.228041	0.210738	0.171455	0.233712	0.192706	0.108459	0.103214	0.0791187	0.0890304	0.246559	0.189446
63.5	0.178491	0.141989	0.088724	0.167134	0.335959	0.156293	0.176828	0.208383	0.165941	0.118828	0.0885408	0.0922966	0.129183	0.0752631	0.0922667	0.0770591	0.0492821	0.120766	0.0844177	0.0682235	0.115161	0.130049		63.5	0.264451	0.331582	0.18126	0.206053	0.220192	0.152441	0.21346	0.188523	0.099311	0.0956833	0.0795215	0.106037	0.247041	0.183504
63.75	0.193899	0.147028	0.0978746	0.16914	0.336083	0.163766	0.161576	0.211424	0.160472	0.11869	0.0992559	0.105383	0.119215	0.0787201	0.0972812	0.0746795	0.0590482	0.086995	0.081862	0.0668016	0.106087	0.130251		63.75	0.260406	0.349493	0.195035	0.223368	0.262081	0.176531	0.210861	0.193528	0.101758	0.105357	0.0940117	0.09999	0.295931	0.197565
64	0.183427	0.151925	0.0896257	0.150844	0.326762	0.148941	0.168323	0.209444	0.174514	0.114792	0.0927107	0.0879135	0.143181	0.0778648	0.104442	0.0917704	0.047522	0.104781	0.132922	0.0687442	0.0899856	0.131449		64	0.274954	0.364398	0.197357	0.197319	0.219473	0.157406	0.181453	0.18524	0.102311	0.100867	0.0789018	0.103554	0.255449	0.186053
64.25	0.169164	0.1408	0.0759947	0.144583	0.300818	0.147239	0.140837	0.179469	0.178721	0.119127	0.0904532	0.101402	0.197236	0.0696548	0.0880857	0.0920702	0.0547055	0.095146	0.142208	0.0699624	0.11047	0.128959		64.25	0.281219	0.360119	0.191188	0.233429	0.224929	0.161957	0.173802	0.202747	0.110232	0.101992	0.0899638	0.109252	0.243418	0.191096
64.5	0.159458	0.146026	0.0875092	0.154302	0.336449	0.147107	0.149416	0.161456	0.16649	0.112493	0.0968761	0.0873764	0.175931	0.073512	0.0924779	0.0763941	0.0389279	0.0741585	0.127548	0.0638704	0.0966782	0.124974		64.5	0.2757	0.387543	0.186223	0.193565	0.254087	0.165951	0.217156	0.19918	0.101101	0.0987603	0.0859935	0.119852	0.230759	0.193529
64.75	0.191132	0.145477	0.0757098	0.158106	0.289438	0.149876	0.149572	0.209466	0.17943	0.127011	0.10123	0.0888772	0.127631	0.0769873	0.0910623	0.0769425	0.0550133	0.0898464	0.160849	0.0655389	0.104676	0.129232		64.75	0.282992	0.396786	0.185082	0.213912	0.264997	0.168191	0.216312	0.198584	0.107658	0.0934341	0.0941112	0.127577	0.243076	0.199439
65	0.167945	0.152797	0.0843004	0.145558	0.285124	0.133214	0.140293	0.185692	0.203402	0.117734	0.1018	0.0983836	0.122697	0.0576588	0.0997037	0.0786144	0.0520489	0.10148	0.0651894	0.0565821	0.086823	0.120811		65	0.298106	0.367002	0.183436	0.228391	0.21323	0.150102	0.225162	0.201058	0.110096	0.0999594	0.0867119	0.108195	0.25132	0.194059
65.25	0.168349	0.129906	0.0800445	0.146435	0.281954	0.159905	0.159954	0.217816	0.184425	0.12335	0.104889	0.110681	0.196206	0.0912634	0.108749	0.0803008	0.056266	0.0727047	0.114079	0.0592047	0.0888643	0.130255		65.25	0.306095	0.399731	0.177862	0.207662	0.209077	0.153835	0.205548	0.19932	0.100745	0.103927	0.089073	0.124248	0.246046	0.19409
65.5	0.178655	0.133922	0.0826343	0.152085	0.325299	0.137727	0.15154	0.223908	0.173402	0.122677	0.101698	0.0966889	0.142021	0.0735952	0.101368	0.0764616	0.0436018	0.0996459	0.171314	0.0605977	0.120541	0.131875		65.5	0.300805	0.392984	0.187645	0.236626	0.178795	0.16215	0.18446	0.203424	0.104172	0.107243	0.0884631	0.11804	0.24582	0.193125
65.75	0.168968	0.119923	0.0704852	0.141427	0.237264	0.13507	0.150846	0.227226	0.17695	0.117062	0.0973218	0.101729	0.135309	0.0881623	0.102099	0.0631645	0.0552204	0.0776399	0.109661	0.0665541	0.100747	0.121087		65.75	0.324831	0.390069	0.182507	0.218502	0.169956	0.159081	0.199893	0.207881	0.104475	0.0943112	0.0948534	0.121179	0.232922	0.192343
66	0.167852	0.114083	0.0767553	0.16628	0.282871	0.133744	0.146932	0.232204	0.176356	0.1337	0.0925417	0.0908462	0.189481	0.0645651	0.089819	0.0666195	0.0568353	0.113089	0.0982534	0.059586	0.0930013	0.125972		66	0.319814	0.391586	0.17561	0.219491	0.183616	0.146062	0.207412	0.217191	0.108445	0.101763	0.0905455	0.107406	0.238753	0.192899
66.25	0.159517	0.118946	0.077735	0.122735	0.312499	0.126959	0.136645	0.231409	0.187078	0.12837	0.10406	0.0883006	0.132714	0.0928314	0.0850082	0.0756561	0.0532551	0.0522208	0.0816572	0.0620533	0.0929649	0.120124		66.25	0.338223	0.36267	0.174743	0.250735	0.240455	0.141909	0.216729	0.2157	0.106557	0.11007	0.0902017	0.135355	0.256816	0.20309
66.5	0.155325	0.108934	0.0603434	0.123549	0.257933	0.131547	0.153739	0.199934	0.16598	0.134357	0.103452	0.10861	0.142442	0.0966068	0.0961204	0.0819605	0.0498697	0.0651091	0.129048	0.0705024	0.103297	0.120889		66.5	0.382555	0.375094	0.182642	0.294136	0.18266	0.149966	0.23858	0.213961	0.108389	0.105638	0.0973049	0.104772	0.232492	0.205245
66.75	0.15745	0.106452	0.0737647	0.140412	0.249421	0.141443	0.150581	0.21873	0.170248	0.119582	0.103367	0.114671	0.140782	0.0880944	0.117453	0.0743337	0.0452772	0.0709187	0.0809164	0.0633543	0.0807344	0.119428		66.75	0.345452	0.400083	0.189529	0.284226	0.189319	0.140674	0.22522	0.218593	0.1086	0.102514	0.0910882	0.102892	0.244326	0.20327
67	0.158187	0.103347	0.0613581	0.13515	0.287349	0.12474	0.145693	0.240144	0.16634	0.130877	0.103928	0.0972695	0.140319	0.0767444	0.0861471	0.0647575	0.0544033	0.102795	0.0614926	0.0861126	0.0937624	0.120044		67	0.295411	0.387688	0.170737	0.256016	0.209828	0.125442	0.218527	0.225781	0.104478	0.103754	0.0954441	0.141011	0.255659	0.199214
67.25	0.177733	0.110051	0.0684951	0.129626	0.27341	0.140055	0.154154	0.244136	0.155572	0.134855	0.0995507	0.123558	0.14842	0.117665	0.085302	0.0682182	0.0614628	0.100602	0.0999833	0.0757746	0.0984614	0.127004		67.25	0.299367	0.37427	0.160598	0.248417	0.238032	0.134652	0.206936	0.221596	0.1043	0.101787	0.0901965	0.111165	0.259601	0.196225
67.5	0.163484	0.108088	0.0654808	0.136473	0.306469	0.142782	0.163857	0.202656	0.168908	0.139011	0.101328	0.114558	0.141025	0.0965935	0.0875508	0.0742337	0.0550821	0.0913952	0.0719484	0.0813372	0.0915978	0.123993		67.5	0.28866	0.390901	0.168273	0.236941	0.252891	0.149707	0.176063	0.220911	0.0996183	0.112532	0.0927414	0.103471	0.252372	0.195776
67.75	0.148387	0.100863	0.0641866	0.115487	0.285656	0.131445	0.147623	0.199127	0.177252	0.135604	0.096727	0.120757	0.173772	0.0818484	0.0906545	0.0745811	0.0383098	0.0612272	0.0689663	0.0730715	0.105041	0.118599		67.75	0.369108	0.403197	0.16256	0.225414	0.206712	0.128764	0.237375	0.219939	0.112237	0.113036	0.0938944	0.112512	0.212376	0.199779
68	0.16611	0.115264	0.0591079	0.138734	0.271466	0.136735	0.146555	0.201193	0.184891	0.131244	0.10822	0.104819	0.144133	0.109257	0.0847393	0.0669854	0.0402117	0.0670049	0.115923	0.078557	0.11065	0.122943		68	0.354772	0.396916	0.178116	0.196138	0.225771	0.141585	0.200624	0.216105	0.103294	0.108759	0.0987691	0.0978535	0.264426	0.198702
68.25	0.165413	0.105057	0.0663535	0.129728	0.252448	0.130097	0.162352	0.214642	0.234626	0.135845	0.0996256	0.104722	0.123468	0.100571	0.0812116	0.0785825	0.0515668	0.0920619	0.0849379	0.0677764	0.110577	0.123413		68.25	0.347095	0.393716	0.189595	0.269566	0.210461	0.138246	0.198434	0.225028	0.114135	0.110547	0.092185	0.110894	0.209833	0.200749
68.5	0.167418	0.10213	0.0844849	0.1439	0.24735	0.132232	0.155683	0.199784	0.206918	0.132314	0.0986734	0.0972256	0.130637	0.0940405	0.0840995	0.0604107	0.0545038	0.0518038	0.12725	0.0561622	0.0923969	0.119972		68.5	0.327892	0.414555	0.1649	0.229387	0.213885	0.144107	0.199637	0.240092	0.113722	0.113094	0.0978915	0.113355	0.240786	0.201023
68.75	0.169574	0.116704	0.0712731	0.142533	0.281776	0.139382	0.170861	0.184958	0.200066	0.144077	0.102085	0.124091	0.130717	0.0849556	0.0818809	0.07827	0.0473599	0.0729632	0.061399	0.0756444	0.0912956	0.12247		68.75	0.315967	0.386408	0.179512	0.279917	0.213989	0.142539	0.230888	0.252174	0.108625	0.109635	0.0998044	0.11604	0.21573	0.203941
69	0.161826	0.116508	0.0688477	0.147683	0.290331	0.150696	0.147549	0.192685	0.228529	0.147808	0.0985013	0.105333	0.131375	0.105821	0.107962	0.0766354	0.0429781	0.0797354	0.0605811	0.0711987	0.125957	0.126597		69	0.324603	0.408232	0.196037	0.26098	0.227885	0.130547	0.262629	0.227091	0.109672	0.109962	0.0920562	0.143996	0.23566	0.20995
69.25	0.152196	0.116436	0.0377444	0.110278	0.301258	0.124736	0.12917	0.194334	0.211125	0.137947	0.109862	0.106289	0.132353	0.113609	0.078051	0.0662271	0.0457688	0.0757097	0.0874864	0.0680086	0.0810094	0.118076		69.25	0.313964	0.409708	0.174955	0.263699	0.224613	0.134671	0.223813	0.22581	0.119344	0.110946	0.116027	0.133628	0.226445	0.205971
69.5	0.18309	0.108133	0.0719865	0.116013	0.233022	0.135919	0.173336	0.215987	0.218269	0.140289	0.0985531	0.132204	0.118158	0.094437	0.101298	0.0946743	0.0556438	0.0770539	0.107156	0.0790568	0.100031	0.126396		69.5	0.340257	0.40172	0.186166	0.25236	0.193268	0.121551	0.226713	0.23566	0.119339	0.108535	0.10742	0.119554	0.231157	0.203361
69.75	0.155309	0.112154	0.0665015	0.124005	0.282027	0.130471	0.143182	0.222897	0.245276	0.13541	0.0891762	0.0802195	0.100104	0.0970478	0.0972353	0.0679281	0.0514737	0.0795042	0.0845504	0.0748943	0.0973519	0.120796		69.75	0.32588	0.379889	0.170225	0.321358	0.212089	0.133954	0.208093	0.214576	0.100637	0.0991081	0.0839651	0.0884141	0.21632	0.196501
70	0.150233	0.105583	0.0565193	0.12194	0.279005	0.127048	0.137356	0.18976	0.241595	0.140717	0.106168	0.107434	0.110932	0.075593	0.0972431	0.0732085	0.0531275	0.0764686	0.0693219	0.0822384	0.0986356	0.119054		70	0.32635	0.402497	0.175699	0.278408	0.191611	0.112229	0.219542	0.213506	0.110958	0.106559	0.095074	0.101618	0.214203	0.196019
70.25	0.155666	0.11425	0.0607083	0.147257	0.298227	0.155867	0.14792	0.186608	0.222818	0.135185	0.0952624	0.113743	0.133223	0.108331	0.0950675	0.0671225	0.045304	0.0727909	0.122562	0.0656342	0.0935245	0.125575		70.25	0.34202	0.396511	0.187951	0.271123	0.202548	0.13891	0.202385	0.213764	0.11196	0.107734	0.0927053	0.108173	0.22285	0.199895
70.5	0.173602	0.117218	0.0800438	0.159953	0.287199	0.134093	0.169914	0.226965	0.18416	0.126615	0.108462	0.106683	0.0821883	0.0901258	0.095674	0.0790525	0.0713511	0.057257	0.11254	0.0673831	0.0710027	0.12388		70.5	0.265761	0.412264	0.203726	0.310749	0.213234	0.142377	0.210673	0.216342	0.108801	0.104221	0.0937631	0.105571	0.221123	0.200662
70.75	0.149187	0.123905	0.0712362	0.129015	0.275617	0.142528	0.159211	0.225798	0.2154	0.130176	0.0973952	0.120475	0.103263	0.104883	0.0899601	0.0746121	0.0646677	0.0958986	0.0948733	0.0672491	0.095334	0.125271		70.75	0.285574	0.439621	0.189172	0.27128	0.218272	0.151007	0.196559	0.228032	0.112828	0.108048	0.0929735	0.106545	0.24509	0.203462
71	0.170149	0.131639	0.0732093	0.139176	0.289573	0.154924	0.186532	0.229795	0.196278	0.137152	0.0956967	0.128039	0.110135	0.0863604	0.0946096	0.0684322	0.0439158	0.0845079	0.117274	0.0743084	0.100831	0.129168		71	0.299582	0.428571	0.172186	0.216948	0.253906	0.161252	0.251514	0.220896	0.0998062	0.107591	0.0983347	0.0868506	0.221215	0.201435
71.25	0.195565	0.133414	0.0688099	0.142482	0.291693	0.159076	0.170609	0.209254	0.186813	0.146405	0.0938265	0.120414	0.103024	0.103486	0.0811123	0.0786653	0.0493525	0.0777226	0.0771701	0.0706347	0.0967564	0.12649		71.25	0.273127	0.453127	0.17502	0.220082	0.247719	0.149113	0.2346	0.23121	0.10547	0.111313	0.0968328	0.110212	0.230153	0.202922
71.5	0.176097	0.130802	0.0796675	0.158056	0.343436	0.140785	0.164515	0.239514	0.186493	0.136078	0.103712	0.116014	0.164111	0.0890026	0.087713	0.0715457	0.0552735	0.0842508	0.127682	0.0625985	0.0987	0.134097		71.5	0.264632	0.471042	0.173152	0.201792	0.236869	0.159465	0.163849	0.236379	0.111767	0.113408	0.100199	0.124606	0.260965	0.201394
71.75	0.175661	0.133156	0.0813671	0.170056	0.273483	0.147112	0.180159	0.308431	0.195625	0.144178	0.105793	0.133829	0.131717	0.0797238	0.091694	0.0774459	0.064575	0.09333	0.0890148	0.0564376	0.102195	0.134999		71.75	0.261097	0.436158	0.180878	0.247467	0.262906	0.150427	0.220399	0.231147	0.11617	0.0931022	0.0910421	0.135799	0.244829	0.205494
72	0.180492	0.129206	0.0842618	0.168849	0.281727	0.160776	0.194886	0.268057	0.209544	0.137442	0.107647	0.108269	0.177842	0.0889612	0.103566	0.0904263	0.0559653	0.101837	0.0850623	0.0720048	0.0867952	0.137791		72	0.250116	0.434534	0.183283	0.240336	0.26201	0.164958	0.149304	0.223119	0.111213	0.114159	0.103607	0.118565	0.251727	0.200533
72.25	0.189136	0.132327	0.0673238	0.15035	0.310759	0.147267	0.171085	0.283748	0.228987	0.146795	0.103268	0.14427	0.195845	0.0990099	0.10765	0.0800112	0.05306	0.09015	0.118567	0.0682829	0.0928609	0.141941		72.25	0.252876	0.42525	0.191591	0.243741	0.229901	0.169488	0.159021	0.2239	0.111034	0.110961	0.0971177	0.118443	0.212972	0.195869
72.5	0.18884	0.136913	0.0685706	0.165856	0.279422	0.154703	0.196542	0.299332	0.22612	0.146446	0.104422	0.135221	0.202258	0.0855827	0.0907578	0.0899363	0.0399025	0.0958076	0.124206	0.0657551	0.0776648	0.141631		72.5	0.236143	0.409782	0.180731	0.254033	0.248805	0.167899	0.238485	0.256924	0.111114	0.114073	0.102082	0.114679	0.200637	0.202722
72.75	0.18567	0.144132	0.0773113	0.152139	0.318375	0.170184	0.208009	0.224211	0.220173	0.151847	0.110636	0.145253	0.142623	0.0983348	0.0964559	0.091111	0.0560234	0.0580268	0.103809	0.0582079	0.0921799	0.13832		72.75	0.244987	0.42233	0.184131	0.206124	0.25768	0.161087	0.211543	0.254248	0.114243	0.111116	0.102709	0.124077	0.275622	0.205377
73	0.178325	0.121499	0.0821492	0.1434	0.362089	0.162878	0.196569	0.279271	0.216066	0.142641	0.0990602	0.114631	0.135179	0.0906747	0.0922178	0.103496	0.068567	0.0997756	0.0434355	0.061671	0.120377	0.138761		73	0.238527	0.47189	0.162373	0.236453	0.258854	0.153746	0.224055	0.247595	0.106631	0.118032	0.10092	0.124908	0.232388	0.205875
73.25	0.170561	0.138752	0.0691398	0.144898	0.257599	0.143869	0.195932	0.359931	0.212723	0.146483	0.102075	0.128827	0.150005	0.100503	0.101948	0.0792014	0.0620104	0.0860507	0.0684479	0.0612721	0.114849	0.137861		73.25	0.242884	0.44313	0.18894	0.251179	0.270836	0.166849	0.188903	0.256876	0.111632	0.117115	0.113896	0.128121	0.242979	0.209488
73.5	0.160133	0.126906	0.0726232	0.160668	0.310424	0.162383	0.191578	0.267363	0.252331	0.153917	0.110096	0.124988	0.102513	0.100557	0.105794	0.108647	0.053354	0.0975772	0.107829	0.0680952	0.1419	0.141889		73.5	0.286399	0.443033	0.188654	0.260544	0.254657	0.156143	0.148408	0.254148	0.111657	0.116416	0.0980091	0.126155	0.287968	0.210169
73.75	0.171408	0.121575	0.0629916	0.143771	0.291201	0.140627	0.191161	0.257222	0.247752	0.161534	0.109427	0.125389	0.0819472	0.114569	0.097942	0.108358	0.070006	0.0976874	0.118175	0.0691709	0.107313	0.137582		73.75	0.275684	0.418951	0.183628	0.273157	0.259392	0.146991	0.220718	0.26837	0.110078	0.108744	0.119243	0.120007	0.212478	0.209034
74	0.180518	0.140244	0.0822655	0.157515	0.303684	0.136733	0.204074	0.270187	0.237154	0.153492	0.115004	0.117111	0.107289	0.0862725	0.111006	0.0936743	0.0640509	0.087745	0.0963905	0.0692548	0.132881	0.140312		74	0.262678	0.431506	0.181831	0.278246	0.25961	0.153173	0.203196	0.266577	0.118262	0.115023	0.123695	0.134201	0.247863	0.213528
74.25	0.168771	0.128187	0.0658319	0.158218	0.31882	0.150725	0.20635	0.286669	0.255724	0.153066	0.109922	0.119873	0.132929	0.100554	0.117625	0.0967242	0.0684875	0.083616	0.152154	0.0830783	0.166227	0.148741		74.25	0.277125	0.452063	0.186107	0.277213	0.244402	0.139176	0.181919	0.272002	0.120823	0.124108	0.10654	0.127045	0.274928	0.214112
74.5	0.182413	0.145301	0.0719419	0.170078	0.2909	0.157761	0.180564	0.304284	0.251608	0.160193	0.116967	0.0960094	0.0928733	0.0994902	0.113393	0.0899336	0.0637785	0.101788	0.117884	0.08353	0.124868	0.143598		74.5	0.24068	0.432888	0.188088	0.298163	0.22299	0.157505	0.202139	0.270986	0.130764	0.122653	0.120038	0.147991	0.271071	0.215843
AVERAGE	0.177578	0.133584	0.0720149	0.154689	0.304327	0.152713	0.194186	0.283222	0.234864	0.151641	0.108088	0.125157	0.134346	0.0975549	0.103479	0.0941093	0.059924	0.0898224	0.10509	0.0688318	0.117112				0.255798	0.435082	0.183608	0.257885	0.250713	0.157206	0.197839	0.257163	0.114624	0.115824	0.108425	0.126563	0.24589
