# Supplementary material for: Interaction between Teneurin-2 and microtubules via EB proteins provides a platform for GABAA receptor exocytosis
Source: eLife journal article supplement (doi:10.7554/elife.83276), 2023-06-05
Supplement: fig4-data1 [file 4J.xlsx]

## Sheet: Figure 4J
Recovery rate at 70 minutes after photobleaching
TEN2	ratio		Welch Two Sample t-test
Negative	0.177578
Negative	0.133584		data: dat$ratio by dat$TEN2
Negative	0.0720149		t = -2.3094, df = 19.947, p-value = 0.03175
Negative	0.154689		alternative hypothesis: true difference in means between group Negative and group Positive is not equal to 0
Negative	0.304327		95 percent confidence interval:
Negative	0.152713		-0.127789929 -0.006486054
Negative	0.194186		sample estimates:
Negative	0.283222		mean in group Negative mean in group Positive
Negative	0.234864		0.1410635 0.2082015
Negative	0.151641
Negative	0.108088
Negative	0.125157
Negative	0.134346
Negative	0.0975549
Negative	0.103479
Negative	0.0941093
Negative	0.059924
Negative	0.0898224
Negative	0.10509
Negative	0.0688318
Negative	0.117112
Positive	0.255798
Positive	0.435082
Positive	0.183608
Positive	0.257885
Positive	0.250713
Positive	0.157206
Positive	0.197839
Positive	0.257163
Positive	0.114624
Positive	0.115824
Positive	0.108425
Positive	0.126563
Positive	0.24589
