# Supplementary material for: Interaction between Teneurin-2 and microtubules via EB proteins provides a platform for GABAA receptor exocytosis
Source: eLife journal article supplement (doi:10.7554/elife.83276), 2023-06-05
Supplement: fig6-data2 [file 6E.xlsx]

## Sheet: 220602-001
Colocalization index between each TEN2 and EB1, based on correlation coefficients.
TEN2	Pearson's R value
N-L	0.42		Kruskal-Wallis chi-squared = 47.44, df = 2, p-value = 4.995e-11
N-L	0.51
N-L	0.26		Wilcoxon rank sum test with continuity correction
N-L	-0.11		N-L - TM
N-L	0.67		W = 1710.5, p-value = 8.347e-08
N-L	0.18		alternative hypothesis: true location shift is not equal to 0
N-L	0.72		N-L - N-L2mut
N-L	0.41		W = 1910.5, p-value = 9.743e-10
N-L	0.52		alternative hypothesis: true location shift is not equal to 0
N-L	0.73		TM - N-L2mut
N-L	0.64		W = 1459, p-value = 0.01349
N-L	0.04		alternative hypothesis: true location shift is not equal to 0
N-L	0.75
N-L	0.26
N-L	0.67
N-L	0.14
N-L	0.03
N-L	0.52
N-L	0.76
N-L	0.44
N-L	0.46
N-L	0.8
N-L	0.62
N-L	0.08
N-L	0.68
N-L	0.7
N-L	0.29
N-L	0.75
N-L	0.73
N-L	0.48
N-L	0.6
N-L	0.68
N-L	0.75
N-L	0.47
N-L	0.58
N-L	0.64
N-L	0.71
N-L	0.47
N-L	0.61
N-L	0.31
N-L	0.83
N-L	-0.08
N-L	0.43
N-L	0.77
N-L	0.73
TM	0.11
TM	0.12
TM	0.45
TM	0.19
TM	0.17
TM	0.48
TM	0.12
TM	0.16
TM	0.16
TM	0.01
TM	0.2
TM	0.19
TM	0.05
TM	0.12
TM	0.04
TM	0.27
TM	0.21
TM	0.33
TM	0.19
TM	0.28
TM	0.11
TM	0.33
TM	0.24
TM	0.4
TM	0.38
TM	0.05
TM	0.35
TM	0.17
TM	0.32
TM	0.17
TM	0.29
TM	0.15
TM	0.26
TM	0.35
TM	0.34
TM	0.17
TM	-0.04
TM	0.11
TM	0.39
TM	0.31
TM	0.32
TM	0.19
TM	0.31
TM	0.09
TM	0.2
TM	0.33
N-L2mut	0.02
N-L2mut	0.03
N-L2mut	0.05
N-L2mut	-0.01
N-L2mut	-0.02
N-L2mut	0.22
N-L2mut	0.14
N-L2mut	0.31
N-L2mut	0.24
N-L2mut	0.04
N-L2mut	0.33
N-L2mut	0.41
N-L2mut	0.08
N-L2mut	0.31
N-L2mut	0.25
N-L2mut	0.13
N-L2mut	0.03
N-L2mut	0.27
N-L2mut	0.33
N-L2mut	0.19
N-L2mut	0.4
N-L2mut	0.12
N-L2mut	0.18
N-L2mut	0.04
N-L2mut	0.19
N-L2mut	0.1
N-L2mut	0.16
N-L2mut	-0.04
N-L2mut	0.02
N-L2mut	-0.01
N-L2mut	0.31
N-L2mut	0.3
N-L2mut	0.3
N-L2mut	0.26
N-L2mut	0.02
N-L2mut	0.21
N-L2mut	-0.05
N-L2mut	0.08
N-L2mut	0.32
N-L2mut	0.2
N-L2mut	0.34
N-L2mut	0.12
N-L2mut	0.02
N-L2mut	0.16
N-L2mut	0.08
N-L2mut	0.1
N-L2mut	0.12
N-L2mut	0.02
N-L2mut	0.19
