# Supplementary material for: Interaction between Teneurin-2 and microtubules via EB proteins provides a platform for GABAA receptor exocytosis
Source: eLife journal article supplement (doi:10.7554/elife.83276), 2023-06-05
Supplement: fig6-figsupp1-data2 [file S6C.xlsx]

## Sheet: Figure 6 supplemental figure 1C
Statistical analysis of the GST-pulldown results
Bait	Signal Intensity										Bait	Signal Intensity
GST	76.8799										GST	230.794
GST	124.825										GST	156.797
GST	59.9455										GST	88.5001
GST-EB1	565.329										GST-EB3	783.288
GST-EB1	309.49										GST-EB3	1015.83
GST-EB1	466.622										GST-EB3	843.423
Welch Two Sample t-test											Welch Two Sample t-test
data: dat$signal by dat$bait											data: dat$signal by dat$bait
t = 4.6753, df = 2.2708, p-value = 0.03336											t = 8.9266, df = 3.2406, p-value = 0.002175
alternative hypothesis: true difference in means between group EB1 and group GST is not equal to 0											alternative hypothesis: true difference in means between group EB3 and group GST is not equal to 0
95 percent confidence interval:											95 percent confidence interval:
63.8106 656.0500											475.1768 969.1227
sample estimates:											sample estimates:
mean in group EB1 mean in group GST											mean in group EB3 mean in group GST
447.1470 87.2167											880.8465 158.6968
