# Supplementary material for: Interaction between Teneurin-2 and microtubules via EB proteins provides a platform for GABAA receptor exocytosis
Source: eLife journal article supplement (doi:10.7554/elife.83276), 2023-06-05
Supplement: fig7-data1 [file 7C.xlsx]

## Sheet: Figure 7C
Comet Duration
Anterograde										Retrograde
transfection	speed									transfection	speed
N-L	0.100588		Df Sum Sq Mean Sq F value Pr(>F)							N-L	0.0467759		Df Sum Sq Mean Sq F value Pr(>F)
N-L	0.0645485		transfection 2 0.1659 0.08294 87.05 <2e-16 ***							N-L	0.0986158		transfection 2 0.08231 0.04115 36.21 1.03e-13 ***
N-L	0.0798788		Residuals 569 0.5422 0.00095							N-L	0.139128		Residuals 161 0.18299 0.00114
N-L	0.0982636		---							N-L	0.148794		---
N-L	0.12289		Signif. codes: 0 ‘***’ 0.001 ‘**’ 0.01 ‘*’ 0.05 ‘.’ 0.1 ‘ ’ 1							N-L	0.177508		Signif. codes: 0 ‘***’ 0.001 ‘**’ 0.01 ‘*’ 0.05 ‘.’ 0.1 ‘ ’ 1
N-L	0.136301									N-L	0.0961504
N-L	0.0946712		Tukey multiple comparisons of means							N-L	0.147251		Tukey multiple comparisons of means
N-L	0.0792448		95% family-wise confidence level							N-L	0.23298		95% family-wise confidence level
N-L	0.0295847									N-L	0.0832071
N-L	0.056211									N-L	0.23298
N-L	0.0869791									N-L	0.0832071
N-L	0.0739618		$transfection							N-L	0.135148		$transfection
N-L	0.133131		diff lwr upr p adj							N-L	0.118867		diff lwr upr p adj
N-L	0.0685828		N-L2mut-N-L -0.031157111 -0.03928613 -0.023028091 0.0000000							N-L	0.130521		N-L2mut-N-L -0.041871429 -0.05797888 -0.02576398 0.000000
N-L	0.0970749		TM-N-L -0.037222239 -0.04412759 -0.030316884 0.0000000							N-L	0.125735		TM-N-L -0.047818377 -0.06210710 -0.03352965 0.000000
N-L	0.0764272		TM-N-L2mut -0.006065128 -0.01401338 0.001883125 0.1727808							N-L	0.0645485		TM-N-L2mut -0.005946948 -0.02240548 0.01051159 0.669527
N-L	0.126792									N-L	0.117156
N-L	0.133131									N-L	0.109978
N-L	0.131601									N-L	0.140527
N-L	0.0927885									N-L	0.145458
N-L	0.140963									N-L	0.138062
N-L	0.0570563									N-L	0.131546
N-L	0.125735									N-L	0.128201
N-L	0.0917127									N-L	0.128011
N-L	0.0678709									N-L	0.118339
N-L	0.113408									N-L	0.100857
N-L	0.0804335									N-L	0.093975
N-L	0.0554714									N-L	0.168633
N-L	0.0811776									N-L	0.110427
N-L	0.0739618									N-L	0.108169
N-L	0.103547									N-L	0.135006
N-L	0.107245									N-L	0.124256
N-L	0.110943									N-L	0.169791
N-L	0.0576902									N-L	0.205244
N-L	0.106834									N-L	0.164829
N-L	0.110943									N-L	0.11683
N-L	0.0887542									N-L	0.147924
N-L	0.130173									N-L	0.0976296
N-L	0.118339									N-L	0.135245
N-L	0.139471									N-L	0.0765505
N-L	0.139471									N-L	0.127214
N-L	0.0739618									N-L	0.160027
N-L	0.0887542									N-L	0.190188
N-L	0.139471									N-L	0.147924
N-L	0.118339									N-L	0.126304
N-L	0.0920414									N-L	0.147924
N-L	0.106908									N-L	0.0887542
N-L	0.122037									N-L	0.137569
N-L	0.11045									N-L	0.09103
N-L	0.118339									N-L	0.107027
N-L	0.11027									N-L	0.199697
N-L	0.103547									N-L	0.21301
N-L	0.0946712									N-L	0.0998485
N-L	0.127584									N-L	0.117282
N-L	0.157785									N-L	0.0829659
N-L	0.0887542									N-L	0.095478
N-L	0.127584									N-L	0.0943013
N-L	0.157785									N-L	0.0550276
N-L	0.0887542									N-L	0.105822
N-L	0.102067									N-L	0.110943
N-L	0.114641									N-L	0.0631141
N-L	0.0948056									N-L	0.0806856
N-L	0.11649									N-L	0.114522
N-L	0.130912									N-L	0.159758
N-L	0.150037									N-L	0.0887542
N-L	0.103547									N-L	0.0615228
N-L	0.101433									TM	0.0652604
N-L	0.12327									TM	0.0540846
N-L	0.128201									TM	0.081927
N-L	0.177508									TM	0.0493079
N-L	0.149773									TM	0.0504285
N-L	0.144226									TM	0.0832071
N-L	0.145234									TM	0.0488148
N-L	0.177508									TM	0.0591695
N-L	0.15532									TM	0.0355017
N-L	0.110943									TM	0.0461522
N-L	0.135245									TM	0.0633959
N-L	0.128201									TM	0.0347299
N-L	0.133131									TM	0.0480752
N-L	0.144484									TM	0.0657123
N-L	0.117156									TM	0.0665657
N-L	0.0847199									TM	0.0621279
N-L	0.143573									TM	0.0536223
N-L	0.142993									TM	0.0373025
N-L	0.142007									TM	0.0785133
N-L	0.164829									TM	0.0637921
N-L	0.133131									TM	0.0582449
N-L	0.0887542									TM	0.0776599
N-L	0.124256									TM	0.0887542
N-L	0.0976296									TM	0.076075
N-L	0.0898636									TM	0.0605142
N-L	0.138062									TM	0.0828373
N-L	0.109236									TM	0.0517733
N-L	0.116063									TM	0.0721128
N-L	0.0989951									TM	0.0656781
N-L	0.104417									TM	0.0766514
N-L	0.0559537									TM	0.0953636
N-L	0.107245									TM	0.0887542
N-L	0.126124									TM	0.0678709
N-L	0.0665657									TM	0.0791592
N-L	0.0887542									TM	0.0697355
N-L	0.154015									TM	0.102067
N-L	0.100702									TM	0.087224
N-L	0.123789									TM	0.0838234
N-L	0.188603									TM	0.0921678
N-L	0.121028									TM	0.100857
N-L	0.159235									TM	0.0857957
N-L	0.0909731									TM	0.0924523
N-L	0.146444									TM	0.12327
N-L	0.15532									TM	0.0981675
N-L	0.157027									TM	0.13609
N-L	0.121753									TM	0.142007
N-L	0.196527									TM	0.0878486
N-L	0.141056									TM	0.0665657
N-L	0.117599									TM	0.0776599
N-L	0.142993									TM	0.105396
N-L	0.108477									TM	0.125735
N-L	0.126362									TM	0.0648588
N-L	0.140527									TM	0.0803014
N-L	0.114858									TM	0.0907714
N-L	0.129097									TM	0.0931919
N-L	0.09129									TM	0.0805362
N-L	0.141452									TM	0.110943
N-L	0.106505									TM	0.077249
N-L	0.0544628									TM	0.0815966
N-L	0.0739618									N-L2mut	0.117916
N-L	0.141452									N-L2mut	0.189342
N-L	0.106505									N-L2mut	0.0621279
N-L	0.0544628									N-L2mut	0.105822
N-L	0.0739618									N-L2mut	0.11649
N-L	0.0843165									N-L2mut	0.0798788
N-L	0.11296									N-L2mut	0.0798788
N-L	0.15532									N-L2mut	0.0887542
N-L	0.0665657									N-L2mut	0.0861438
N-L	0.133131									N-L2mut	0.0724047
N-L	0.0824146									N-L2mut	0.0502941
N-L	0.110943									N-L2mut	0.0377205
N-L	0.238527									N-L2mut	0.0458086
N-L	0.15532									N-L2mut	0.0408736
N-L	0.138062									N-L2mut	0.0394463
N-L	0.12289									N-L2mut	0.0230103
N-L	0.0950938									N-L2mut	0.0591695
N-L	0.118339									N-L2mut	0.0499242
N-L	0.119818									N-L2mut	0.090461
N-L	0.133131									N-L2mut	0.087275
N-L	0.140527									N-L2mut	0.0573204
N-L	0.0726171									N-L2mut	0.119117
N-L	0.0658933									N-L2mut	0.0682725
N-L	0.0816539									N-L2mut	0.0986158
N-L	0.0798788									N-L2mut	0.0810365
N-L	0.133131									N-L2mut	0.127584
N-L	0.119818									N-L2mut	0.0726171
N-L	0.103018									N-L2mut	0.081927
N-L	0.0769203									N-L2mut	0.0443771
N-L	0.0931919									N-L2mut	0.0633959
N-L	0.221886									N-L2mut	0.11296
N-L	0.116063									N-L2mut	0.123886
N-L	0.127584									N-L2mut	0.128694
N-L	0.135742									N-L2mut	0.103547
N-L	0.102067									N-L2mut	0.0843165
N-L	0.125735									N-L2mut	0.102067
N-L	0.121028									N-L2mut	0.056211
N-L	0.0958545									N-L2mut	0.0473356
N-L	0.156905									N-L2mut	0.140527
N-L	0.160867
N-L	0.122037
N-L	0.0693392
N-L	0.116994
N-L	0.0824146
N-L	0.0739618
N-L	0.129433
N-L	0.0959118
N-L	0.100857
N-L	0.0652604
N-L	0.0378027
N-L	0.168633
N-L	0.0714964
N-L	0.111765
N-L	0.0887542
N-L	0.126792
N-L	0.199697
N-L	0.147924
N-L	0.0776599
N-L	0.12327
N-L	0.138678
N-L	0.15532
N-L	0.124256
N-L	0.107773
N-L	0.0965855
N-L	0.195259
N-L	0.0526978
N-L	0.0781882
N-L	0.0549431
N-L	0.114113
N-L	0.184905
N-L	0.0537904
N-L	0.128694
N-L	0.0953286
N-L	0.0343565
N-L	0.105104
N-L	0.147924
N-L	0.0493079
N-L	0.0676223
N-L	0.103112
N-L	0.133131
N-L	0.0721128
N-L	0.0614452
N-L	0.0832071
TM	0.0677984
TM	0.0754411
TM	0.0887542
TM	0.0665657
TM	0.0672814
TM	0.0502941
TM	0.0422639
TM	0.0724047
TM	0.0781882
TM	0.0392567
TM	0.0616349
TM	0.0730917
TM	0.10226
TM	0.103547
TM	0.0633959
TM	0.108926
TM	0.0739618
TM	0.0680449
TM	0.0522084
TM	0.0443771
TM	0.0363085
TM	0.0443771
TM	0.0591695
TM	0.0633959
TM	0.0415141
TM	0.0730917
TM	0.0677984
TM	0.0754411
TM	0.0887542
TM	0.0665657
TM	0.0672814
TM	0.0502941
TM	0.0422639
TM	0.0724047
TM	0.0781882
TM	0.0392567
TM	0.0616349
TM	0.0730917
TM	0.10226
TM	0.103547
TM	0.0633959
TM	0.108926
TM	0.0739618
TM	0.0680449
TM	0.0522084
TM	0.0443771
TM	0.0363085
TM	0.0443771
TM	0.0591695
TM	0.0633959
TM	0.0415141
TM	0.0730917
TM	0.0375499
TM	0.0542387
TM	0.0798788
TM	0.0637921
TM	0.0295847
TM	0.0471507
TM	0.0469875
TM	0.0716861
TM	0.0413514
TM	0.0710034
TM	0.0838234
TM	0.0277357
TM	0.0665657
TM	0.0713893
TM	0.04236
TM	0.0380375
TM	0.02824
TM	0.0443771
TM	0.0443771
TM	0.0542387
TM	0.0621279
TM	0.081927
TM	0.0234938
TM	0.0804335
TM	0.0704813
TM	0.0716861
TM	0.076075
TM	0.0855844
TM	0.147924
TM	0.0471507
TM	0.0463942
TM	0.0685828
TM	0.0976296
TM	0.0832071
TM	0.0421014
TM	0.0665657
TM	0.0443771
TM	0.0582449
TM	0.0424477
TM	0.0678709
TM	0.0637921
TM	0.0887542
TM	0.0887542
TM	0.0678709
TM	0.0776599
TM	0.063152
TM	0.0612827
TM	0.0603529
TM	0.0710034
TM	0.118339
TM	0.0955815
TM	0.113408
TM	0.108477
TM	0.0776599
TM	0.06265
TM	0.0682725
TM	0.0998485
TM	0.0887542
TM	0.0887542
TM	0.0887542
TM	0.0887542
TM	0.0499242
TM	0.0645485
TM	0.0355017
TM	0.0946712
TM	0.0906836
TM	0.100588
TM	0.0726171
TM	0.05648
TM	0.0443771
TM	0.0921678
TM	0.0976296
TM	0.0752481
TM	0.101433
TM	0.0680449
TM	0.0732222
TM	0.0548188
TM	0.0976296
TM	0.0554714
TM	0.0673875
TM	0.11265
TM	0.103547
TM	0.0697355
TM	0.0583909
TM	0.0580316
TM	0.117469
TM	0.101433
TM	0.0730917
TM	0.114113
TM	0.0943013
TM	0.0739618
TM	0.0785133
TM	0.0901857
TM	0.0583909
TM	0.0739618
TM	0.0591695
TM	0.054618
TM	0.0887542
TM	0.0591695
TM	0.0656781
TM	0.0754411
TM	0.0558293
TM	0.114113
TM	0.0774424
TM	0.0680449
TM	0.0776599
TM	0.0443771
TM	0.136545
TM	0.0628676
TM	0.0607266
TM	0.0824146
TM	0.0549431
TM	0.124256
TM	0.0685828
TM	0.0917127
TM	0.0836338
TM	0.0625314
TM	0.081358
TM	0.101433
TM	0.106012
TM	0.0426703
TM	0.093685
TM	0.0973433
TM	0.0591695
TM	0.0633959
TM	0.0499242
TM	0.0554714
TM	0.0739618
TM	0.081358
TM	0.0460839
TM	0.0504285
TM	0.0887542
TM	0.0929146
TM	0.0950938
TM	0.09129
TM	0.0887542
TM	0.147924
TM	0.108926
TM	0.090461
TM	0.104286
TM	0.120452
TM	0.0820976
TM	0.0943013
TM	0.100857
TM	0.104603
TM	0.0542387
TM	0.0976296
TM	0.107773
TM	0.106505
TM	0.0838234
TM	0.0887542
TM	0.119184
TM	0.117469
TM	0.0832071
TM	0.0865354
TM	0.127584
TM	0.0739618
TM	0.109236
TM	0.113162
TM	0.102768
TM	0.105396
TM	0.0887542
TM	0.107139
TM	0.125451
TM	0.0994659
TM	0.0887542
TM	0.05648
TM	0.0766514
TM	0.0554714
TM	0.0645485
TM	0.079107
TM	0.112422
TM	0.0700691
TM	0.0739618
TM	0.0887542
TM	0.0443771
TM	0.0968228
TM	0.0710034
TM	0.0721128
TM	0.0591695
TM	0.0607266
TM	0.0665657
TM	0.0542387
N-L2mut	0.0839131
N-L2mut	0.0870474
N-L2mut	0.107773
N-L2mut	0.126792
N-L2mut	0.0943013
N-L2mut	0.0887542
N-L2mut	0.080498
N-L2mut	0.0702637
N-L2mut	0.0769203
N-L2mut	0.113408
N-L2mut	0.0493079
N-L2mut	0.05648
N-L2mut	0.117282
N-L2mut	0.0580316
N-L2mut	0.0969722
N-L2mut	0.11649
N-L2mut	0.0982636
N-L2mut	0.0954108
N-L2mut	0.076075
N-L2mut	0.160867
N-L2mut	0.0766514
N-L2mut	0.0719215
N-L2mut	0.0859806
N-L2mut	0.0690311
N-L2mut	0.0750997
N-L2mut	0.0739618
N-L2mut	0.0295847
N-L2mut	0.045962
N-L2mut	0.0644525
N-L2mut	0.0832071
N-L2mut	0.103547
N-L2mut	0.0853406
N-L2mut	0.0955815
N-L2mut	0.106505
N-L2mut	0.0674532
N-L2mut	0.070726
N-L2mut	0.0906033
N-L2mut	0.0591695
N-L2mut	0.090461
N-L2mut	0.0739618
N-L2mut	0.119818
N-L2mut	0.0798788
N-L2mut	0.0950938
N-L2mut	0.0690311
N-L2mut	0.0887542
N-L2mut	0.0785133
N-L2mut	0.0792448
N-L2mut	0.0682725
N-L2mut	0.0665657
N-L2mut	0.0507167
N-L2mut	0.0641003
N-L2mut	0.0340224
N-L2mut	0.0665657
N-L2mut	0.030871
N-L2mut	0.0998485
N-L2mut	0.0270121
N-L2mut	0.0238954
N-L2mut	0.0231533
N-L2mut	0.0838234
N-L2mut	0.122037
N-L2mut	0.0637921
N-L2mut	0.0665657
N-L2mut	0.133131
N-L2mut	0.0739618
N-L2mut	0.139471
N-L2mut	0.106505
N-L2mut	0.0630622
N-L2mut	0.140527
N-L2mut	0.0867371
N-L2mut	0.0955815
N-L2mut	0.093685
N-L2mut	0.266263
N-L2mut	0.0943013
N-L2mut	0.118339
N-L2mut	0.0532525
N-L2mut	0.0633959
N-L2mut	0.0776599
N-L2mut	0.236678
N-L2mut	0.133131
N-L2mut	0.0754411
N-L2mut	0.0838234
N-L2mut	0.0633959
N-L2mut	0.0838234
N-L2mut	0.0747404
N-L2mut	0.040679
N-L2mut	0.0697355
N-L2mut	0.0633959
N-L2mut	0.076075
N-L2mut	0.076075
N-L2mut	0.0716861
N-L2mut	0.0605142
N-L2mut	0.11649
N-L2mut	0.110943
N-L2mut	0.0394463
N-L2mut	0.0621279
N-L2mut	0.0554714
N-L2mut	0.0499242
N-L2mut	0.0341362
N-L2mut	0.0633959
N-L2mut	0.0652604
N-L2mut	0.0480752
N-L2mut	0.0687845
N-L2mut	0.0621279
N-L2mut	0.0542387
N-L2mut	0.0190188
N-L2mut	0.133131
N-L2mut	0.0532525
N-L2mut	0.0656009
N-L2mut	0.0855844
N-L2mut	0.107245
N-L2mut	0.0783996
N-L2mut	0.124256
N-L2mut	0.105396
N-L2mut	0.0665657
N-L2mut	0.046596
N-L2mut	0.0443771
N-L2mut	0.0208833
N-L2mut	0.0887542
N-L2mut	0.126304
N-L2mut	0.133131
N-L2mut	0.0850561
N-L2mut	0.0591695
N-L2mut	0.0665657
N-L2mut	0.0950938
N-L2mut	0.118339
N-L2mut	0.0721128
N-L2mut	0.0360564
N-L2mut	0.0380375
N-L2mut	0.0682725
N-L2mut	62.37
N-L2mut	38.61
