# Supplementary material for: Interaction between Teneurin-2 and microtubules via EB proteins provides a platform for GABAA receptor exocytosis
Source: eLife journal article supplement (doi:10.7554/elife.83276), 2023-06-05
Supplement: fig7-data1 [file 7D.xlsx]

## Sheet: Figure 7D
Comet Run Length
Anterograde										Retrograde
transfection	length									transfection	length
N-L	4.4812		Df Sum Sq Mean Sq F value Pr(>F)							N-L	5.1402		Df Sum Sq Mean Sq F value Pr(>F)
N-L	4.2176		transfection 2 296 147.81 16.27 1.35e-07 ***							N-L	2.636		transfection 2 419 209.7 10.08 7.49e-05 ***
N-L	4.7448		Residuals 569 5170 9.09							N-L	30.5776		Residuals 161 3348 20.8
N-L	4.0858		---							N-L	7.5126		---
N-L	4.7448		Signif. codes: 0 ‘***’ 0.001 ‘**’ 0.01 ‘*’ 0.05 ‘.’ 0.1 ‘ ’ 1							N-L	3.6904		Signif. codes: 0 ‘***’ 0.001 ‘**’ 0.01 ‘*’ 0.05 ‘.’ 0.1 ‘ ’ 1
N-L	5.6674									N-L	6.8536
N-L	8.4352		Tukey multiple comparisons of means							N-L	9.6214		Tukey multiple comparisons of means
N-L	3.295		95% family-wise confidence level							N-L	2.7678		95% family-wise confidence level
N-L	0.2636									N-L	1.977
N-L	5.0084									N-L	2.7678
N-L	6.4582									N-L	1.977
N-L	2.636		$transfection							N-L	8.8306		$transfection
N-L	5.1402		diff lwr upr p adj							N-L	9.885		diff lwr upr p adj
N-L	4.4812		N-L2mut-N-L -1.8223737 -2.6161621 -1.0285854 0.0000003							N-L	6.59		N-L2mut-N-L -3.781723 -5.960616 -1.602830 0.0001881
N-L	4.613		TM-N-L -1.1722300 -1.8465290 -0.4979309 0.0001489							N-L	6.7218		TM-N-L -2.754244 -4.687114 -0.821375 0.0026861
N-L	4.0858		TM-N-L2mut 0.6501438 -0.1259929 1.4262804 0.1210254							N-L	2.1088		TM-N-L2mut 1.027479 -1.198906 3.253863 0.5205785
N-L	10.544									N-L	17.3976
N-L	4.7448									N-L	7.5126
N-L	11.3348									N-L	7.5126
N-L	3.0314									N-L	7.7762
N-L	7.1172									N-L	22.1424
N-L	7.1172									N-L	10.9394
N-L	4.4812									N-L	10.2804
N-L	4.0858									N-L	9.885
N-L	3.4268									N-L	3.1632
N-L	6.0628									N-L	3.295
N-L	3.8222									N-L	4.7448
N-L	1.977									N-L	2.5042
N-L	9.885									N-L	7.0513
N-L	1.977									N-L	5.1402
N-L	4.613									N-L	28.4688
N-L	3.8222									N-L	9.226
N-L	3.954									N-L	11.5984
N-L	1.7134									N-L	4.8766
N-L	8.567									N-L	10.2804
N-L	2.636									N-L	17.0022
N-L	1.8452									N-L	3.954
N-L	5.7992									N-L	2.8996
N-L	9.4896									N-L	8.4352
N-L	2.8996									N-L	9.0942
N-L	2.8996									N-L	11.3348
N-L	3.954									N-L	15.6842
N-L	3.954									N-L	3.954
N-L	2.8996									N-L	2.636
N-L	2.1088									N-L	4.8766
N-L	7.3808									N-L	1.318
N-L	6.9854									N-L	9.7532
N-L	2.8996									N-L	4.0858
N-L	14.7616									N-L	10.544
N-L	8.4352									N-L	5.4038
N-L	10.8076									N-L	2.3724
N-L	1.8452									N-L	3.1632
N-L	4.2176									N-L	8.3034
N-L	3.0314									N-L	4.8766
N-L	8.4352									N-L	5.6674
N-L	2.636									N-L	9.3578
N-L	3.0314									N-L	2.2406
N-L	8.4352									N-L	4.0858
N-L	2.636									N-L	24.5148
N-L	3.0314									N-L	9.885
N-L	4.0858									N-L	8.4352
N-L	6.1946									N-L	7.908
N-L	5.5356									N-L	10.544
N-L	7.7762									N-L	2.3724
N-L	9.3578									N-L	3.954
N-L	3.6904									N-L	8.0398
N-L	4.2176									TM	3.295
N-L	3.295									TM	5.1402
N-L	3.4268									TM	6.3264
N-L	3.6904									TM	5.272
N-L	3.5586									TM	3.295
N-L	3.4268									TM	3.954
N-L	4.7448									TM	8.6988
N-L	2.1088									TM	3.6904
N-L	1.8452									TM	2.1088
N-L	1.977									TM	3.4268
N-L	16.8704									TM	3.954
N-L	3.4268									TM	2.3724
N-L	3.954									TM	5.1402
N-L	18.452									TM	10.1486
N-L	8.6988									TM	2.3724
N-L	2.7678									TM	0.9226
N-L	7.249									TM	3.8222
N-L	3.8222									TM	7.6444
N-L	4.2176									TM	3.0314
N-L	6.8536									TM	3.0314
N-L	4.3494									TM	2.7678
N-L	1.318									TM	6.4582
N-L	1.8452									TM	3.6904
N-L	1.4498									TM	3.1632
N-L	10.6758									TM	1.977
N-L	3.6904									TM	3.6904
N-L	4.2176									TM	0.9226
N-L	8.9624									TM	1.7134
N-L	3.8222									TM	4.8766
N-L	5.272									TM	2.5042
N-L	3.8222									TM	13.3118
N-L	3.8222									TM	3.6904
N-L	7.1172									TM	3.4268
N-L	4.7448									TM	17.3976
N-L	3.4268									TM	5.7992
N-L	15.5524									TM	6.0628
N-L	7.7762									TM	7.5126
N-L	6.9854									TM	2.2406
N-L	4.4812									TM	3.5586
N-L	3.954									TM	3.295
N-L	8.0398									TM	19.111
N-L	5.4038									TM	3.295
N-L	4.3494									TM	6.59
N-L	2.7678									TM	9.6214
N-L	6.0628									TM	6.0628
N-L	14.1026									TM	4.2176
N-L	4.0858									TM	12.7846
N-L	23.4604									TM	3.1632
N-L	6.9854									TM	1.8452
N-L	3.8222									TM	2.5042
N-L	2.8996									TM	2.2406
N-L	22.1424									TM	7.5126
N-L	2.5042									TM	5.0084
N-L	11.5984									TM	5.931
N-L	4.2176									TM	2.7678
N-L	9.4896									TM	6.4582
N-L	6.7218									TM	3.954
N-L	4.7448									TM	6.1946
N-L	3.5586									TM	7.5126
N-L	1.318									N-L2mut	12.2574
N-L	6.7218									N-L2mut	8.4352
N-L	4.7448									N-L2mut	4.613
N-L	3.5586									N-L2mut	4.0858
N-L	1.318									N-L2mut	2.7678
N-L	2.5042									N-L2mut	8.3034
N-L	3.6904									N-L2mut	2.3724
N-L	1.8452									N-L2mut	3.954
N-L	2.7678									N-L2mut	4.3494
N-L	4.3494									N-L2mut	4.0858
N-L	3.4268									N-L2mut	2.2406
N-L	1.977									N-L2mut	4.4812
N-L	5.6674									N-L2mut	4.2176
N-L	2.7678									N-L2mut	4.613
N-L	7.3808									N-L2mut	2.1088
N-L	4.7448									N-L2mut	1.8452
N-L	1.977									N-L2mut	2.1088
N-L	5.272									N-L2mut	2.3724
N-L	3.5586									N-L2mut	6.9854
N-L	1.5816									N-L2mut	7.7762
N-L	2.5042									N-L2mut	4.0858
N-L	2.3724									N-L2mut	6.7218
N-L	6.4582									N-L2mut	2.636
N-L	6.0628									N-L2mut	2.636
N-L	4.7448									N-L2mut	5.5356
N-L	3.5586									N-L2mut	3.0314
N-L	7.1172									N-L2mut	2.3724
N-L	8.567									N-L2mut	3.1632
N-L	3.4268									N-L2mut	1.4498
N-L	2.7678									N-L2mut	1.318
N-L	2.636									N-L2mut	3.6904
N-L	4.4812									N-L2mut	8.8306
N-L	3.0314									N-L2mut	3.8222
N-L	6.8536									N-L2mut	0.9226
N-L	3.0314									N-L2mut	2.5042
N-L	13.4436									N-L2mut	6.0628
N-L	3.954									N-L2mut	2.5042
N-L	7.1172									N-L2mut	2.1088
N-L	13.0482									N-L2mut	2.5042
N-L	3.8222
N-L	1.4498
N-L	3.295
N-L	3.8222
N-L	3.4268
N-L	1.977
N-L	9.226
N-L	8.8306
N-L	3.295
N-L	3.295
N-L	6.0628
N-L	5.0084
N-L	3.8222
N-L	8.9624
N-L	5.0084
N-L	7.908
N-L	3.5586
N-L	2.636
N-L	4.613
N-L	3.295
N-L	3.295
N-L	4.613
N-L	3.6904
N-L	2.2406
N-L	4.8766
N-L	2.8996
N-L	2.5042
N-L	4.8766
N-L	3.4268
N-L	2.3724
N-L	3.295
N-L	5.272
N-L	3.8222
N-L	7.6444
N-L	3.1632
N-L	5.931
N-L	5.272
N-L	2.636
N-L	4.2176
N-L	10.4122
N-L	3.1632
N-L	3.4268
N-L	2.3724
N-L	1.977
TM	7.249
TM	11.203
TM	1.8452
TM	7.5126
TM	6.1946
TM	6.7218
TM	2.636
TM	4.0858
TM	4.8766
TM	3.0314
TM	3.295
TM	3.6904
TM	6.9854
TM	1.8452
TM	2.636
TM	3.5586
TM	1.977
TM	3.0314
TM	2.636
TM	2.5042
TM	1.1862
TM	1.318
TM	2.1088
TM	1.318
TM	3.8222
TM	3.6904
TM	7.249
TM	11.203
TM	1.8452
TM	7.5126
TM	6.1946
TM	6.7218
TM	2.636
TM	4.0858
TM	4.8766
TM	3.0314
TM	3.295
TM	3.6904
TM	6.9854
TM	1.8452
TM	2.636
TM	3.5586
TM	1.977
TM	3.0314
TM	2.636
TM	2.5042
TM	1.1862
TM	1.318
TM	2.1088
TM	1.318
TM	3.8222
TM	3.6904
TM	1.4498
TM	1.4498
TM	1.1862
TM	3.0314
TM	2.3724
TM	2.2406
TM	4.7448
TM	2.7678
TM	5.4038
TM	3.1632
TM	2.2406
TM	1.318
TM	1.5816
TM	4.8766
TM	2.7678
TM	1.5816
TM	1.8452
TM	3.0314
TM	3.954
TM	1.4498
TM	1.8452
TM	6.3264
TM	1.1862
TM	19.111
TM	3.5586
TM	2.7678
TM	4.7448
TM	3.5586
TM	2.636
TM	2.2406
TM	3.0314
TM	2.2406
TM	7.249
TM	11.862
TM	4.8766
TM	1.977
TM	2.8996
TM	2.7678
TM	2.8996
TM	3.4268
TM	3.0314
TM	4.7448
TM	4.2176
TM	3.4268
TM	1.8452
TM	4.8766
TM	3.8222
TM	4.4812
TM	2.1088
TM	1.0544
TM	7.3808
TM	3.0314
TM	2.8996
TM	2.7678
TM	3.1632
TM	2.636
TM	3.5586
TM	2.8996
TM	2.636
TM	3.4268
TM	1.5816
TM	2.3724
TM	2.1088
TM	1.0544
TM	4.2176
TM	6.1946
TM	4.4812
TM	2.3724
TM	1.8452
TM	1.977
TM	3.5586
TM	2.8996
TM	5.1402
TM	2.1088
TM	3.0314
TM	4.3494
TM	2.7678
TM	1.4498
TM	1.318
TM	5.4038
TM	4.3494
TM	1.8452
TM	7.249
TM	3.295
TM	2.2406
TM	5.931
TM	4.2176
TM	3.6904
TM	4.7448
TM	2.2406
TM	1.318
TM	3.0314
TM	8.3034
TM	3.295
TM	1.318
TM	2.636
TM	2.1088
TM	2.1088
TM	2.1088
TM	4.8766
TM	2.2406
TM	5.1402
TM	4.7448
TM	11.7302
TM	3.0314
TM	5.5356
TM	2.5042
TM	5.272
TM	4.4812
TM	6.8536
TM	1.7134
TM	3.4268
TM	3.6904
TM	4.4812
TM	4.0858
TM	6.4582
TM	4.0858
TM	2.8996
TM	2.1088
TM	5.6674
TM	3.295
TM	2.5042
TM	8.9624
TM	1.0544
TM	3.954
TM	2.3724
TM	1.318
TM	1.318
TM	1.4498
TM	3.5586
TM	3.295
TM	2.8996
TM	8.8306
TM	5.931
TM	9.4896
TM	9.7532
TM	3.954
TM	3.5586
TM	6.9854
TM	6.1946
TM	7.5126
TM	4.8766
TM	2.2406
TM	3.295
TM	4.3494
TM	1.4498
TM	4.3494
TM	2.2406
TM	1.5816
TM	2.2406
TM	2.3724
TM	12.3892
TM	5.931
TM	1.977
TM	5.1402
TM	3.0314
TM	2.636
TM	4.2176
TM	6.7218
TM	5.7992
TM	2.5042
TM	14.498
TM	22.2742
TM	19.3746
TM	8.567
TM	1.5816
TM	1.8452
TM	2.5042
TM	1.318
TM	4.2176
TM	5.4038
TM	5.0084
TM	3.954
TM	4.613
TM	2.8996
TM	1.977
TM	3.1632
TM	4.2176
TM	1.7134
TM	1.5816
TM	3.4268
TM	1.977
TM	2.8996
N-L2mut	13.7072
N-L2mut	6.7218
N-L2mut	4.4812
N-L2mut	2.636
N-L2mut	2.2406
N-L2mut	3.6904
N-L2mut	10.2804
N-L2mut	2.5042
N-L2mut	3.4268
N-L2mut	3.0314
N-L2mut	1.318
N-L2mut	1.8452
N-L2mut	4.8766
N-L2mut	6.7218
N-L2mut	7.7762
N-L2mut	2.7678
N-L2mut	4.0858
N-L2mut	5.6674
N-L2mut	1.5816
N-L2mut	3.8222
N-L2mut	2.5042
N-L2mut	6.1946
N-L2mut	8.1716
N-L2mut	1.8452
N-L2mut	2.8996
N-L2mut	1.977
N-L2mut	1.5816
N-L2mut	3.8222
N-L2mut	16.0796
N-L2mut	1.977
N-L2mut	2.7678
N-L2mut	3.295
N-L2mut	3.6904
N-L2mut	3.1632
N-L2mut	5.0084
N-L2mut	6.7218
N-L2mut	6.4582
N-L2mut	2.636
N-L2mut	6.9854
N-L2mut	1.977
N-L2mut	3.5586
N-L2mut	4.7448
N-L2mut	1.977
N-L2mut	1.8452
N-L2mut	3.1632
N-L2mut	3.0314
N-L2mut	3.295
N-L2mut	2.636
N-L2mut	3.1632
N-L2mut	2.1088
N-L2mut	5.1402
N-L2mut	3.0314
N-L2mut	3.1632
N-L2mut	2.1088
N-L2mut	5.931
N-L2mut	1.8452
N-L2mut	1.8452
N-L2mut	1.5816
N-L2mut	2.2406
N-L2mut	2.8996
N-L2mut	3.0314
N-L2mut	1.977
N-L2mut	3.1632
N-L2mut	3.295
N-L2mut	2.8996
N-L2mut	3.1632
N-L2mut	7.1172
N-L2mut	5.0084
N-L2mut	5.6674
N-L2mut	7.3808
N-L2mut	2.5042
N-L2mut	2.3724
N-L2mut	2.2406
N-L2mut	2.1088
N-L2mut	1.5816
N-L2mut	5.272
N-L2mut	6.4582
N-L2mut	2.1088
N-L2mut	3.954
N-L2mut	2.2406
N-L2mut	2.2406
N-L2mut	1.318
N-L2mut	2.2406
N-L2mut	4.2176
N-L2mut	1.4498
N-L2mut	2.8996
N-L2mut	1.318
N-L2mut	1.5816
N-L2mut	3.1632
N-L2mut	2.7678
N-L2mut	1.977
N-L2mut	2.7678
N-L2mut	1.318
N-L2mut	1.0544
N-L2mut	0.9226
N-L2mut	1.318
N-L2mut	1.1862
N-L2mut	1.318
N-L2mut	1.318
N-L2mut	3.295
N-L2mut	1.7134
N-L2mut	4.0858
N-L2mut	1.8452
N-L2mut	1.4498
N-L2mut	1.1862
N-L2mut	1.1862
N-L2mut	0.7908
N-L2mut	4.4812
N-L2mut	3.5586
N-L2mut	3.8222
N-L2mut	6.9854
N-L2mut	3.6904
N-L2mut	2.5042
N-L2mut	0.7908
N-L2mut	2.7678
N-L2mut	2.5042
N-L2mut	1.0544
N-L2mut	3.1632
N-L2mut	4.8766
N-L2mut	1.1862
N-L2mut	3.0314
N-L2mut	1.5816
N-L2mut	1.1862
N-L2mut	1.977
N-L2mut	2.1088
N-L2mut	1.7134
N-L2mut	1.7134
N-L2mut	2.3724
N-L2mut	2.636
