# Supplementary material for: Interaction between Teneurin-2 and microtubules via EB proteins provides a platform for GABAA receptor exocytosis
Source: eLife journal article supplement (doi:10.7554/elife.83276), 2023-06-05
Supplement: fig7-data1 [file 7E.xlsx]

## Sheet: Figure 7E
Comet Duration
Anterograde										Retrograde
transfection	duration									transfection	duration
N-L	44.55		Df Sum Sq Mean Sq F value Pr(>F)							N-L	109.89		Df Sum Sq Mean Sq F value Pr(>F)
N-L	65.34		transfection 2 6633 3316 3.16 0.0432 *							N-L	26.73		transfection 2 8005 4003 1.943 0.147
N-L	59.4		Residuals 571 599325 1050							N-L	219.78		Residuals 161 331675 2060
N-L	41.58		---							N-L	50.49
N-L	38.61		Signif. codes: 0 ‘***’ 0.001 ‘**’ 0.01 ‘*’ 0.05 ‘.’ 0.1 ‘ ’ 1							N-L	20.79
N-L	41.58									N-L	71.28
N-L	89.1		Tukey multiple comparisons of means							N-L	65.34		Tukey multiple comparisons of means
N-L	41.58		95% family-wise confidence level							N-L	11.88		95% family-wise confidence level
N-L	8.91									N-L	23.76
N-L	89.1									N-L	11.88
N-L	74.25									N-L	23.76
N-L	35.64		$transfection							N-L	65.34		$transfection
N-L	38.61		diff lwr upr p adj							N-L	83.16		diff lwr upr p adj
N-L	65.34		N-L2mut-N-L -2.190985 -10.682472 6.300502 0.8167313							N-L	50.49		N-L2mut-N-L -15.613269 -37.298969 6.07243 0.2071254
N-L	47.52		TM-N-L 5.862408 -1.385079 13.109896 0.1393724							N-L	53.46		TM-N-L 1.530381 -17.706740 20.76750 0.9806674
N-L	53.46		TM-N-L2mut 8.053394 -0.247449 16.354236 0.0594689							N-L	32.67		TM-N-L2mut 17.143651 -5.014718 39.30202 0.1630293
N-L	83.16									N-L	148.5
N-L	35.64									N-L	68.31
N-L	86.13									N-L	53.46
N-L	32.67									N-L	53.46
N-L	50.49									N-L	160.38
N-L	124.74									N-L	83.16
N-L	35.64									N-L	80.19
N-L	44.55									N-L	77.22
N-L	50.49									N-L	26.73
N-L	53.46									N-L	32.67
N-L	47.52									N-L	50.49
N-L	35.64									N-L	14.85
N-L	121.77									N-L	63.855
N-L	26.73									N-L	47.52
N-L	44.55									N-L	210.87
N-L	35.64									N-L	74.25
N-L	35.64									N-L	68.31
N-L	29.7									N-L	23.76
N-L	80.19									N-L	62.37
N-L	23.76									N-L	145.53
N-L	20.79									N-L	26.73
N-L	44.55									N-L	29.7
N-L	80.19									N-L	62.37
N-L	20.79									N-L	118.8
N-L	20.79									N-L	89.1
N-L	53.46									N-L	98.01
N-L	44.55									N-L	20.79
N-L	20.79									N-L	17.82
N-L	17.82									N-L	38.61
N-L	80.19									N-L	8.91
N-L	65.34									N-L	109.89
N-L	23.76									N-L	29.7
N-L	133.65									N-L	115.83
N-L	71.28									N-L	50.49
N-L	98.01									N-L	11.88
N-L	17.82									N-L	14.85
N-L	44.55									N-L	83.16
N-L	23.76									N-L	41.58
N-L	53.46									N-L	68.31
N-L	29.7									N-L	98.01
N-L	23.76									N-L	23.76
N-L	53.46									N-L	74.25
N-L	29.7									N-L	231.66
N-L	29.7									N-L	89.1
N-L	35.64									N-L	133.65
N-L	65.34									N-L	98.01
N-L	47.52									N-L	92.07
N-L	59.4									N-L	14.85
N-L	62.37									N-L	44.55
N-L	35.64									N-L	130.68
N-L	41.58									TM	50.49
N-L	26.73									TM	95.04
N-L	26.73									TM	77.22
N-L	20.79									TM	106.92
N-L	23.76									TM	65.34
N-L	23.76									TM	47.52
N-L	32.67									TM	178.2
N-L	11.88									TM	62.37
N-L	11.88									TM	59.4
N-L	17.82									TM	74.25
N-L	124.74									TM	62.37
N-L	26.73									TM	68.31
N-L	29.7									TM	106.92
N-L	127.71									TM	154.44
N-L	74.25									TM	35.64
N-L	32.67									TM	14.85
N-L	50.49									TM	71.28
N-L	26.73									TM	204.93
N-L	29.7									TM	38.61
N-L	41.58									TM	47.52
N-L	32.67									TM	47.52
N-L	14.85									TM	83.16
N-L	14.85									TM	41.58
N-L	14.85									TM	41.58
N-L	118.8									TM	32.67
N-L	26.73									TM	44.55
N-L	38.61									TM	17.82
N-L	77.22									TM	23.76
N-L	38.61									TM	74.25
N-L	50.49									TM	32.67
N-L	68.31									TM	139.59
N-L	35.64									TM	41.58
N-L	56.43									TM	50.49
N-L	71.28									TM	219.78
N-L	38.61									TM	83.16
N-L	100.98									TM	59.4
N-L	77.22									TM	86.13
N-L	56.43									TM	26.73
N-L	23.76									TM	38.61
N-L	32.67									TM	32.67
N-L	50.49									TM	222.75
N-L	59.4									TM	35.64
N-L	29.7									TM	53.46
N-L	17.82									TM	98.01
N-L	38.61									TM	44.55
N-L	115.83									TM	29.7
N-L	20.79									TM	145.53
N-L	166.32									TM	47.52
N-L	59.4									TM	23.76
N-L	26.73									TM	23.76
N-L	26.73									TM	17.82
N-L	175.23									TM	115.83
N-L	17.82									TM	62.37
N-L	100.98									TM	65.34
N-L	32.67									TM	29.7
N-L	103.95									TM	80.19
N-L	47.52									TM	35.64
N-L	44.55									TM	80.19
N-L	65.34									TM	92.07
N-L	17.82									N-L2mut	103.95
N-L	47.52									N-L2mut	44.55
N-L	44.55									N-L2mut	74.25
N-L	65.34									N-L2mut	38.61
N-L	17.82									N-L2mut	23.76
N-L	29.7									N-L2mut	103.95
N-L	32.67									N-L2mut	29.7
N-L	11.88									N-L2mut	44.55
N-L	41.58									N-L2mut	50.49
N-L	32.67									N-L2mut	56.43
N-L	41.58									N-L2mut	44.55
N-L	17.82									N-L2mut	118.8
N-L	23.76									N-L2mut	92.07
N-L	17.82									N-L2mut	112.86
N-L	53.46									N-L2mut	53.46
N-L	38.61									N-L2mut	80.19
N-L	20.79									N-L2mut	35.64
N-L	44.55									N-L2mut	47.52
N-L	29.7									N-L2mut	77.22
N-L	11.88									N-L2mut	89.1
N-L	17.82									N-L2mut	71.28
N-L	32.67									N-L2mut	56.43
N-L	98.01									N-L2mut	38.61
N-L	74.25									N-L2mut	26.73
N-L	59.4									N-L2mut	68.31
N-L	26.73									N-L2mut	23.76
N-L	59.4									N-L2mut	32.67
N-L	83.16									N-L2mut	38.61
N-L	44.55									N-L2mut	32.67
N-L	29.7									N-L2mut	20.79
N-L	11.88									N-L2mut	32.67
N-L	38.61									N-L2mut	71.28
N-L	23.76									N-L2mut	29.7
N-L	50.49									N-L2mut	8.91
N-L	29.7									N-L2mut	29.7
N-L	106.92									N-L2mut	59.4
N-L	32.67									N-L2mut	44.55
N-L	74.25									N-L2mut	44.55
N-L	83.16									N-L2mut	17.82
N-L	23.76
N-L	11.88
N-L	47.52
N-L	32.67
N-L	41.58
N-L	26.73
N-L	71.28
N-L	92.07
N-L	32.67
N-L	50.49
N-L	160.38
N-L	29.7
N-L	53.46
N-L	80.19
N-L	56.43
N-L	62.37
N-L	17.82
N-L	17.82
N-L	59.4
N-L	26.73
N-L	23.76
N-L	29.7
N-L	29.7
N-L	20.79
N-L	50.49
N-L	14.85
N-L	47.52
N-L	62.37
N-L	62.37
N-L	20.79
N-L	17.82
N-L	98.01
N-L	29.7
N-L	80.19
N-L	92.07
N-L	56.43
N-L	35.64
N-L	53.46
N-L	62.37
N-L	100.98
N-L	23.76
N-L	47.52
N-L	38.61
N-L	23.76
TM	106.92
TM	148.5
TM	20.79
TM	112.86
TM	92.07
TM	133.65
TM	62.37
TM	56.43
TM	62.37
TM	77.22
TM	53.46
TM	50.49
TM	68.31
TM	17.82
TM	41.58
TM	32.67
TM	26.73
TM	44.55
TM	50.49
TM	56.43
TM	32.67
TM	29.7
TM	35.64
TM	20.79
TM	92.07
TM	50.49
TM	106.92
TM	148.5
TM	20.79
TM	112.86
TM	92.07
TM	133.65
TM	62.37
TM	56.43
TM	62.37
TM	77.22
TM	53.46
TM	50.49
TM	68.31
TM	17.82
TM	41.58
TM	32.67
TM	26.73
TM	44.55
TM	50.49
TM	56.43
TM	32.67
TM	29.7
TM	35.64
TM	20.79
TM	92.07
TM	50.49
TM	38.61
TM	26.73
TM	14.85
TM	47.52
TM	80.19
TM	47.52
TM	100.98
TM	38.61
TM	130.68
TM	44.55
TM	26.73
TM	47.52
TM	23.76
TM	68.31
TM	65.34
TM	41.58
TM	65.34
TM	68.31
TM	89.1
TM	26.73
TM	29.7
TM	77.22
TM	50.49
TM	237.6
TM	50.49
TM	38.61
TM	62.37
TM	41.58
TM	17.82
TM	47.52
TM	65.34
TM	32.67
TM	74.25
TM	142.56
TM	115.83
TM	29.7
TM	65.34
TM	47.52
TM	68.31
TM	50.49
TM	47.52
TM	53.46
TM	47.52
TM	50.49
TM	23.76
TM	77.22
TM	62.37
TM	74.25
TM	29.7
TM	8.91
TM	77.22
TM	26.73
TM	26.73
TM	35.64
TM	50.49
TM	38.61
TM	35.64
TM	32.67
TM	29.7
TM	38.61
TM	17.82
TM	47.52
TM	32.67
TM	29.7
TM	44.55
TM	68.31
TM	44.55
TM	32.67
TM	32.67
TM	44.55
TM	38.61
TM	29.7
TM	68.31
TM	20.79
TM	44.55
TM	59.4
TM	50.49
TM	14.85
TM	23.76
TM	80.19
TM	38.61
TM	17.82
TM	103.95
TM	56.43
TM	38.61
TM	50.49
TM	41.58
TM	50.49
TM	41.58
TM	23.76
TM	17.82
TM	38.61
TM	92.07
TM	56.43
TM	17.82
TM	44.55
TM	38.61
TM	23.76
TM	35.64
TM	74.25
TM	29.7
TM	92.07
TM	41.58
TM	151.47
TM	44.55
TM	71.28
TM	56.43
TM	38.61
TM	71.28
TM	112.86
TM	20.79
TM	62.37
TM	29.7
TM	65.34
TM	44.55
TM	77.22
TM	65.34
TM	35.64
TM	20.79
TM	53.46
TM	77.22
TM	26.73
TM	92.07
TM	17.82
TM	62.37
TM	47.52
TM	23.76
TM	17.82
TM	17.82
TM	77.22
TM	65.34
TM	32.67
TM	95.04
TM	62.37
TM	103.95
TM	109.89
TM	26.73
TM	32.67
TM	77.22
TM	59.4
TM	62.37
TM	59.4
TM	23.76
TM	32.67
TM	41.58
TM	26.73
TM	44.55
TM	20.79
TM	14.85
TM	26.73
TM	26.73
TM	103.95
TM	50.49
TM	23.76
TM	59.4
TM	23.76
TM	35.64
TM	38.61
TM	59.4
TM	56.43
TM	23.76
TM	163.35
TM	207.9
TM	154.44
TM	86.13
TM	17.82
TM	32.67
TM	32.67
TM	23.76
TM	65.34
TM	68.31
TM	44.55
TM	56.43
TM	62.37
TM	32.67
TM	44.55
TM	32.67
TM	59.4
TM	23.76
TM	26.73
TM	56.43
TM	29.7
TM	53.46
N-L2mut	163.35
N-L2mut	77.22
N-L2mut	163.35
N-L2mut	77.22
N-L2mut	41.58
N-L2mut	20.79
N-L2mut	23.76
N-L2mut	41.58
N-L2mut	127.71
N-L2mut	35.64
N-L2mut	44.55
N-L2mut	26.73
N-L2mut	26.73
N-L2mut	32.67
N-L2mut	41.58
N-L2mut	115.83
N-L2mut	80.19
N-L2mut	23.76
N-L2mut	41.58
N-L2mut	59.4
N-L2mut	20.79
N-L2mut	23.76
N-L2mut	32.67
N-L2mut	86.13
N-L2mut	95.04
N-L2mut	26.73
N-L2mut	38.61
N-L2mut	26.73
N-L2mut	53.46
N-L2mut	83.16
N-L2mut	249.48
N-L2mut	23.76
N-L2mut	26.73
N-L2mut	38.61
N-L2mut	38.61
N-L2mut	29.7
N-L2mut	74.25
N-L2mut	95.04
N-L2mut	71.28
N-L2mut	44.55
N-L2mut	77.22
N-L2mut	26.73
N-L2mut	29.7
N-L2mut	59.4
N-L2mut	20.79
N-L2mut	26.73
N-L2mut	35.64
N-L2mut	38.61
N-L2mut	41.58
N-L2mut	38.61
N-L2mut	47.52
N-L2mut	41.58
N-L2mut	80.19
N-L2mut	89.1
N-L2mut	47.52
N-L2mut	68.31
N-L2mut	59.4
N-L2mut	68.31
N-L2mut	77.22
N-L2mut	68.31
N-L2mut	26.73
N-L2mut	23.76
N-L2mut	47.52
N-L2mut	29.7
N-L2mut	23.76
N-L2mut	44.55
N-L2mut	20.79
N-L2mut	29.7
N-L2mut	112.86
N-L2mut	35.64
N-L2mut	65.34
N-L2mut	77.22
N-L2mut	26.73
N-L2mut	8.91
N-L2mut	23.76
N-L2mut	17.82
N-L2mut	29.7
N-L2mut	83.16
N-L2mut	83.16
N-L2mut	8.91
N-L2mut	29.7
N-L2mut	29.7
N-L2mut	26.73
N-L2mut	20.79
N-L2mut	26.73
N-L2mut	56.43
N-L2mut	35.64
N-L2mut	41.58
N-L2mut	20.79
N-L2mut	20.79
N-L2mut	41.58
N-L2mut	38.61
N-L2mut	32.67
N-L2mut	23.76
N-L2mut	11.88
N-L2mut	26.73
N-L2mut	14.85
N-L2mut	23.76
N-L2mut	23.76
N-L2mut	38.61
N-L2mut	20.79
N-L2mut	50.49
N-L2mut	35.64
N-L2mut	59.4
N-L2mut	29.7
N-L2mut	26.73
N-L2mut	62.37
N-L2mut	8.91
N-L2mut	14.85
N-L2mut	68.31
N-L2mut	41.58
N-L2mut	35.64
N-L2mut	89.1
N-L2mut	29.7
N-L2mut	23.76
N-L2mut	11.88
N-L2mut	59.4
N-L2mut	56.43
N-L2mut	50.49
N-L2mut	35.64
N-L2mut	38.61
N-L2mut	8.91
N-L2mut	35.64
N-L2mut	26.73
N-L2mut	17.82
N-L2mut	20.79
N-L2mut	17.82
N-L2mut	23.76
N-L2mut	47.52
N-L2mut	62.37
N-L2mut	38.61
