# Supplementary material for: Interaction between Teneurin-2 and microtubules via EB proteins provides a platform for GABAA receptor exocytosis
Source: eLife journal article supplement (doi:10.7554/elife.83276), 2023-06-05
Supplement: fig7-data1 [file 7G.xlsx]

## Sheet: Figure 7G
The density of gephyrin puncta in neurons expressing each partial domain
TEN2	density (/100 µm)
N-L	14.8		Df Sum Sq Mean Sq F value Pr(>F)
N-L	5.43		TEN2 2 1442 721.1 13.77 8.82e-06 ***
N-L	6.97		Residuals 71 3717 52.4
N-L	17.51		---
N-L	7.02		Signif. codes: 0 ‘***’ 0.001 ‘**’ 0.01 ‘*’ 0.05 ‘.’ 0.1 ‘ ’ 1
N-L	11.52
N-L	9.25		Tukey multiple comparisons of means
N-L	1.05		95% family-wise confidence level
N-L	26.5
N-L	24.14
N-L	1.92
N-L	18.34		$TEN2
N-L	7.96		diff lwr upr p adj
N-L	3.14		N-L2mut-N-L 5.933276 1.0588660 10.807687 0.0130833
N-L	0.44		TM-N-L 10.609363 5.7349529 15.483774 0.0000053
N-L	6.49		TM-N-L2mut 4.676087 -0.4316794 9.783853 0.0795567
N-L	2.73
N-L	11.07
N-L	6.6
N-L	12.6
N-L	15.26
N-L	4.32
N-L	13.25
N-L	26.8
N-L	13.35
N-L	11.85
N-L	16.2
N-L	8.72
TM	25.08
TM	18.51
TM	10.68
TM	29.37
TM	32.46
TM	54.61
TM	27.36
TM	19.91
TM	19.95
TM	16.84
TM	19.86
TM	14.2
TM	12.81
TM	20.41
TM	20.52
TM	21.28
TM	14.74
TM	22.07
TM	18.39
TM	11.83
TM	21.74
TM	18.22
TM	23.9
N-L2mut	24.27
N-L2mut	8.06
N-L2mut	23.19
N-L2mut	18.81
N-L2mut	15.14
N-L2mut	17.48
N-L2mut	20.32
N-L2mut	23.04
N-L2mut	12.66
N-L2mut	26.82
N-L2mut	18.31
N-L2mut	8.13
N-L2mut	16.07
N-L2mut	16.3
N-L2mut	12.74
N-L2mut	11.35
N-L2mut	16.47
N-L2mut	18.46
N-L2mut	14.32
N-L2mut	20.55
N-L2mut	12.73
N-L2mut	17.54
N-L2mut	14.43
