# Supplementary material for: Interaction between Teneurin-2 and microtubules via EB proteins provides a platform for GABAA receptor exocytosis
Source: eLife journal article supplement (doi:10.7554/elife.83276), 2023-06-05
Supplement: fig7-data1 [file 7H.xlsx]

## Sheet: Figure 7H
The density of GABAARγ2 puncta in neurons expressing each partial domain
TEN2	density (/100 µm)
N-L	27.67
N-L	36.54		Df Sum Sq Mean Sq F value Pr(>F)
N-L	40.64		TEN2 2 1306 653.1 5.073 0.0109 *
N-L	54.24		Residuals 40 5149 128.7
N-L	24.61		---
N-L	38.11		Signif. codes: 0 ‘***’ 0.001 ‘**’ 0.01 ‘*’ 0.05 ‘.’ 0.1 ‘ ’ 1
N-L	37.81
N-L	10.36		Tukey multiple comparisons of means
TM	34.76		95% family-wise confidence level
TM	56.73
TM	40.4
TM	62.84
TM	38.93		$TEN2
TM	45.11		diff lwr upr p adj
TM	65.14		N-L2mut-N-L 7.839022 -3.495826 19.17387 0.2240307
TM	50.3		TM-N-L 16.247500 3.643072 28.85193 0.0087753
TM	44.63		TM-N-L2mut 8.408478 -1.425364 18.24232 0.1066295
TM	50.72
TM	52.23
TM	58.15
N-L2mut	51.44
N-L2mut	25.21
N-L2mut	40.37
N-L2mut	40.78
N-L2mut	34.11
N-L2mut	44.01
N-L2mut	65.03
N-L2mut	39.15
N-L2mut	35.72
N-L2mut	43.87
N-L2mut	59.4
N-L2mut	36.9
N-L2mut	33.92
N-L2mut	50.11
N-L2mut	15.18
N-L2mut	36.32
N-L2mut	40.94
N-L2mut	51.21
N-L2mut	35.2
N-L2mut	59.23
N-L2mut	25.95
N-L2mut	48.12
N-L2mut	44.32
