# Supplementary material for: Interaction between Teneurin-2 and microtubules via EB proteins provides a platform for GABAA receptor exocytosis
Source: eLife journal article supplement (doi:10.7554/elife.83276), 2023-06-05
Supplement: fig7-figsupp1-data1 [file S7B.xlsx]

## Sheet: Sheet1
Signal intensity of MAP2.
a-b			c-d
Distance (µm)	MAP2 (AU)		Distance (µm)	MAP2 (AU)
0	343		0	99.993
0.13179	307.296		0.13179	934.156
0.26358	488.401		0.26358	90.648
0.39536	192.834		0.39536	1100.73
0.52715	77.975		0.52715	10067.7
0.65894	103.61		0.65894	14848.7
0.79073	367.314		0.79073	21928.6
0.92252	882.834		0.92252	27035.1
1.05431	1621.67		1.05431	18241
1.18609	1229.83		1.18609	12105.2
1.31788	4778.39		1.31788	10678.1
1.44967	12022.6		1.44967	9589.46
1.58146	25668.7		1.58146	11810
1.71325	35728.1		1.71325	14740.2
1.84504	44111.4		1.84504	17206.6
1.97682	47018.6		1.97682	9308.58
2.10861	46746.6		2.10861	7504.44
2.2404	54015.9		2.2404	6649.6
2.37219	49504.6		2.37219	5973.69
2.50398	59847.2		2.50398	8065.75
2.63576	57752.2		2.63576	5983.73
2.76755	58108.9		2.76755	6569.87
2.89934	52385.9		2.89934	9336.33
3.03113	37237		3.03113	7140.77
3.16292	27738.3		3.16292	5768.15
3.29471	12905.4		3.29471	8690.33
3.42649	9011.47		3.42649	10767.5
3.55828	1529.46		3.55828	11526.2
3.69007	204.123		3.69007	10534.2
3.82186	226.354		3.82186	18750.8
3.95365	992.331		3.95365	23707.8
4.08543	577.002		4.08543	16684.3
4.21722	76.756		4.21722	20273.7
4.34901	76.247		4.34901	16062.2
4.4808	293.312		4.4808	10290.6
4.61259	105.085		4.61259	7706.3
4.74438	79.074		4.74438	3660.65
4.87616	77.045		4.87616	3097.96
5.00795	75.299		5.00795	2467.74
5.13974	2061.49		5.13974	2363.51
5.27153	879.168		5.27153	1946.12
5.40332	1509.3		5.40332	365.574
5.53511	1837.96		5.53511	99.325
5.66689	586.861		5.66689	99.993
5.79868	276.127		5.79868	100.804
5.93047	1377.47		5.93047	99.669
6.06226	1240		6.06226	101.162
