# Supplementary material for: Interaction between Teneurin-2 and microtubules via EB proteins provides a platform for GABAA receptor exocytosis
Source: eLife journal article supplement (doi:10.7554/elife.83276), 2023-06-05
Supplement: fig7-figsupp1-data1 [file S7C.xlsx]

## Sheet: 001
The ratio of neurons with membrane-biased MTs.
TEN2	ratio
TM	0
TM	0.166667		Welch Two Sample t-test
TM	0
N-L	0.4		data: ratio by transfection
N-L	0.428571		t = 4.7699, df = 3.7877, p-value = 0.01011
N-L	0.625		alternative hypothesis: true difference in means between group N-L and group TM is not equal to 0
			95 percent confidence interval:
			0.1736571 0.6842794
			sample estimates:
			mean in group N-L mean in group TM
			0.48452381 0.05555556
